# Supplementary material for: Method effects associated with negatively and positively worded items on the 12-item General Health Questionnaire (GHQ-12): results from a cross-sectional survey with a representative sample of Catalonian workers
Source: PubMed Central journal article supplement — BMJ Open. 2019 Nov 28;9(11):e031859. doi: 10.1136/bmjopen-2019-031859 (PMC6924827; doi:10.1136/bmjopen-2019-031859), 2019-11-28
Supplement: bmjopen-2019-031859.draft_revisions.pdf [file bmjopen-2019-031859.draft_revisions.pdf]

# BMJ Open

BMJ Open is committed to open peer review. As part of this commitment we make the peer review history of every article we publish publicly available.

When an article is published we post the peer reviewers' comments and the authors' responses online. We also post the versions of the paper that were used during peer review. These are the versions that the peer review comments apply to.

The versions of the paper that follow are the versions that were submitted during the peer review process. They are not the versions of record or the final published versions. They should not be cited or distributed as the published version of this manuscript.

BMJ Open is an open access journal and the full, final, typeset and author-corrected version of record of the manuscript is available on our site with no access controls, subscription charges or pay-per-view fees (<http://bmjopen.bmj.com>).

If you have any questions on BMJ Open's open peer review process please email [info.bmjopen@bmj.com](mailto:info.bmjopen@bmj.com)

# BMJ Open

## Method Effects Associated with Negatively and Positively Worded Items on the 12-Item General Health Questionnaire (GHQ-12)

|                               |                                                                                                                                                                                                         |
|-------------------------------|---------------------------------------------------------------------------------------------------------------------------------------------------------------------------------------------------------|
| Journal:                      | <i>BMJ Open</i>                                                                                                                                                                                         |
| Manuscript ID                 | bmjopen-2019-031859                                                                                                                                                                                     |
| Article Type:                 | Research                                                                                                                                                                                                |
| Date Submitted by the Author: | 22-May-2019                                                                                                                                                                                             |
| Complete List of Authors:     | Rodrigo, Maria F.; University of Valencia<br>Molina, J. Gabriel; University of Valencia<br>Losilla, Josep-Maria; Autonomous University of Barcelona<br>Vives, Jaume; Autonomous University of Barcelona |
| Keywords:                     | psychological health, General Health Questionnaire (GHQ-12), method effects, item wording effects, confirmatory factor analysis                                                                         |
|                               |                                                                                                                                                                                                         |

SCHOLARONE™  
Manuscripts

**Title**

Method Effects Associated with Negatively and Positively Worded Items on the 12-Item General Health Questionnaire (GHQ-12)

**2. Authors and affiliation**

Rodrigo, Maria F.  
Department of Research Methods in Psychology  
University of Valencia  
Valencia (Spain)

Molina, J. Gabriel †  
Department of Research Methods in Psychology  
University of Valencia  
Valencia (Spain)

Losilla, Josep-Maria  
Department of Psychobiology and Methodology of Health Sciences  
Universitat Autònoma de Barcelona  
Barcelona (Spain)

Vives, Jaume  
Department of Psychobiology and Methodology of Health Sciences  
Universitat Autònoma de Barcelona  
Barcelona (Spain)

†Deceased 26 September 2014

3. Word count, excluding title page, abstract, references, figures and table: 3086

**4. Authors' statements**

All authors have agreed to authorship in the indicated order.

All authors declare that this paper is an original unpublished work and it is not being submitted elsewhere.

All authors do not have any financial interests that might be interpreted as influencing the research, and APA ethical standard were followed in the conduct of the study.

The research was not submitted to approval by an institutional review board since this is not a requirement at our universities for this type of study.

**5. Contact information for the corresponding author:**

Jaume Vives  
Department of Psychobiology and Methodology of Health Sciences  
Universitat Autònoma de Barcelona  
Edifici B - Despatx B5b/081  
Carrer de la Fortuna / Carrer de Ca n'Altayó. Campus de la UAB  
08193 Bellaterra (Cerdanyola del Vallès). Barcelona (Spain)  
E-mail: jaume.vives@uab.cat  
Phone: +34 93 581 23 31

## Abstract

**Objective.** Recent studies into the factorial structure of the 12-item version of the General Health Questionnaire (GHQ-12) have shown that it was best represented by a single substantive factor when method effects associated with negatively worded (NW) items are considered. The purpose of the present study was to examine the presence of method effects, and their relationships with demographic covariates, associated with positively worded (PW) and/or NW items.

**Method.** The current work compared a comprehensive set of confirmatory factor models, including method effects associated with PW and/or NW items with GHQ-12 responses using a random sample of 3050 workers.

**Results.** A confirmatory factor analysis showed that the best-fitting model was a unidimensional model with two additional method factors associated with PW and NW items. Furthermore, structural equation modeling revealed that method effects were differentially related to both the sex and educational level of the respondents.

**Conclusion.** Individual differences related to sex and educational level can help to identify respondents who are prone to answering PW and NW items differently. Consequently, it is desirable that both the constructs of interest as well as the effects of method factors are considered in SEM models as a means of avoiding the drawing of inaccurate conclusions about the relationships between the substantive factors.

## Keywords

psychological health, General Health Questionnaire (GHQ-12), method effects, item wording effects, confirmatory factor analysis

## Strengths and limitations of this study

### Strengths

- Sampling quality: A random and large representative sample of workers and face-to-face administration by professional interviewers.
- To compare confirmatory models for positively and/or negatively worded items and using two different parameterizations.
- To study demographic correlates of wording effects.

### Limitations

- The different response scale used for the NW items and the PW items in the questionnaire could be a confusion variable.
- The results might not be generalized to other specific populations as, for example, adolescents and elderly retired people.

## Introduction

Originally developed by Goldberg[1], the General Health Questionnaire (GHQ) has been widely used as a screening instrument for measuring General Psychological Health (GPH) in both community and non-psychiatric clinical settings[2]. The shortest 12-item version (GHQ-12) is the most popular and has been employed on different settings and in several countries, as well as part of multiple major national health, social wellbeing and occupational surveys, achieving results which underline the fact that it is highly reliable and valid[3-11].

Despite its broad application, the factor structure underlying the responses to the GHQ-12 remains a controversial issue. In this sense, although the GHQ-12 was originally developed as a unidimensional scale, this one-factor latent structure has found little empirical support and some alternative multidimensional models, have been proposed as more appropriate. Thus, the one with the most empirical support is the three-factor model proposed by Graetz[12][5,13,22,14-21]. It is important to note that the 6 positively worded (PW) items make up the first factor, whereas the other two factors are made up of the 6 negatively worded (NW) items (see Figure 1, Model 3). On the other hand, the bidimensional model, where the 6 NW and the 6 PW items in the GHQ-12 are grouped into two factors (see Figure 1, Model 2), has also obtained wide support, especially in studies based on exploratory factor analysis[5,10,23-28]. The arguments against these models and in favor of the unidimensional solution are the high correlations between the factors[13] and the low discriminant validity of the factor scores derived from these models[16,29,30].

As Hankins[31] points out, multifactor models may just be the resulting artifact of the inclusion of PW and NW items in the questionnaire and so, the controversy about the factorial structure of the GHQ-12 might relate to the effect of item wording on subjects' response patterns as part of a more general category called 'method'[32,33]. Hankins[31] found that, after modeling the wording effects for the NW items, the unidimensional model fitted better than both the two-factor model (NW vs. PW items) and Graetz's three-factor model. Other studies have called into question the substantive meaning of the GHQ-12 multifactor solutions, suggesting that they might just be an

1  
2  
3 artifact due to the wording effects associated with NW items[29,30,34–40]. See Molina et al.[36]  
4  
5 for a deeper review about the dimensionality of GHQ-12.  
6

7  
8 Some studies about other instruments, however, suggested not only considering the wording  
9  
10 effects for the NW items but also for the PW items[41,42]. Regarding GHQ-12, only a recent  
11  
12 analytical factor meta-analysis modelled the presence of method effects for negatively and  
13  
14 positively worded items concluding that positively keyed items explained incremental variance  
15  
16 beyond a general mental health factor[43].  
17

18  
19 Another source of variability in the results about the factor structure of the GHQ-12 could  
20  
21 come from the statistical control of method biases, that has been mainly achieved through the  
22  
23 correlated traits–correlated methods (CTCM) and the correlated traits–correlated uniquenesses  
24  
25 (CTCU) confirmatory factor analysis models. Both procedures have been used in GHQ–12, to deal  
26  
27 with method effects applying the CTCM model[i.e., 30,44] the CTCU model[i.e., 29,31,39,40], or  
28  
29 both CTCM and CTCU[i.e., 34–37].  
30  
31

32  
33 To date, we have not found any studies about GHQ-12 that analyze the wording effects  
34  
35 associated with either PW items alone, nor with NW and PW items simultaneously, comparing both  
36  
37 CTCU and CTCM models. So, this work extends the previous work by Molina et al.[36], which  
38  
39 compares the fit of the unidimensional model, the multifactor models and the CTCM and CTCU  
40  
41 unidimensional models with method effects for only the NW items. To clarify this work, Figure 1  
42  
43 (Model 1 to Model 6) shows the 6 CFA models that we consider here in order to test the potential  
44  
45 method effects associated with either the PW items (Models 3 and 4) or both the NW and PW items  
46  
47 (Models 5 and 6). Models 1 and 2 were the best fitted models in Molina et al.[36] and are the base-  
48  
49 models for this study. Three of these models are CTCU models (Models 1, 3 and 5), whereas the  
50  
51 other three are CTCM models (Models 2, 4 and 6). As stressed by Marsh et al.[45], it becomes  
52  
53 necessary to consider this comprehensive set of competing models to determine the relative  
54  
55 importance and substantive nature of the method effects.  
56  
57  
58  
59  
60

## Figure 1

Finally, there has been some research carried out into the demographic correlates of method effects, such as sex[46–50], age[48,51] or educational level[41,52]. With respect to the GHQ–12, to date, we have not found any studies that analyze demographic correlates of method effects.

Building on the previous studies, the first aim of this study was to overcome the limitation pointed out in Molina et al.[36] and examine method effects associated with both positive and negative wording. The second aim was to further understand the meaning of the method factors; therefore, we evaluated the relationships between the method factors and three covariates (i.e., the sex, age, and educational level) in the framework of a structural equation model (SEM).

## Method

### *Participants*

The data used in this study came from the Second Catalonian Survey of Working Conditions[53] and were based on a representative random sample of all employees living in Catalonia (Spain). Data were collected by professional interviewers in private households. The sample comprised a total of 3,050 participants who responded to the GHQ–12 included in the survey (55.4% men and 44.6% women) with a mean age of 40.46 years ( $SD = 11.19$ ; range from 17 to 82).

### *Measures*

The GHQ–12 is a self-report scale that contains 6 PW items (e.g. “Have you been able to face up to problems?”) and 6 NW items (e.g. “Have you been losing confidence in yourself?”). The GHQ–12 was validated in Spain by Lobo and Muñoz[54]. Table 1 shows the statements of these items in the same order as they were presented in the survey. It must be noted that the GHQ–12 has a different response scale for the PW items (i.e.: *more than usual*; *same as usual*; *less than usual*; and *much*



less than usual) and the NW items (i.e.: not at all; no more than usual; rather more than usual; and much more than usual). Accordingly, the 4–point scoring scheme was applied in our study so total scores in the GHQ–12 ranged from 0 to a maximum of 36, with higher scores indicating lower levels of GPH.

Table 1. Descriptive statistics, standardized factor loadings from Model 6 and correlations between the Model 6 factors and the covariates

| Item                                                                         | M    | SD   | Model 6 |       |       |
|------------------------------------------------------------------------------|------|------|---------|-------|-------|
|                                                                              |      |      | GPH     | PW    | NW    |
| Item 1. Able to concentrate                                                  | 1.03 | 0.37 | .49*    | .50*  |       |
| Item 2. Lost sleep over worry                                                | 0.57 | 0.75 | .78*    |       | .13   |
| Item 3. Playing a useful part in things                                      | 0.96 | 0.31 | .09*    | .47*  |       |
| Item 4. Capable of making decisions                                          | 0.96 | 0.30 | .22*    | .76*  |       |
| Item 5. Constantly under strain                                              | 0.71 | 0.79 | .85*    |       | .06   |
| Item 6. Could not overcome difficulties                                      | 0.44 | 0.66 | .71*    |       | .31*  |
| Item 7. Enjoy day-to-day activities                                          | 1.01 | 0.40 | .56*    | .57*  |       |
| Item 8. Face up to problems                                                  | 0.99 | 0.32 | .39*    | .62*  |       |
| Item 9. Feeling unhappy and depressed                                        | 0.37 | 0.66 | .76*    |       | .43*  |
| Item 10. Losing confidence in yourself                                       | 0.19 | 0.48 | .52*    |       | .83*  |
| Item 11. Thinking of yourself as a worthless person                          | 0.12 | 0.40 | .49*    |       | .72*  |
| Item 12. Feeling reasonably happy                                            | 0.99 | 0.38 | .42*    | .58*  |       |
| Correlations between the Model 6 factors and the socio-demographic variables |      |      |         |       |       |
| Sex                                                                          |      |      | .18*    | -.14* | .02   |
| Age                                                                          |      |      | .13*    | .04   | .03   |
| Educational level                                                            |      |      | -.04    | -.13* | -.12* |

Note. M = Mean; SD = Standard Deviation; GPH = General Health Psychology factor; PW = Positive Wording factor; NW = Negative Wording factor. \* $p < .05$

1  
2  
3  
4 For the purposes of exploring the correlates of method effects (i.e., item wording effects),  
5 we used the following three covariates: (a) sex; (b) age; and (c) educational level, which was  
6  
7 measured as a self-reported question with 7 response graduated categories ranging from *incomplete*  
8  
9 *primary studies* to *postgraduate studies*. The educational level was scored as the highest level of  
10  
11 education reached.  
12  
13  
14  
15  
16  
17

### 18 *Statistical Analysis*

19  
20 A set of competing confirmatory factor models were estimated using LISREL 8.70[55]. Figure 1  
21  
22 shows the specification of all these CFA models. Models 1 and 2 are the best fitted in Molina et  
23  
24 al.[36], so they are included here as base-models for the purpose of comparison. These two models  
25  
26 examine the method effect associated with NW items: Model 1 is a unidimensional model with  
27  
28 correlated errors (i.e., a CTCU model); and Model 2 is a unidimensional model with an additional  
29  
30 factor for the NW items (i.e., a CTCM model). Analogously, two models were estimated as a means  
31  
32 of examining the method effects associated with PW items (Models 3 and 4, respectively). Finally,  
33  
34 Model 5 and Model 6 take into account the method effects associated with both NW and PW items:  
35  
36 the former as a CTCU model, the latter as a CTCM model.  
37  
38  
39  
40

41 The goodness-of-fit indices computed were: the chi-square statistic; the Comparative Fit  
42  
43 Index (CFI); the Tucker-Lewis Index (TLI); the root mean square error of approximation (RMSEA)  
44  
45 with its 90% confidence interval; the standardized root mean square residual (SRMR); and the  
46  
47 Akaike information criterion (AIC). Values greater than 0.95 for CFI and TLI, and lower than 0.06  
48  
49 and 0.08 for RMSEA and SRMR, respectively, are considered to indicate good model fit. The  
50  
51 model with the lowest AIC is considered to be the best one. Moreover, the chi-square difference  
52  
53 test was computed to decide between competing nested models.  
54  
55  
56

57 As concerns the estimation of CFA models, most studies into the GHQ-12 factor structure  
58  
59 have used maximum likelihood[16,31,35,40,44]. This estimation method relies on several  
60

assumptions which should be met to be confident about the results obtained. This is the case of the assumption of multivariate normality which implies, first, that the variables are continuous in nature and, second, that the joint distribution of the variables is normal. The first condition is unlikely to be met with the GHQ–12 Likert–type response data; nor is the second if the variables depart markedly from normality as is the case for the responses to the NW items which were heavily positively skewed (see Figure 2). An alternative when these conditions are not met is to use the weighted least squares (WLS) estimator[56], which has already been used in some studies about the GHQ–12 factor structure[13,18,20,29] and it will be the estimation method used here. Thus, the various CFA models were estimated using WLS, after computing the respective polychoric correlation and asymptotic covariance matrices.

Finally, correlates of the GHQ–12 factors were evaluated using SEM through the inclusion in the finally selected model of the 3 covariates considered in this study: sex was treated as categorical, whereas age and educational level were treated as continuous variables.

## Figure 2

## Results

The goodness–of–fit statistics obtained for the 6 models compared here are shown in Table 2.

Table 2. *Fit indexes for the alternative models of the 12–item General Health Questionnaire*

| <i>Models</i>  | <i>df</i> | <i>Chi-square</i> | <i>CFI</i> | <i>RMSEA [90% CI]</i> | <i>TLI</i> | <i>SRMR</i> | <i>AIC</i> |
|----------------|-----------|-------------------|------------|-----------------------|------------|-------------|------------|
| <i>Model 1</i> | 39        | 226.96            | .99        | .041 [.036, .046]     | .97        | .082        | 304.96     |
| <i>Model 2</i> | 48        | 458.86            | .97        | .054 [.050, .059]     | .96        | .095        | 518.86     |
| <i>Model 3</i> | 39        | 371.93            | .97        | .054 [.049, .059]     | .96        | .120        | 449.93     |
| <i>Model 4</i> | 48        | 435.32            | .97        | .052 [.048, .057]     | .96        | .140        | 495.32     |
| <i>Model 6</i> | 41        | 152.41            | .99        | .030 [.025, .036]     | .99        | .072        | 226.41     |

*Note.* Models are specified in Figure 1. CFI = Comparative Fit Index; RMSEA = Root Mean Square Error of Approximation; CI = Confidence Interval; TLI = Tucker–Lewis Index; SRMR = Standardized Root Mean Square Residual; AIC = Akaike Information Criteria

1  
2  
3  
4  
5 As for the comparison of the models that include a latent method factor for the NW or the  
6  
7  
8 PW items (Models 2 and 4, respectively), it may be observed that both models demonstrated a  
9  
10 similar fit according to all the goodness-of-fit indices, except for the SRMR that was lower for  
11  
12 Model 5, but above the cut point of 0.08. However, when comparing the corresponding CTCU  
13  
14 models (Models 1 and 3), the model that includes the correlated uniquenesses among the NW items  
15  
16 (Model 1) fitted better than the model that includes the correlated uniquenesses among the PW  
17  
18 items (Model 3) according to all the fit indices –significantly better if we compare their respective  
19  
20 RMSEA 90% ICs. Model 5 did not converge to a fully proper solution, thereby making it  
21  
22 impossible either to compare Model 5 with its nested models (Models 1 and 3), or to compare it  
23  
24 with Model 6. Finally, Model 6, which includes two method factors for the PW and the NW items,  
25  
26 was the model which provided the best fit according to all the fit indices. When comparing Model 6  
27  
28 with the nested Models 2 and 4, the chi-square difference test was statistically significant for both  
29  
30 comparisons (306.45 (7);  $p < .001$  for Models 2 and 6; and 282.91 (7);  $p < .001$  for Models 4 and  
31  
32 6). An in-depth inspection of the parameter estimates in Model 6 (see Table 1) showed that all  
33  
34 factor loadings were statistically significant for the three factors, except for items 2 and 5 in the  
35  
36 method factor comprising the NW items. The correlation between the two method factors was also  
37  
38 statistically significant ( $r = .20$ ).  
39  
40  
41  
42  
43

44 Finally, a statistical analysis of the relationships between the latent factors in Model 6 and  
45  
46 the 3 covariates considered in this study (i.e. sex, age and educational level) was performed through  
47  
48 a SEM in which the correlations between the 3 latent factors in Model 6 and the 3 covariates were  
49  
50 freely estimated, the focus being on the relationships between the method factors and the covariates.  
51  
52 The model fit was good (RMSEA = .034; RMSEA 90% IC = [.030, .038]; CFI = .98; NNFI = .97;  
53  
54 SRMR = .079). As can be seen in Table 1, the correlations of age with the method factors were near  
55  
56 to 0 and statistically non-significant. However, sex was significantly correlated with the method  
57  
58  
59  
60

1  
2  
3 factor associated with PW items (–.14), whereas the educational level was significantly related to  
4  
5 both method factors (–.12 and –.13). Thus, men and women differ in the way they answer PW  
6  
7 items, meaning that men are more likely than women to endorse PW items. Additionally, subjects  
8  
9 with higher educational levels are less prone to showing a bias associated with the wording of  
10  
11 items, regardless of whether the items are positively or negatively worded.  
12  
13  
14  
15  
16

## 17 **Discussion**

18  
19 This study focused on the examination of the latent structure underlying the responses to the GHQ–  
20  
21 12, considering the role of method effects associated with both, positive and negative items  
22  
23 wording, and using two alternative parameterizations of the CFA measurement models. What  
24  
25 should first be noted is that the studies that have included method effects in the measurement model  
26  
27 of the GHQ–12 have been more the exception than the rule in previous research into the factor  
28  
29 structure of this questionnaire.  
30  
31  
32

33 According to the results of the present study, we conclude that the GHQ–12 factor structure  
34  
35 is best characterized by introducing latent method factors that capture both the method effects  
36  
37 associated with NW and PW items (Model 6). Moreover, the statistically significant correlation  
38  
39 between the two method factors ( $r = .20$ ) suggests, as was the case in the work by Van Dam et  
40  
41 al.[57] on the Five Facet Mindfulness Questionnaire, that respondents susceptible to negative  
42  
43 method effects are also susceptible to positive method effects. These results support the conclusion  
44  
45 from previous research that the good fit obtained by multidimensional models (mainly the two–  
46  
47 factor model and the three–factor Graetz’s model,) could simply be explained by the artificial  
48  
49 grouping of PW and NW items.  
50  
51  
52

53 The second aim of this study was to examine the relationships between the method factors  
54  
55 associated with both NW and PW items and three demographic variables, namely, the sex, age and  
56  
57 educational level of the respondents. Regarding the sex, we found a statistically significant, but  
58  
59  
60

1  
2  
3 weak, relationship between PW and sex, so that men were more likely than women to endorse PW  
4  
5 items. These results are in line with previous works that, in the context of RSES, have found sex  
6  
7 differences in wording effects[49,50]. As for the explanatory role of age on method effects, we  
8  
9 found that the relationship between age and the negative wording effect was not statistically  
10  
11 significant, which supports previous research using other questionnaires (e.g., self-esteem  
12  
13 scales,[58]; Hospital Anxiety & Depression Scale,[59]). However, our results give no support to  
14  
15 previous studies which had stated that, in older adults, the strongest method effects would be  
16  
17 associated with PW items, rather than NW items[48,51].  
18  
19  
20

21  
22 As to the educational level, we found that there was a significant correlation of this variable  
23  
24 on the two method factors, so that less educated participants were more prone to showing a bias  
25  
26 associated with the wording of the items, regardless of whether the items were positively or  
27  
28 negatively worded, while more educated respondents would treat negatively and positively worded  
29  
30 items more equally. This result supports and extends the evidence obtained in previous research on  
31  
32 the relationship of the negative wording factor and the educational level/verbal ability with different  
33  
34 questionnaires and samples[41,59–64]. The size of the effects found in this work (–.13 and –.12)  
35  
36 were similar to those found in Wouters et al.[59] for the NW items (–.12 to –.15 for models with a  
37  
38 different number of trait factors). Contrary to the above results, Tomás et al.[58] found that the  
39  
40 educational level of the respondents had no effect on the negative method factor using self-esteem  
41  
42 questionnaires; however, as they pointed out, the indicator used was a coarse measure of this  
43  
44 variable and more research would be desirable, making use of more reliable indicators.  
45  
46  
47  
48

49  
50 Taken together, the results on the individual differences related to the demographic variables  
51  
52 considered in this study cannot only help to understand the presence of wording method effects but  
53  
54 also to identify respondents who are prone to answering PW and NW items differently. In this  
55  
56 sense, the relationship that appears as more evident is for the educational level. The relationship that  
57  
58 appears as more evident in previous works with other questionnaires and in the present work, is for  
59  
60

1  
2  
3 the educational level, suggesting that the effect of educational level on the responses to NW and  
4  
5 PW items could be invariant instead of questionnaire-specific; further research is needed in this  
6  
7 regard.  
8  
9

10 Another practical consequence of our study concerns the relationship between the intended  
11  
12 measure of the GHQ-12 (i.e., the GPH factor) and other constructs of interest. Several studies have  
13  
14 shown that method effects can inflate, deflate or have no effect at all on estimates of the relationship  
15  
16 between two constructs (see Podsakoff[65], for a further review of the effects that method biases  
17  
18 have on individual measures and on the covariation between different constructs). Thus, it is  
19  
20 desirable that both the constructs of interest as well as the effects of method factors, like positive  
21  
22 and negative wording, are considered in SEM models as a means of controlling these systematic  
23  
24 sources of bias and, thus, avoiding the drawing of inaccurate conclusions about the relationships  
25  
26 between the substantive factors.  
27  
28  
29

30 As was the case in Hankins[31], it is interesting to note that we found more extreme scores  
31  
32 for NW than for PW items, so that the overall mean for NW items was lower (0.40) than that for  
33  
34 PW items (0.99). Thus, it follows that the respondents assessed their psychological health more  
35  
36 positively when answering NW items than when answering PW items. This asymmetry in the  
37  
38 participants' responses as a function of the wording of the items is consistent with results from  
39  
40 previous research into wording effects for contrastive survey questions[66]. The extent to which the  
41  
42 presence of method effects is linked to this asymmetric pattern of responses to PW and NW items in  
43  
44 the GHQ-12 should be examined in future research.  
45  
46  
47  
48

49 Comparing the current work with previous studies into the factorial structure of the GHQ-  
50  
51 12, to our knowledge, this is the first study that, on the one hand, tests a comprehensive set of  
52  
53 models including method effects associated with both PW and NW items and also explores some  
54  
55 demographic correlates of these method effects. Another strength of this work was the fact that it  
56  
57 used a large representative sample of workers, but the results might not be generalized to other  
58  
59  
60

1  
2  
3 specific populations, for example, adolescents and elderly retired people.  
4  
5  
6  
7  
8  
9  
10  
11  
12  
13  
14  
15  
16  
17  
18  
19  
20  
21  
22  
23  
24  
25  
26  
27  
28  
29  
30  
31  
32  
33  
34  
35  
36  
37  
38  
39  
40  
41  
42  
43  
44  
45  
46  
47  
48  
49  
50  
51  
52  
53  
54  
55  
56  
57  
58  
59  
60



1  
2  
3  
4  
5  
6  
7  
8  
9  
10  
11  
12  
13  
14  
15  
16  
17  
18  
19  
20  
21  
22  
23  
24  
25  
26  
27  
28  
29  
30  
31  
32  
33  
34  
35  
36  
37  
38  
39  
40  
41  
42  
43  
44  
45  
46  
47  
48  
49  
50  
51  
52  
53  
54  
55  
56  
57  
58  
59  
60

## **Funding**

This work was supported by the Grant PGC2018-100675-B-I00, Spanish Ministry of Science, Innovation and Universities (Spain). The funders had no role in the study design, data collection and analysis, decision to publish, or preparation of the manuscript.

## **Competing interests**

No conflict of interest has been declared by the authors.

## **Contributors**

All authors meet the criteria recommended by the International Committee of Medical Journal Editors, ICMJE. All authors made substantial contributions to conception and design, acquisition of data, or analysis and interpretation of data. GM and MFR: drafted the article. JV and J-ML: critically revised the draft for important intellectual content. All authors agreed on the final version.

## References

- 1 Goldberg DP. *The detection of psychiatric illness by questionnaire*. London: : Oxford University Press 1972.
- 2 Goldberg DP, Williams P. *A user's guide to the General Health Questionnaire*. Windsor, United Kingdom: : NFER-Nelson 1988.
- 3 Bhui K, Bhugra D, Goldberg D. Cross-cultural validity of the Amritsar Depression Inventory and the General Health Questionnaire amongst English and Punjabi primary care attenders. *Soc Psychiatry Psychiatr Epidemiol* 2000;**35**:248–54.
- 4 Daradkeh TK, Ghubash R, El-Rufaie O. Reliability, validity, and factor structure of the Arabic version of the 12-item General Health Questionnaire. *Psychol Rep* 2001;**89**:85–94.
- 5 Gelaye B, Tadesse MG, Lohsoonthorn V, *et al*. Psychometric properties and factor structure of the General Health Questionnaire as a screening tool for anxiety and depressive symptoms in a multi-national study of young adults. *J Affect Disord* 2015;**187**:197–202. doi:10.1016/J.JAD.2015.08.045
- 6 Goldberg DP, Gater R, Sartorius N, *et al*. The validity of two versions of the GHQ in the WHO study of mental illness in general health care. *Psychol Med* 1997;**27**:191–7.
- 7 Lundin A, Hallgren M, Theobald H, *et al*. Validity of the 12-item version of the General Health Questionnaire in detecting depression in the general population. *Public Health* 2016;**136**:66–74. doi:10.1016/J.PUHE.2016.03.005
- 8 Rocha K, Pérez K, Rodríguez-Sanz M, *et al*. Propiedades psicométricas y valores normativos del General Health Questionnaire (GHQ-12) en población general española. *Int J Clin Heal Psychol* 2011;**11**:125–39.
- 9 Sanchez-Lopez MP, Dresch V. The 12-item General Health Questionnaire (GHQ-12): Reliability, external validity and factor structure in the Spanish population. *Psicothema* 2008;**20**:839–43.
- 10 Schmitz N, Kruse J, Tress W. Psychometric properties of the General Health Questionnaire

1  
2  
3  
4  
5  
6  
7  
8  
9  
10  
11  
12  
13  
14  
15  
16  
17  
18  
19  
20  
21  
22  
23  
24  
25  
26  
27  
28  
29  
30  
31  
32  
33  
34  
35  
36  
37  
38  
39  
40  
41  
42  
43  
44  
45  
46  
47  
48  
49  
50  
51  
52  
53  
54  
55  
56  
57  
58  
59  
60

(GHQ-12) in a German primary care sample. *Acta Psychiatr Scand* 1999;**100**:462–8.

11 Tait RJ, French DJ, Hulse GK. Validity and psychometric properties of the General Health Questionnaire-12 in young Australian adolescents. *Aust N Z J Psychiatry* 2003;**37**:374–81.

12 Graetz B. Multidimensional properties of the General Health Questionnaire. *Soc Psychiatry Psychiatr Epidemiol* 1991;**26**:132–8.

13 Campbell A, Knowles S. A confirmatory factor analysis of the GHQ12 using a large Australian sample. *Eur J Psychol Assess* 2007;**23**:2–8.

14 Cheung YB. A confirmatory factor analysis of the 12-item General Health Questionnaire among older people. *Int J Geriatr Psychiatry* 2002;**17**:739–44.

15 French DJ, Tait RJ. Measurement invariance in the General Health Questionnaire-12 in young Australian adolescents. *Eur Child Adolesc Psychiatry* 2004;**13**:1–7.

16 Gao F, Luo N, Thumboo J, *et al*. Does the 12-item General Health Questionnaire contain multiple factors and do we need them? *Health Qual Life Outcomes* 2004;**2**:1–7.  
doi:10.1186/1477-7525-2-63

17 Mäkikangas A, Feldt T, Kinnunen U, *et al*. The factor structure and factorial invariance of the 12-item General Health Questionnaire (GHQ-12) across time: Evidence from two community-based samples. *Psychol Assess* 2006;**18**:444–51.

18 Padrón A, Galán I, Durbán M, *et al*. Confirmatory factor analysis of the General Health Questionnaire (GHQ-12) in Spanish adolescents. *Qual Life Res* 2012;**21**:1291–8.

19 Penninkilampi-Kerola V, Miettunen J, Ebeling H. Health and disability: A comparative assessment of the factor structures and psychometric properties of the GHQ-12 and the GHQ-20 based on data from a Finnish population-based sample. *Scand J Psychol* 2006;**47**:431–40.

20 Shevlin M, Adamson G. Alternative factor models and factorial invariance of the GHQ-12: A large sample analysis using confirmatory factor analysis. *Psychol Assess* 2005;**17**:231–6.

- 1  
2  
3 21 Martin CR, Newell RJ. The factor structure of the 12-item General Health Questionnaire in  
4 individuals with facial disfigurement. *J Psychosom Res* 2005;**59**:193–9.  
5  
6 doi:10.1016/j.jpsychores.2005.02.020  
7  
8  
9  
10 22 Tomás JM, Meléndez JC, Oliver A, *et al.* Efectos de método en las escalas de Ryff: Un  
11 estudio en población de personas mayores. *Psicológica* 2010;**31**:383–400.  
12  
13  
14 23 Andrich D, Van Schoubroeck L. The General Health Questionnaire: a psychometric analysis  
15 using latent trait theory. *Psychol Med* 1989;**19**:469–85.  
16  
17  
18  
19 24 Gao W, Stark D, Bennett MI, *et al.* Using the 12-item General Health Questionnaire to  
20 screen psychological distress from survivorship to end-of-life care: Dimensionality and item  
21 quality. *Psychooncology* 2012;**21**:954–61.  
22  
23  
24  
25 25 Glozah FN, Pevalin DJ. Factor structure and psychometric properties of the General Health  
26 Questionnaire (GHQ-12) among Ghanaian adolescents. *J Child Adolesc Ment Heal*  
27 2015;**27**:53–7. doi:10.2989/17280583.2015.1007867  
28  
29  
30  
31  
32 26 Kilic C, Rezaki M, Rezaki B, *et al.* General Health Questionnaire (GHQ-12 & GHQ-28):  
33 Psychometric properties and factor structure of the scales in a Turkish primary care sample.  
34 *Soc Psychiatry Psychiatr Epidemiol* 1997;**32**:327.  
35  
36  
37  
38  
39 27 Picardi A, Abeni D, Pasquini P. Assessing psychological distress in patients with skin  
40 diseases: Reliability, validity and factor structure of the GHQ-12. *Eur Acad Dermatology*  
41 *Venereol* 2001;**15**:410.  
42  
43  
44  
45  
46 28 Werneke U, Goldberg DP, Yalcin I, *et al.* The stability of the factor structure of the General  
47 Health Questionnaire. *Psychol Med* 2000;**30**:823.  
48  
49  
50  
51 29 Aguado J, Campbell A, Ascaso C, *et al.* Examining the factor structure and discriminant  
52 validity of the 12-item General Health Questionnaire (GHQ-12) among Spanish post-partum  
53 women. *Assessment* 2012;**19**:517–25.  
54  
55  
56  
57  
58 30 Ye S. Factor structure of the General Health Questionnaire (GHQ-12): The role of wording  
59  
60

1  
2  
3  
4  
5  
6  
7  
8  
9  
10  
11  
12  
13  
14  
15  
16  
17  
18  
19  
20  
21  
22  
23  
24  
25  
26  
27  
28  
29  
30  
31  
32  
33  
34  
35  
36  
37  
38  
39  
40  
41  
42  
43  
44  
45  
46  
47  
48  
49  
50  
51  
52  
53  
54  
55  
56  
57  
58  
59  
60

effects. *Pers Individ Dif* 2009;**46**:197–201.

- 31 Hankins M. The factor structure of the twelve item General Health Questionnaire (GHQ-12): the result of negative phrasing? *Clin Pract Epidemiol Ment Heal* 2008;**4**:10.
- 32 Harvey RJ, Billings RS, Nilan KJ. Confirmatory factor analysis of the Job Diagnostic Survey: Good news and bad news. *J Appl Psychol* 1985;**70**:461–8.
- 33 Smith N, Stults DM. Factors defined by negatively keyed items: The results of careless respondents? *Appl Psychol Meas* 1985;**9**:367–73.
- 34 Abubakar A, Fischer R. The factor structure of the 12-item General Health Questionnaire in a literate Kenyan population. *Stress Heal J Int Soc Investig Stress* 2012;**28**:248–54.
- 35 Fernandes HM, Vasconcelos-Raposo J. Factorial validity and invariance of the GHQ-12 among clinical and nonclinical samples. *Assessment* 2013;**20**:219–29.  
doi:<http://dx.doi.org/10.1177/1073191112465768>
- 36 Molina JG, Rodrigo MF, Losilla J-M, *et al.* Wording effects and the factor structure of the 12-item General Health Questionnaire (GHQ-12). *Psychol Assess* 2014;**26**:1031–1037.  
doi:10.1037/a0036472
- 37 Motamed N, Edalatian Zakeri S, Rabiee B, *et al.* The Factor Structure of the Twelve Items General Health Questionnaire (GHQ-12): a Population Based Study. *Appl Res Qual Life* 2018;**13**:303–16. doi:10.1007/s11482-017-9522-y
- 38 Rey JJ, Abad FJ, Barrada JR, *et al.* The impact of ambiguous response categories on the factor structure of the GHQ–12. *Psychol Assess* 2014;**26**:1021–30. doi:10.1037/a0036468
- 39 Romppel M, Braehler E, Roth M, *et al.* What is the General Health Questionnaire-12 assessing? *Compr Psychiatry* 2013;**54**:406–13. doi:10.1016/j.comppsy.2012.10.010
- 40 Smith AB, Oluboyede Y, West R, *et al.* The factor structure of the GHQ-12: The interaction between item phrasing, variance and levels of distress. *Qual Life Res An Int J Qual Life Asp Treat Care Rehabil* 2013;**22**:145–52.

- 1  
2  
3 41 Marsh HW. Negative item bias in ratings scales for preadolescent children: A cognitive-  
4  
5 developmental phenomenon. *Dev Psychol* 1986;**22**:37–49.  
6  
7  
8 42 Tomás JM, Oliver A. Rosenberg’s Self-Esteem Scale: Two factors or method effects. *Struct*  
9  
10 *Equ Model A Multidiscip J* 1999;**6**:84–98.  
11  
12 43 Gnambs T, Staufenbiel T. The structure of the General Health Questionnaire (GHQ-12): two  
13  
14 meta-analytic factor analyses. *Health Psychol Rev* 2018;**12**:179–94.  
15  
16  
17 doi:10.1080/17437199.2018.1426484  
18  
19 44 Wang L, Lin W. Wording effects and the dimensionality of the General Health Questionnaire  
20  
21 (GHQ-12). *Pers Individ Dif* 2011;**50**:1056–61.  
22  
23  
24 45 Marsh HW, Scalas LF, Nagengast B. Longitudinal tests of competing factor structures for the  
25  
26 Rosenberg Self-Esteem Scale: Traits, ephemeral artifacts, and stable response styles. *Psychol*  
27  
28 *Assess* 2010;**22**:366–81.  
29  
30  
31 46 DiStefano C, Motl RW. Self-Esteem and method effects associated with negatively worded  
32  
33 items: Investigating factorial invariance by sex. *Struct Equ Model A Multidiscip J*  
34  
35 2009;**16**:134–46.  
36  
37  
38 47 Gana K, Saada Y, Bailly N, *et al.* Longitudinal factorial invariance of the Rosenberg Self-  
39  
40 Esteem Scale: Determining the nature of method effects due to item wording. *J Res Pers*  
41  
42 2013;**47**:406–16.  
43  
44  
45 48 Lindwall M, Barkoukis V, Grano C, *et al.* Method effects: The problem with negatively  
46  
47 versus positively keyed items. *J Pers Assess* 2012;**94**:196–204.  
48  
49  
50 49 Michaelides MP, Zenger M, Koutsogiorgi C, *et al.* Personality correlates and gender  
51  
52 invariance of wording effects in the German version of the Rosenberg Self-Esteem Scale.  
53  
54 *Pers Individ Dif* 2016;**97**:13–8. doi:10.1016/J.PAID.2016.03.011  
55  
56 50 Urbán R, Szigeti R, Kökönyei G, *et al.* Global self-esteem and method effects: Competing  
57  
58 factor structures, longitudinal invariance, and response styles in adolescents. *Behav Res*  
59  
60

1  
2  
3  
4  
5  
6  
7  
8  
9  
10  
11  
12  
13  
14  
15  
16  
17  
18  
19  
20  
21  
22  
23  
24  
25  
26  
27  
28  
29  
30  
31  
32  
33  
34  
35  
36  
37  
38  
39  
40  
41  
42  
43  
44  
45  
46  
47  
48  
49  
50  
51  
52  
53  
54  
55  
56  
57  
58  
59  
60

*Methods* 2014;**46**:488–98. doi:10.3758/s13428-013-0391-5

- 51 Mullen SP, Gothe NP, McAuley E. Evaluation of the factor structure of the Rosenberg Self-  
Esteem Scale in older adults. *Pers Individ Dif* 2013;**54**:153–7.
- 52 Marsh HW. Positive and negative global self-esteem: A substantively meaningful distinction  
or artifactors? *J Pers Soc Psychol* 1996;**70**:810–9. doi:10.1037/0022-3514.70.4.810
- 53 Catalanian Labor Relations and Quality of Work Department. *Segunda Encuesta Catalana  
de Condiciones de Trabajo [Second Catalanian Survey of Working Conditions]*. Barcelona: :  
Autor 2012.
- 54 Lobo A, Muñoz PE. Versiones en lengua española validadas. In: Goldberg D, Williams P,  
eds. *Cuestionario de Salud General GHQ (General Health Questionnaire)*. Guía para el  
usuario de las distintas versiones [Guide for the use of the different validated versions in  
Spanish language]. Barcelona, Spain: : Editorial Masson 1996.
- 55 Jöreskog K, Sörbom D. *Lisrel 8.70*. Chicago: : Scientific Software International Inc 2004.
- 56 Browne MW. Asymptotic distribution free methods in the analysis of covariance structures.  
*Br J Math Stat Psychol* 1984;**37**:62–83.
- 57 Van Dam NT, Hobkirk AL, Danoff-Burg S, *et al*. Mind your words: Positive and negative  
items create method effects on the Five Facet Mindfulness Questionnaire. *Assessment*  
2012;**19**:198–204. doi:http://dx.doi.org/10.1177/1073191112438743
- 58 Tomás JM, Oliver A, Galiana L, *et al*. Explaining method effects associated with negatively  
worded items in trait and state global and domain-specific self-esteem scales. *Struct Equ  
Model A Multidiscip J* 2013;**20**:299–313.
- 59 Wouters E, Booyens F le R, Ponnet K, *et al*. Wording Effects and the Factor Structure of the  
Hospital Anxiety & Depression Scale in HIV/AIDS Patients on Antiretroviral  
Treatment in South Africa. *PLoS One* 2012;**7**:1–7. doi:10.1371/journal.pone.0034881
- 60 Bors DA, Vigneau FO, Lalande F. Measuring the Need for Cognition: Item polarity,

- 1  
2  
3 dimensionality, and the relation with ability. *Pers Individ Dif* 2006;**40**:819–28.  
4  
5  
6 61 Chen YH, Rendina-Gobioff G, Dedrick RF. Factorial Invariance of a Chinese Self-Esteem  
7  
8 Scale for Third and Sixth Grade Students: Evaluating Method Effects Associated with  
9  
10 Positively and Negatively Worded Items. *Int J Educ Psychol Assess* 2010;**6**:21–35.  
11  
12 62 Corwyn RF. The factor structure of global self-esteem among adolescents and adults. *J Res*  
13  
14 *Pers* 2000;**34**:357–79.  
15  
16  
17 63 Rammstedt B, Goldberg LR, Borg I. The measurement equivalence of Big-Five factor  
18  
19 markers for persons with different levels of education. *J Res Pers* 2010;**44**:53–61.  
20  
21 64 Schmitt DP, Allik J. Simultaneous administration of the Rosenberg Self-Esteem Scale in 53  
22  
23 nations: Exploring the universal and culture-specific features of global self-esteem. *J Pers*  
24  
25 *Soc Psychol* 2005;**89**:623–42.  
26  
27  
28 65 Podsakoff PM, MacKenzie SB, Podsakoff NP. Sources of method bias in social science  
29  
30 research and recommendations on how to control it. *Annu Rev Psychol* 2012;**63**:539–69.  
31  
32  
33 66 Kamoen N, Holleman B, Mak P, *et al.* Agree or Disagree? Cognitive Processes in Answering  
34  
35 Contrastive Survey Questions. *Discourse Process* 2011;**48**:355–85.  
36  
37  
38 doi:10.1080/0163853X.2011.578910  
39  
40  
41  
42  
43  
44  
45  
46  
47  
48  
49  
50  
51  
52  
53  
54  
55  
56  
57  
58  
59  
60



1  
2  
3  
4 →FILE Figure1.pdf  
5  
6

7 *Figure 1.* Competing models tested for the 12–Item General Health Questionnaire. Underlined numbers identify negatively  
8 worded items. GPH: General Psychological Health factor; NW: Method factor associated with negatively worded items;  
9  
10 PW: Method factor associated with positively worded items.  
11  
12  
13  
14  
15  
16  
17  
18  
19  
20  
21  
22  
23  
24  
25  
26  
27  
28  
29  
30  
31  
32  
33  
34  
35  
36  
37  
38  
39  
40  
41  
42  
43  
44  
45  
46  
47  
48  
49  
50  
51  
52  
53  
54  
55  
56  
57  
58  
59  
60

1  
2  
3  
4  
5  
6  
7  
8  
9  
10  
11  
12  
13  
14  
15  
16  
17  
18  
19  
20  
21  
22  
23  
24  
25  
26  
27  
28  
29  
30  
31  
32  
33  
34  
35  
36  
37  
38  
39  
40  
41  
42  
43  
44  
45  
46  
47  
48  
49  
50  
51  
52  
53  
54  
55  
56  
57  
58  
59  
60

→FILE Figure2.pdf

*Figure 2.* Bar charts of the response distributions for the 12-item General Health Questionnaire. Responses were given on a different 4-point response scale for the positively worded items (0 = *better than usual*, 1 = *same as usual*, 2 = *less than usual*, 3 = *much less than usual*) and for the negatively worded items (0 = *not at all*, 1 = *no more than usual*, 2 = *more than usual*, 3 = *much more than usual*).

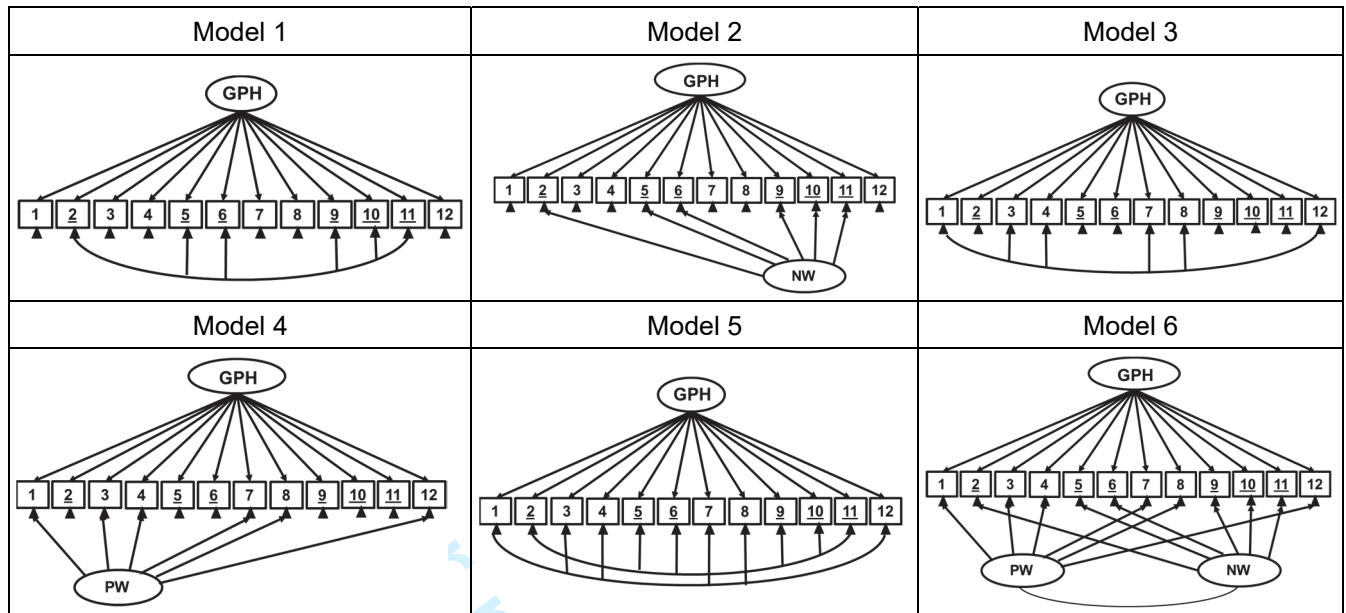

Figure 1. Competing models tested for the 12-Item General Health Questionnaire. Underlined numbers identify negatively worded items. GPH: General Psychological Health factor; NW: Method factor associated with negatively worded items; PW: Method factor associated with positively worded items.

Positively worded items

Negatively worded items

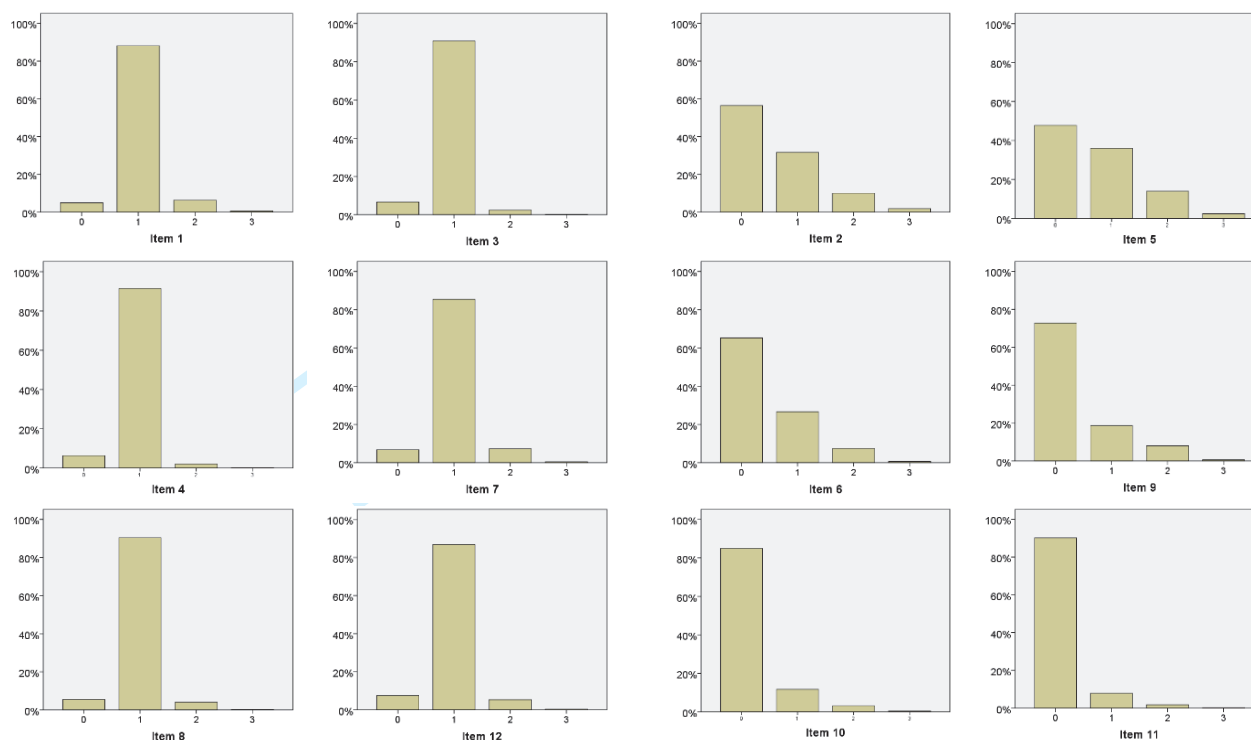

Figure 2. Bar charts of the response distributions for the 12-item General Health Questionnaire. Responses were given on a different 4-point response scale for the positively worded items (0 = better than usual, 1 = same as usual, 2 = less than usual, 3 = much less than usual) and for the negatively worded items (0 = not at all, 1 = no more than usual, 2 = more than usual, 3 = much more than usual).

# BMJ Open

## Method Effects Associated with Negatively and Positively Worded Items on the 12-Item General Health Questionnaire (GHQ-12): results from a cross-sectional survey with a representative sample of Catalanian workers

|                                 |                                                                                                                                                                                                                                                |
|---------------------------------|------------------------------------------------------------------------------------------------------------------------------------------------------------------------------------------------------------------------------------------------|
| Journal:                        | <i>BMJ Open</i>                                                                                                                                                                                                                                |
| Manuscript ID                   | bmjopen-2019-031859.R1                                                                                                                                                                                                                         |
| Article Type:                   | Original research                                                                                                                                                                                                                              |
| Date Submitted by the Author:   | 30-Jul-2019                                                                                                                                                                                                                                    |
| Complete List of Authors:       | Rodrigo, Maria F.; University of Valencia<br>Molina, J. Gabriel; University of Valencia<br>Losilla, Josep-Maria; Autonomous University of Barcelona<br>Vives, Jaume; Autonomous University of Barcelona<br>Tomás, José; University of Valencia |
| <b>Primary Subject Heading</b>: | Mental health                                                                                                                                                                                                                                  |
| Secondary Subject Heading:      | Research methods, Mental health                                                                                                                                                                                                                |
| Keywords:                       | psychological health, General Health Questionnaire (GHQ-12), method effects, item wording effects, confirmatory factor analysis                                                                                                                |
|                                 |                                                                                                                                                                                                                                                |

SCHOLARONE™  
Manuscripts

1  
2  
3  
4  
5  
6  
7  
8  
9  
10  
11  
12  
13  
14  
15  
16  
17  
18  
19  
20  
21  
22  
23  
24  
25  
26  
27  
28  
29  
30  
31  
32  
33  
34  
35  
36  
37  
38  
39  
40  
41  
42  
43  
44  
45  
46  
47  
48  
49  
50  
51  
52  
53  
54  
55  
56  
57  
58  
59  
60

1 **Title**

2 Method Effects Associated with Negatively and Positively Worded Items on the 12-Item General  
3 Health Questionnaire (GHQ-12): results from a cross-sectional survey with a representative  
4 sample of Catalanian workers

6 2. Authors and affiliation

7 Rodrigo, Maria F.  
8 Department of Methodology for the Behavioral Sciences  
9 University of Valencia  
10 Valencia (Spain)

12 Molina, J. Gabriel †  
13 Department of Methodology for the Behavioral Sciences  
14 University of Valencia  
15 Valencia (Spain)

17 Losilla, Josep-Maria  
18 Department of Psychobiology and Methodology of Health Sciences  
19 Universitat Autònoma de Barcelona  
20 Barcelona (Spain)

22 Vives, Jaume  
23 Department of Psychobiology and Methodology of Health Sciences  
24 Universitat Autònoma de Barcelona  
25 Barcelona (Spain)

27 Tomás, José M.  
28 Department of Methodology for the Behavioral Sciences  
29 University of Valencia  
30 Valencia (Spain)

32 †Deceased September 26, 2014

34 3. Word count, excluding title page, abstract, references, figures and tables: 3119

36 4. Authors' statements

37 All authors have agreed to authorship in the indicated order.

38 All authors declare that this paper is an original unpublished work and it is not being submitted  
39 elsewhere.

40 All authors do not have any financial interests that might be interpreted as influencing the research,  
41 and APA ethical standard were followed in the conduct of the study.

1  
2  
3 1 The research was not submitted to approval by an institutional review board since this is not a  
4 2 requirement at our universities for this type of study.  
5 3  
6

7 4 5. Data availability statement

8 5 Data is publicly available upon request to the Catalan Labor Relations and Quality of Work  
9  
10 6 Department.

11 7  
12  
13 8 6. Contact information for the corresponding author:

14 9 Jaume Vives

15 10 Department of Psychobiology and Methodology of Health Sciences

16 11 Universitat Autònoma de Barcelona

17 12 Edifici B - Despatx B5b/081

18 13 Carrer de la Fortuna / Carrer de Ca n'Altayó. Campus de la UAB

19 14 08193 Bellaterra (Cerdanyola del Vallès). Barcelona (Spain)

20 15 E-mail: jaume.vives@uab.cat

21 16 Phone: +34 93 581 23 31  
22  
23  
24  
25  
26  
27  
28  
29  
30  
31  
32  
33  
34  
35  
36  
37  
38  
39  
40  
41  
42  
43  
44  
45  
46  
47  
48  
49  
50  
51  
52  
53  
54  
55  
56  
57  
58  
59  
60

## 1           2 3   1   **Abstract**

4  
5   2   **Objective.** Recent studies into the factorial structure of the 12-item version of the General Health  
6  
7   3   Questionnaire (GHQ-12) have shown that it was best represented by a single substantive factor  
8  
9   4   when method effects associated with negatively worded (NW) items are considered. The purpose of  
10  
11   5   the present study was to examine the presence of method effects, and their relationships with  
12  
13   6   demographic covariates, associated with positively worded (PW) and/or NW items.  
14

15  
16  
17   7   **Method.** The current work compared a comprehensive set of confirmatory factor models, including  
18  
19   8   method effects associated with PW and/or NW items with GHQ-12 responses using a random  
20  
21   9   sample of 3050 workers.  
22

23  
24   10   **Results.** A confirmatory factor analysis showed that the best-fitting model was a unidimensional  
25  
26   11   model with two additional uncorrelated method factors associated with PW and NW items.  
27  
28   12   Furthermore, structural equation modeling revealed that method effects were differentially related  
29  
30   13   to both the sex and age of the respondents.  
31

32  
33   14   **Conclusion.** Individual differences related to sex and age can help to identify respondents who are  
34  
35   15   prone to answering PW and NW items differently. Consequently, it is desirable that both the  
36  
37   16   constructs of interest as well as the effects of method factors are considered in SEM models as a  
38  
39   17   means of avoiding the drawing of inaccurate conclusions about the relationships between the  
40  
41   18   substantive factors.  
42

## 43 44   19 45 46 47   20 48 49   21   **Keywords**

50  
51   22   psychological health, General Health Questionnaire (GHQ-12), method effects, item wording  
52  
53   23   effects, confirmatory factor analysis  
54

55  
56   24  
57  
58  
59  
60



## Strengths and limitations of this study

### Strengths

- Sampling quality: A random and large representative sample of workers and face-to-face administration by professional interviewers.
- To compare confirmatory models for positively and/or negatively worded items and using two different parameterizations.
- To study demographic correlates of wording effects.

### Limitations

- The different response scale used for the NW items and the PW items in the questionnaire could be a confusion variable.
- The results might not be generalized to other specific populations as, for example, adolescents and elderly retired people.

## 1 2 3 1 **Introduction** 4 2

5  
6 3 Originally developed by Goldberg[1], the General Health Questionnaire (GHQ) has been widely  
7 4 used as a screening instrument for measuring General Psychological Health (GPH) in both  
8  
9 5 community and non-psychiatric clinical settings[2]. The shortest 12-item version (GHQ-12) is the  
10  
11 6 most popular and has been employed on different settings and in several countries, as well as part of  
12  
13 7 multiple major national health, social wellbeing and occupational surveys, achieving results which  
14  
15 8 underline the fact that it is highly reliable and valid[3-11].  
16  
17  
18  
19

20 9 Despite its broad application, the factor structure underlying the responses to the GHQ-12  
21  
22 10 remains a controversial issue. In this sense, although the GHQ-12 was originally developed as a  
23  
24 11 unidimensional scale, this one-factor latent structure has found little empirical support and some  
25  
26 12 alternative multidimensional models have been proposed as more appropriate. Thus, the one with  
27  
28 13 the most empirical support is the three-factor model proposed by Graetz[5,12-22]. It is important to  
29  
30 14 note that the 6 positively worded (PW) items make up the first factor, whereas the other two factors  
31  
32 15 are made up of the 6 negatively worded (NW) items (see Figure 1, Model 8). On the other hand, the  
33  
34 16 bidimensional model, where the 6 NW and the 6 PW items in the GHQ-12 are grouped into two  
35  
36 17 factors, has also obtained wide support, especially in studies based on exploratory factor  
37  
38 18 analysis[5,10,23-28]. The arguments against these models and in favor of the unidimensional  
39  
40 19 solution are the high correlations between the factors[13] and the low discriminant validity of the  
41  
42 20 factor scores derived from these models[16,29,30].  
43  
44  
45  
46  
47

48 21 As Hankins[31] points out, multifactor models may just be the resulting artifact of the  
49  
50 22 inclusion of PW and NW items in the questionnaire and so, the controversy about the factorial  
51  
52 23 structure of the GHQ-12 might relate to the effect of item wording on subjects' response patterns as  
53  
54 24 part of a more general category called 'method[32,33]. Hankins[31] found that, after modeling the  
55  
56 25 wording effects for the NW items, the unidimensional model fitted better than both the two-factor  
57  
58 26 model (NW vs. PW items) and Graetz's three-factor model. Other studies have called into question  
59  
60

1  
2  
3 1 the substantive meaning of the GHQ-12 multifactor solutions, suggesting that they might just be an  
4  
5 2 artifact due to the wording effects associated with NW items[29,30,34-40]. See Molina et al.[36]  
6  
7  
8 3 for a deeper review about the dimensionality of GHQ-12.  
9

10 4 Some studies about other instruments, however, suggested not only considering the wording  
11  
12 5 effects for the NW items but also for the PW items[41,42]. Regarding GHQ-12, only a recent  
13  
14 6 analytical factor meta-analysis modelled the presence of method effects for negatively and  
15  
16  
17 7 positively worded items concluding that positively keyed items explained incremental variance  
18  
19 8 beyond a general mental health factor[43].  
20

21 9 Another source of variability in the results about the factor structure of the GHQ-12 could  
22  
23  
24 10 come from the statistical control of method biases, that has been mainly achieved through the  
25  
26 11 correlated traits-correlated methods (CTCM) and the correlated traits-correlated uniquenesses  
27  
28 12 (CTCU) confirmatory factor analysis models. Both procedures have been used in GHQ-12, to deal  
29  
30  
31 13 with method effects applying the CTCM model[i.e., 30,44] the CTCU model[i.e., 29,31,39,40], or  
32  
33 14 both CTCM and CTCU[i.e., 34-37].  
34

35 15 To date, we have not found any studies about GHQ-12 that analyze the wording effects  
36  
37 16 associated with either PW items alone, nor with NW and PW items simultaneously, comparing both  
38  
39  
40 17 CTCU and CTCM models. There are several multivariate statistical models for analyzing method  
41  
42 18 effect, and among them the CFA based approaches are the most popular approach[45]. Among the  
43  
44 19 different CFA models stand out the CFA with correlated traits and correlated methods (CFA-  
45  
46  
47 20 CTCM) and the CFA with correlated traits and correlated uniqueness (CTCU). The CTCM specifies  
48  
49 21 that item (indicator) variance can be explained by can be written as a linear combination of trait,  
50  
51 22 method, and error effects[46]. Trait and method effects are treated as latent variables. The CTCM  
52  
53  
54 23 model, when method result uncorrelated (or are specified as independent) translates into the well-  
55  
56 24 known Bifactor model[47,48]. The CTCU model specifies trait factors while method effects are  
57  
58 25 modeled correlating the uniqueness of items (indicators) sharing a common method[49]. Both  
59  
60

1  
2  
3 1 CTCM and CTCU models have strengths and shortcomings and therefore are usually employed  
4  
5 2 simultaneously[50]. So, this work extends the previous work by Molina et al.[36], which compares  
6  
7 3 the fit of the unidimensional model, the multifactor models and the CTCM and CTCU  
8  
9  
10 4 unidimensional models with method effects for only the NW items.

11  
12 5 To clarify this work, Figure 1 (Model 1 to Model 9) shows the 9 CFA models that we  
13  
14 6 consider here in order to test the potential method effects associated with either the PW or the NW  
15  
16  
17 7 or both. Model 1 is a one factor model of general health. This model also works as a baseline model  
18  
19 8 against which to compare other more complex models. Models 2 and 3 are the CTCU and CTCM  
20  
21 9 models that include method effects for the NW items. These were the best fitting models in Molina  
22  
23  
24 10 et al. [36] and are the base-models for this study. Models 4 and 5 are the CTCU and CTCM models  
25  
26 11 including method effects for the PW items. Model 6 is the CTCM model including method factors  
27  
28 12 for both the NW and PW items (a CTCU model with method effects for both PW and NW items  
29  
30  
31 13 was not estimated because it is not identified). Model 7 is a bifactor model with a general trait  
32  
33 14 factor of general health and two method factors associated to NW and PW items. The three factors  
34  
35 15 are independent (uncorrelated). Additionally, and considering the best fitting multidimensional  
36  
37 16 model in Tomás, Gutiérrez and Sancho[51] based on the results by Graetz [12], models 8 and 9  
38  
39  
40 17 were also tested. Model 8 posited three substantive dimensions: social dysfunction, anxiety and  
41  
42 18 depression and loss of confidence. Model 9 included an additional method factor associated to NW  
43  
44 19 items. Models considering a method factor associated to PW items made no sense as all PW items  
45  
46  
47 20 were indicators of social dysfunction.

48  
49 21 As stressed by Marsh et al.[52], it becomes necessary to consider this comprehensive set of  
50  
51 22 competing models to determine the relative importance and substantive nature of the method  
52  
53  
54 23 effects.

55  
56 24 Figure 1

57  
58  
59  
60

1  
2  
3 1  
4  
5 2 Finally, there has been some research carried out on the demographic correlates of method  
6  
7  
8 3 effects, such as sex[53–57], age[55,58] or educational level[41,59]. With respect to the GHQ–12, to  
9  
10 4 date, we have not found any studies that analyze demographic correlates of method effects.

11  
12 5 Building on the previous studies, the first aim of this study was to overcome the limitation  
13  
14 6 pointed out in Molina et al.[36] and examine method effects associated with both positive and  
15  
16  
17 7 negative wording. The second aim was to further understand the meaning of the method factors;  
18  
19 8 therefore, we evaluated the relationships between the method factors and three covariates (i.e., the  
20  
21 9 sex, age, and educational level) in the framework of a structural equation model (SEM).  
22  
23  
24 10

## 26 11 **Method**

### 28 12 *Participants*

30  
31 13 The data used in this study came from the Second Catalonian Survey of Working Conditions[60]  
32  
33 14 and were based on a representative random sample of all employees living in Catalonia (Spain).  
34  
35 15 Data were collected between September and November 2010 by professional interviewers in private  
36  
37 16 households. The sample comprised a total of 3,050 participants who responded to the GHQ–12  
38  
39  
40 17 included in the survey. Main sociodemographic characteristics of the sample are shown in Table 1.  
41

42 18 Table 1. *Main sociodemographic characteristics.*

|                                          | M (SD)        | n (%)       | Range |
|------------------------------------------|---------------|-------------|-------|
| <i>Gender</i>                            |               |             |       |
| Women                                    |               | 1361 (44.6) |       |
| <i>Age</i>                               | 40.46 (11.19) |             | 17-82 |
| <i>Education</i>                         |               |             |       |
| Incomplete primary studies               |               | 90 (3.0)    |       |
| Primary studies                          |               | 541 (17.9)  |       |
| Secondary studies. 1 <sup>st</sup> stage |               | 637 (21.0)  |       |
| Associate degree                         |               | 763 (25.2)  |       |

|                      |            |
|----------------------|------------|
| High School          | 598 (19.8) |
| Graduate studies     | 359 (11.9) |
| Postgraduate studies | 39 (1.3)   |

Note. *M* = Mean; *SD* = Standard Deviation

## Public Involvement

Respondents were not involved in any stage of the design of the study and were only requested to respond the survey. In the selected households, interviewers identified themselves personally and informed this was an official survey about the working conditions of employed Catalanian people commissioned by the Catalanian Government Work Department.

Results were published on the Catalanian Government Work Department website[60] and are available at

[https://treball.gencat.cat/ca/ambits/seguretat\\_i\\_salut\\_laboral/publicacions/estadistiques\\_estudis/ci/ii/ecct/treballadors/](https://treball.gencat.cat/ca/ambits/seguretat_i_salut_laboral/publicacions/estadistiques_estudis/ci/ii/ecct/treballadors/)

## Measures

The GHQ–12 is a self-report scale that contains 6 PW items (e.g. “Have you been able to face up to problems?”) and 6 NW items (e.g. “Have you been losing confidence in yourself?”). The GHQ–12 was validated in Spain by Lobo and Muñoz[61]. Table 2 shows the statements of these items in the same order as they were presented in the survey. It must be noted that the GHQ–12 has a different response scale for the PW items (i.e.: *more than usual*; *same as usual*; *less than usual*; and *much less than usual*) and the NW items (i.e.: *not at all*; *no more than usual*; *rather more than usual*; and *much more than usual*). Accordingly, the 4-point scoring scheme was applied in our study so total scores in the GHQ–12 ranged from 0 to a maximum of 36, with higher scores indicating lower levels of GPH.

Table 2. Descriptive statistics, standardized factor loadings from Model 7 and correlations between the Model 7 factors and the covariates

| Item | <i>M</i> | <i>SD</i> | Model 7    |           |           |
|------|----------|-----------|------------|-----------|-----------|
|      |          |           | <i>GPH</i> | <i>PW</i> | <i>NW</i> |

|                                                     |      |      |      |      |      |
|-----------------------------------------------------|------|------|------|------|------|
| Item 1. Able to concentrate                         | 1.03 | 0.37 | .42* | .49* |      |
| Item 2. Lost sleep over worry                       | 0.57 | 0.75 | .78* |      | .07  |
| Item 3. Playing a useful part in things             | 0.96 | 0.31 | .09* | .59* |      |
| Item 4. Capable of making decisions                 | 0.96 | 0.30 | .14* | .70* |      |
| Item 5. Constantly under strain                     | 0.71 | 0.79 | .83* |      | .03  |
| Item 6. Could not overcome difficulties             | 0.44 | 0.66 | .76* |      | .25* |
| Item 7. Enjoy day-to-day activities                 | 1.01 | 0.40 | .53* | .55* |      |
| Item 8. Face up to problems                         | 0.99 | 0.32 | .39* | .60* |      |
| Item 9. Feeling unhappy and depressed               | 0.37 | 0.66 | .78* |      | .38* |
| Item 10. Losing confidence in yourself              | 0.19 | 0.48 | .53* |      | .70* |
| Item 11. Thinking of yourself as a worthless person | 0.12 | 0.40 | .48* |      | .72* |
| Item 12. Feeling reasonably happy                   | 0.99 | 0.38 | .44* | .72* |      |

---

Relations between the Model 7 factors and the socio-demographic variables

---

|                   |  |  |      |       |      |
|-------------------|--|--|------|-------|------|
| Sex               |  |  | .13* | -.08* | -.02 |
| Age               |  |  | .11* | .08*  | .01  |
| Educational level |  |  | .00  | -.02  | -.06 |

---

1 *Note.* *M* = Mean; *SD* = Standard Deviation; *GPH* = General Health Psychology factor; *PW* = Positive Wording factor;

2 *NW* = Negative Wording factor. \**p* < .05

1  
2  
3 1 For the purposes of exploring the correlates of method effects (i.e., item wording effects),  
4  
5 2 we used the following three covariates: (a) sex; (b) age; and (c) educational level, which was  
6  
7  
8 3 measured as a self-reported question with 7 response graduated categories ranging from *incomplete*  
9  
10 4 *primary studies* to *postgraduate studies*. The educational level was scored as the highest level of  
11  
12 5 education reached.  
13  
14  
15 6

### 17 7 *Statistical Analysis*

18  
19 8 A set of competing confirmatory factor models were estimated using MPlus 8.3[62]. Figure 1  
20  
21 9 shows the specification of all these CFA models. The goodness-of-fit indices computed were: the  
22  
23  
24 10 chi-square statistic; the Comparative Fit Index (CFI); the Root Mean Square Error of  
25  
26 11 Approximation (RMSEA) with its 90% confidence interval; and the Standardized Root Mean  
27  
28 12 Square Residual (SRMR). Values greater than 0.95 for CFI and TLI, and lower than 0.06 and 0.08  
29  
30  
31 13 for RMSEA and SRMR, respectively, are considered to indicate good model fit.  
32

33 14 As concerns the estimation of CFA models, most studies into the GHQ-12 factor structure  
34  
35 15 have used maximum likelihood[16,31,35,40,44]. This estimation method relies on several  
36  
37 16 assumptions which should be met to be confident about the results obtained. This is the case of the  
38  
39  
40 17 assumption of multivariate normality which implies, first, that the variables are continuous in nature  
41  
42 18 and, second, that the joint distribution of the variables is normal. The first condition is unlikely to  
43  
44  
45 19 be met with the GHQ-12 Likert-type response data; nor is the second if the variables depart  
46  
47 20 markedly from normality as is the case for the responses to the NW items which were heavily  
48  
49 21 positively skewed (see Figure 2). An alternative when these conditions are not met is to use the  
50  
51 22 weighted least squares (WLS) estimator[63], which has already been used in some studies about the  
52  
53  
54 23 GHQ-12 factor structure[13,18,20,29] and it will be the estimation method used here. Thus, the  
55  
56 24 various CFA models were estimated using Diagonally WLS.  
57

58 25 Finally, correlates of the GHQ-12 factors were evaluated using SEM through the inclusion  
59  
60



1  
2  
3 1 in the finally selected model of the 3 covariates considered in this study: sex was treated as  
4  
5 2 categorical, whereas age and educational level were treated as continuous variables.  
6  
7

8 3  
9 4  
10 5  
11 6  
12 6 **Results**

13  
14 7 The goodness-of-fit statistics and indices obtained for the 9 models compared here are  
15  
16 8 shown in Table 3.

17  
18  
19 9 Table 3. *Fit indexes for the alternative models of the 12-item General Health Questionnaire*

| <i>Models</i>  | <i>df</i> | <i>Chi-</i> | <i>CFI</i> | <i>RMSEA [90% CI]</i> | <i>SRMR</i> |
|----------------|-----------|-------------|------------|-----------------------|-------------|
| <i>Model 1</i> | 54        | 5378.68     | .77        | .180 [.176, .184]     | .119        |
| <i>Model 2</i> | 39        | 928.099     | .96        | .086 [.082, .091]     | .049        |
| <i>Model 3</i> | 48        | 1345.38     | .95        | .094 [.090, .059]     | .061        |
| <i>Model 4</i> | 39        | 934.690     | .96        | .087 [.083, .092]     | .052        |
| <i>Model 5</i> | 48        | 1275.28     | .95        | .092 [.087, .096]     | .058        |
| <i>Model 6</i> | 41        | 497.520     | .98        | .060 [.056, .065]     | .030        |
| <i>Model 7</i> | 42        | 507.741     | .98        | .060 [.056, .065]     | .030        |
| <i>Model 8</i> | 51        | 1142.88     | .95        | .084 [.080, .088]     | .054        |
| <i>Model 9</i> | 45        | 960.388     | .96        | .082 [.078, .086]     | .049        |

20  
21  
22  
23  
24  
25  
26  
27  
28  
29  
30  
31  
32  
33  
34  
35  
36  
37  
38 10 *Notes:* Models are specified in Figure 1; CFI = Comparative Fit Index; RMSEA = Root Mean Square Error of  
39  
40 11 Approximation; CI = Confidence Interval; SRMR = Standardized Root Mean Square Residual.  
41  
42 12

43  
44 13 Model 1, with a single factor of general health, and model 8, with three substantive factors,  
45  
46 14 had worse fit than the models that include wording effects. That is, a careful look at fit indexes  
47  
48 15 makes clear that the inclusion of method effects always improves model fit. Indeed, both NW and  
49  
50 16 PW method effects are needed to get the best fitting models. These best fitting models were models  
51  
52 17 6 and 7. Their fit was practically indistinguishable and, given that they only differ in that model 7 is  
53  
54 18 more parsimonious because constrains method factors correlation to zero, it will be retained as the  
55  
56 19 best representation of the observed data.  
57  
58  
59  
60

1  
2  
3  
4  
5  
6  
7  
8  
9  
10  
11  
12  
13  
14  
15  
16  
17  
18  
19  
20  
21  
22  
23  
24  
25  
26  
27  
28  
29  
30  
31  
32  
33  
34  
35  
36  
37  
38  
39  
40  
41  
42  
43  
44  
45  
46  
47  
48  
49  
50  
51  
52  
53  
54  
55  
56  
57  
58  
59  
60

1 An in-depth inspection of the parameter estimates in Model 7 (see Table 2) showed that all  
2 factor loadings were statistically significant for the three factors, except for items 2 and 5 in the  
3 method factor comprising the NW items.

4 Finally, a statistical analysis of the relationships between the latent factors in Model 7 and  
5 the 3 covariates considered in this study (i.e. sex, age and educational level) was performed through  
6 a MIMIC SEM model in which the effects between the 3 latent factors in Model 7 and the 3  
7 covariates were freely estimated, the focus being on the relationships between the method factors  
8 and the covariates. The model fit was excellent (RMSEA = .040; RMSEA 90% IC = [.037, .049];  
9 CFI = .99; SRMR = .029). As can be seen in Table 2, the relations of age with the method factors  
10 were near to 0 and statistically non-significant for NW items, and positive and significant although  
11 small with PW items (.08). Sex was significantly related with the method factor associated with PW  
12 items (-.08), whereas the educational level was not significantly related to method factors. Thus,  
13 men and women differ in the way they answer PW items, meaning that men are slightly more likely  
14 than women to endorse PW items, and method effects associated to PW items also increased by age.

## 16 Discussion

17 This study focused on the examination of the latent structure underlying the responses to the GHQ-  
18 12, considering the role of method effects associated with both, positive and negative items  
19 wording, and using two alternative parameterizations of the CFA measurement models. What  
20 should first be noted is that the studies that have included method effects in the measurement model  
21 of the GHQ-12 have been more the exception than the rule in previous research into the factor  
22 structure of this questionnaire.

23 According to the results of the present study, we conclude that the GHQ-12 factor structure  
24 is best characterized by introducing latent method factors that capture both the method effects  
25 associated with NW and PW items (Model 7). These results support the conclusion from previous

1  
2  
3 1 research that the good fit obtained by multidimensional models (mainly the two-factor model and  
4  
5 2 the three-factor Graetz's model,) could simply be explained by the artificial grouping of PW and  
6  
7  
8 3 NW items.  
9

10 4 The second aim of this study was to examine the relationships between the method factors  
11  
12 5 associated with both NW and PW items and three demographic variables, namely, the sex, age and  
13  
14 6 educational level of the respondents. Regarding the sex, we found a statistically significant, but  
15  
16 7 weak, relationship between PW and sex, so that men were more likely than women to endorse PW  
17  
18 8 items. These results are in line with previous works that, in the context of RSES, have found sex  
19  
20 9 differences in wording effects[56,57]. As for the explanatory role of age on method effects, we  
21  
22 10 found that the relationship between age and the negative wording effect was not statistically  
23  
24 11 significant, which supports previous research using other questionnaires (e.g., self-esteem  
25  
26 12 scales,[50]; Hospital Anxiety & Depression Scale,[64]). Moreover, our results give support to  
27  
28 13 previous studies which had stated that, in older adults, the strongest method effects would be  
29  
30 14 associated with PW items, rather than NW items[55,58].  
31  
32  
33  
34

35 15 As to the educational level, we found that there was not a significant correlation of this  
36  
37 16 variable on the two method factors. This result supports and extends the evidence obtained in  
38  
39 17 Tomás et al.[50], that found that the educational level of the respondents had no effect on the  
40  
41 18 negative method factor using self-esteem questionnaires. This results contradicts previous research  
42  
43 19 on the relationship of the negative wording factor and the educational level/verbal ability with  
44  
45 20 different questionnaires and samples[41,64–69].  
46  
47  
48

49 21 Taken together, the results on the individual differences related to the demographic variables  
50  
51 22 considered in this study cannot only help to understand the presence of wording method effects but  
52  
53 23 also to identify respondents who are prone to answering PW and NW items differently. In this  
54  
55 24 sense, the relationship that appears as more evident is for the age and sex variables.  
56  
57

58 25 Another practical consequence of our study concerns the relationship between the intended  
59  
60

1  
2  
3  
4  
5  
6  
7  
8  
9  
10  
11  
12  
13  
14  
15  
16  
17  
18  
19  
20  
21  
22  
23  
24  
25  
26  
27  
28  
29  
30  
31  
32  
33  
34  
35  
36  
37  
38  
39  
40  
41  
42  
43  
44  
45  
46  
47  
48  
49  
50  
51  
52  
53  
54  
55  
56  
57  
58  
59  
60

1 measure of the GHQ–12 (i.e., the GPH factor) and other constructs of interest. Several studies have  
2 shown that method effects can inflate, deflate or have no effect at all on estimates of the relationship  
3 between two constructs (see Podsakoff[70], for a further review of the effects that method biases  
4 have on individual measures and on the covariation between different constructs). Thus, it is  
5 desirable that both the constructs of interest as well as the effects of method factors, like positive  
6 and negative wording, are considered in SEM models as a means of controlling these systematic  
7 sources of bias and, thus, avoiding the drawing of inaccurate conclusions about the relationships  
8 between the substantive factors.

9 Previous research on the GHQ-12 (e.g.[31,36]) has outlined the asymmetry in the  
10 participants' responses as a function of the wording of the items, as well as the different responses  
11 scales for the positive and negative items. This asymmetry in the participants' responses as a  
12 function of the wording of the items is consistent with results from previous research into wording  
13 effects for contrastive survey questions[71]. The extent to which the presence of method effects is  
14 linked to the asymmetric pattern of responses and/or to the different response scales for the PW and  
15 NW items in the GHQ–12 should be examined in future research.

16 Comparing the current work with previous studies into the factorial structure of the GHQ–  
17 12, to our knowledge, this is the first study that, on the one hand, tests a comprehensive set of  
18 models including method effects associated with both PW and NW items and also explores some  
19 demographic correlates of these method effects. Another strength of this work was the fact that it  
20 used a large representative sample of workers, but the results might not be generalized to other  
21 specific populations, for example, adolescents and elderly retired people.

1  
2  
3 **1 Funding**  
4 2

5 3 This work was supported by the Grant PGC2018-100675-B-I00, Spanish Ministry of  
6 4 Science, Innovation and Universities (Spain). The funders had no role in the study design, data  
7 5 collection and analysis, decision to publish, or preparation of the manuscript.  
8 6  
9

10 6  
11 **7 Competing interests**

12 8 No conflict of interest has been declared by the authors.  
13 9

14 9  
15 **10 Contributors**

16 11 All authors meet the criteria recommended by the International Committee of Medical Journal  
17 12 Editors, ICMJE. All authors made substantial contributions to conception and design, acquisition of  
18 13 data, or analysis and interpretation of data. MFR and GM: drafted the article. JV and JML: critically  
19 14 revised the draft for important intellectual content. JMT worked in the statistical analysis and  
20 15 interpretation of data. All authors agreed on the final version.  
21  
22  
23  
24  
25  
26  
27  
28  
29  
30  
31  
32  
33  
34  
35  
36  
37  
38  
39  
40  
41  
42  
43  
44  
45  
46  
47  
48  
49  
50  
51  
52  
53  
54  
55  
56  
57  
58  
59  
60

## References

- 1 Goldberg DP. *The detection of psychiatric illness by questionnaire*. London: : Oxford University Press 1972.
- 2 Goldberg DP, Williams P. *A user's guide to the General Health Questionnaire*. Windsor, United Kingdom: : NFER-Nelson 1988.
- 3 Bhui K, Bhugra D, Goldberg D. Cross-cultural validity of the Amritsar Depression Inventory and the General Health Questionnaire amongst English and Punjabi primary care attenders. *Soc Psychiatry Psychiatr Epidemiol* 2000;**35**:248–54.
- 4 Daradkeh TK, Ghubash R, El-Rufaie O. Reliability, validity, and factor structure of the Arabic version of the 12-item General Health Questionnaire. *Psychol Rep* 2001;**89**:85–94.
- 5 Gelaye B, Tadesse MG, Lohsoonthorn V, *et al*. Psychometric properties and factor structure of the General Health Questionnaire as a screening tool for anxiety and depressive symptoms in a multi-national study of young adults. *J Affect Disord* 2015;**187**:197–202. doi:10.1016/J.JAD.2015.08.045
- 6 Goldberg DP, Gater R, Sartorius N, *et al*. The validity of two versions of the GHQ in the WHO study of mental illness in general health care. *Psychol Med* 1997;**27**:191–7.
- 7 Lundin A, Hallgren M, Theobald H, *et al*. Validity of the 12-item version of the General Health Questionnaire in detecting depression in the general population. *Public Health* 2016;**136**:66–74. doi:10.1016/J.PUHE.2016.03.005
- 8 Rocha K, Pérez K, Rodríguez-Sanz M, *et al*. Propiedades psicométricas y valores normativos del General Health Questionnaire (GHQ-12) en población general española. *Int J Clin Heal Psychol* 2011;**11**:125–39.
- 9 Sanchez-Lopez MP, Dresch V. The 12-item General Health Questionnaire (GHQ-12): Reliability, external validity and factor structure in the Spanish population. *Psicothema* 2008;**20**:839–43.

- 1  
2  
3 1 10 Schmitz N, Kruse J, Tress W. Psychometric properties of the General Health Questionnaire  
4  
5 2 (GHQ-12) in a German primary care sample. *Acta Psychiatr Scand* 1999;**100**:462–8.  
6  
7 3 11 Tait RJ, French DJ, Hulse GK. Validity and psychometric properties of the General Health  
8  
9 4 Questionnaire-12 in young Australian adolescents. *Aust N Z J Psychiatry* 2003;**37**:374–81.  
10  
11 5 12 Graetz B. Multidimensional properties of the General Health Questionnaire. *Soc Psychiatry*  
12  
13 *Psychiatr Epidemiol* 1991;**26**:132–8.  
14  
15 6  
16  
17 7 13 Campbell A, Knowles S. A confirmatory factor analysis of the GHQ12 using a large  
18  
19 8 Australian sample. In: *European Journal of Psychological Assessment*. 2007. 2–8.  
20  
21 9 14 Cheung YB. A confirmatory factor analysis of the 12-item General Health Questionnaire  
22  
23 10 among older people. *Int J Geriatr Psychiatry* 2002;**17**:739–44.  
24  
25  
26 11 15 French DJ, Tait RJ. Measurement invariance in the General Health Questionnaire-12 in  
27  
28 12 young Australian adolescents. *Eur Child Adolesc Psychiatry* 2004;**13**:1–7.  
29  
30  
31 13 16 Gao F, Luo N, Thumboo J, *et al*. Does the 12-item General Health Questionnaire contain  
32  
33 14 multiple factors and do we need them? *Health Qual Life Outcomes* 2004;**2**:1–7.  
34  
35 15 doi:10.1186/1477-7525-2-63  
36  
37 16 17 Mäkikangas A, Feldt T, Kinnunen U, *et al*. The factor structure and factorial invariance of  
38  
39 17 the 12-item General Health Questionnaire (GHQ-12) across time: Evidence from two  
40  
41 18 community-based samples. *Psychol Assess* 2006;**18**:444–51.  
42  
43  
44 19 18 Padrón A, Galán I, Durbán M, *et al*. Confirmatory factor analysis of the General Health  
45  
46 20 Questionnaire (GHQ-12) in Spanish adolescents. *Qual Life Res* 2012;**21**:1291–8.  
47  
48  
49 21 19 Penninkilampi-Kerola V, Miettunen J, Ebeling H. Health and disability: A comparative  
50  
51 22 assessment of the factor structures and psychometric properties of the GHQ-12 and the  
52  
53 23 GHQ-20 based on data from a Finnish population-based sample. *Scand J Psychol*  
54  
55 24 2006;**47**:431–40.  
56  
57  
58 25 20 Shevlin M, Adamson G. Alternative factor models and factorial invariance of the GHQ-12: A  
59  
60

1  
2  
3  
4  
5  
6  
7  
8  
9  
10  
11  
12  
13  
14  
15  
16  
17  
18  
19  
20  
21  
22  
23  
24  
25  
26  
27  
28  
29  
30  
31  
32  
33  
34  
35  
36  
37  
38  
39  
40  
41  
42  
43  
44  
45  
46  
47  
48  
49  
50  
51  
52  
53  
54  
55  
56  
57  
58  
59  
60

- 1 large sample analysis using confirmatory factor analysis. *Psychol Assess* 2005;**17**:231–6.
- 2 21 Martin CR, Newell RJ. The factor structure of the 12-item General Health Questionnaire in
- 3 individuals with facial disfigurement. *J Psychosom Res* 2005;**59**:193–9.
- 4 doi:10.1016/j.jpsychores.2005.02.020
- 5 22 Tomás JM, Meléndez JC, Oliver A, *et al*. Efectos de método en las escalas de Ryff: Un
- 6 estudio en población de personas mayores. *Psicológica* 2010;**31**:383–400.
- 7 23 Andrich D, Van Schoubroeck L. The General Health Questionnaire: a psychometric analysis
- 8 using latent trait theory. *Psychol Med* 1989;**19**:469–85.
- 9 24 Gao W, Stark D, Bennett MI, *et al*. Using the 12-item General Health Questionnaire to
- 10 screen psychological distress from survivorship to end-of-life care: Dimensionality and item
- 11 quality. *Psychooncology* 2012;**21**:954–61.
- 12 25 Glozah FN, Pevalin DJ. Factor structure and psychometric properties of the General Health
- 13 Questionnaire (GHQ-12) among Ghanaian adolescents. *J Child Adolesc Ment Heal*
- 14 2015;**27**:53–7. doi:10.2989/17280583.2015.1007867
- 15 26 Kilic C, Rezaki M, Rezaki B, *et al*. General Health Questionnaire (GHQ-12 & GHQ-28):
- 16 Psychometric properties and factor structure of the scales in a Turkish primary care sample.
- 17 *Soc Psychiatry Psychiatr Epidemiol* 1997;**32**:327.
- 18 27 Picardi A, Abeni D, Pasquini P. Assessing psychological distress in patients with skin
- 19 diseases: Reliability, validity and factor structure of the GHQ-12. *Eur Acad Dermatology*
- 20 *Venereol* 2001;**15**:410.
- 21 28 Werneke U, Goldberg DP, Yalcin I, *et al*. The stability of the factor structure of the General
- 22 Health Questionnaire. *Psychol Med* 2000;**30**:823.
- 23 29 Aguado J, Campbell A, Ascaso C, *et al*. Examining the factor structure and discriminant
- 24 validity of the 12-item General Health Questionnaire (GHQ-12) among Spanish post-partum
- 25 women. *Assessment* 2012;**19**:517–25.



- 1  
2  
3 1 30 Ye S. Factor structure of the General Health Questionnaire (GHQ-12): The role of wording  
4 effects. *Pers Individ Dif* 2009;**46**:197–201.  
5  
6 2  
7  
8 3 31 Hankins M. The factor structure of the twelve item General Health Questionnaire (GHQ-12):  
9 the result of negative phrasing? *Clin Pract Epidemiol Ment Heal* 2008;**4**:10.  
10  
11 4  
12 5 32 Harvey RJ, Billings RS, Nilan KJ. Confirmatory factor analysis of the Job Diagnostic  
13 Survey: Good news and bad news. *J Appl Psychol* 1985;**70**:461–8.  
14  
15 6  
16  
17 7 33 Smith N, Stults DM. Factors defined by negatively keyed items: The results of careless  
18 respondents? *Appl Psychol Meas* 1985;**9**:367–73.  
19  
20 8  
21 9 34 Abubakar A, Fischer R. The factor structure of the 12-item General Health Questionnaire in a  
22 literate Kenyan population. *Stress Heal J Int Soc Investig Stress* 2012;**28**:248–54.  
23  
24 10  
25  
26 11 35 Fernandes HM, Vasconcelos-Raposo J. Factorial validity and invariance of the GHQ-12  
27 among clinical and nonclinical samples. *Assessment* 2013;**20**:219–29.  
28  
29 12  
30  
31 13 doi:<http://dx.doi.org/10.1177/1073191112465768>  
32  
33 14 36 Molina JG, Rodrigo MF, Losilla J-M, *et al.* Wording effects and the factor structure of the  
34 12-item General Health Questionnaire (GHQ-12). *Psychol Assess* 2014;**26**:1031–1037.  
35  
36 15  
37 16 doi:10.1037/a0036472  
38  
39  
40 17 37 Motamed N, Edalatian Zakeri S, Rabiee B, *et al.* The Factor Structure of the Twelve Items  
41 General Health Questionnaire (GHQ-12): a Population Based Study. *Appl Res Qual Life*  
42 2018;**13**:303–16. doi:10.1007/s11482-017-9522-y  
43  
44 19  
45  
46 20 38 Rey JJ, Abad FJ, Barrada JR, *et al.* The impact of ambiguous response categories on the  
47 factor structure of the GHQ–12. *Psychol Assess* 2014;**26**:1021–30. doi:10.1037/a0036468  
48  
49 21  
50  
51 22 39 Romppel M, Braehler E, Roth M, *et al.* What is the General Health Questionnaire-12  
52 assessing? *Compr Psychiatry* 2013;**54**:406–13. doi:10.1016/j.comppsy.2012.10.010  
53  
54 23  
55  
56 24 40 Smith AB, Oluboyede Y, West R, *et al.* The factor structure of the GHQ-12: The interaction  
57 between item phrasing, variance and levels of distress. *Qual Life Res An Int J Qual Life Asp*  
58  
59 25  
60

- 1  
2  
3 1 *Treat Care Rehabil* 2013;**22**:145–52.  
4  
5 2 41 Marsh HW. Negative item bias in ratings scales for preadolescent children: A cognitive-  
6  
7 developmental phenomenon. *Dev Psychol* 1986;**22**:37–49.  
8 3  
9  
10 4 42 Tomás JM, Oliver A. Rosenberg’s Self-Esteem Scale: Two factors or method effects. *Struct*  
11  
12 5  
13 *Equ Model A Multidiscip J* 1999;**6**:84–98.  
14  
15 6 43 Gnambs T, Staufenbiel T. The structure of the General Health Questionnaire (GHQ-12): two  
16  
17 7 meta-analytic factor analyses. *Health Psychol Rev* 2018;**12**:179–94.  
18  
19 8 doi:10.1080/17437199.2018.1426484  
20  
21 9 44 Wang L, Lin W. Wording effects and the dimensionality of the General Health Questionnaire  
22  
23 (GHQ-12). *Pers Individ Dif* 2011;**50**:1056–61.  
24 10  
25  
26 11 45 Wothke W. Models for multitrait-multimethod matrix analysis. In: Marcoulides GA,  
27  
28 12 Schumacker RE, eds. *Advanced Structural Equation Modeling: Issues and Techniques*.  
29  
30 Mahwah, NJ: : Lawrence Erlbaum Associates 1996.  
31 13  
32  
33 14 46 Jöreskog KG. Analyzing psychological data by structural analysis of covariance matrices. In:  
34  
35 15 Atkinson RC, Krantz DH, Luce RD, *et al.*, eds. *Contemporary developments in mathematical*  
36  
37 16 *psychology. Vol. 2*. San Francisco: : Freeman 1974. 1–56.  
38  
39  
40 17 47 Markon KE. Bifactor and Hierarchical Models: Specification, Inference, and Interpretation.  
41  
42 18 *Annu Rev Clin Psychol* 2019;**15**:51–69. doi:10.1146/annurev-clinpsy-050718-095522  
43  
44 19 48 Reise SP. The Rediscovery of Bifactor Measurement Models. *Multivariate Behav Res*  
45  
46 20 2012;**47**:667–96. doi:10.1080/00273171.2012.715555  
47  
48  
49 21 49 Marsh HW, Bailey M. Confirmatory Factor Analyses of Multitrait-Multimethod Data: A  
50  
51 22 Comparison of Alternative Models. *Appl Psychol Meas* 1991;**15**:47–70.  
52  
53 23 doi:10.1177/014662169101500106  
54  
55  
56 24 50 Tomás JM, Oliver A, Galiana L, *et al.* Explaining method effects associated with negatively  
57  
58 25 worded items in trait and state global and domain-specific self-esteem scales. *Struct Equ*  
59  
60

- 1  
2  
3 1 *Model A Multidiscip J* 2013;**20**:299–313.  
4  
5 2 51 Tomás JM, Gutiérrez M, Sancho P. Factorial Validity of the General Health Questionnaire 12  
6  
7 in an Angolan Sample. *Eur J Psychol Assess* 2017;**33**:116–22. doi:10.1027/1015-  
8 3  
9 5759/a000278  
10 4  
11  
12 5 52 Marsh HW, Scalas LF, Nagengast B. Longitudinal tests of competing factor structures for the  
13  
14 Rosenberg Self-Esteem Scale: Traits, ephemeral artifacts, and stable response styles. *Psychol*  
15 6  
16 *Assess* 2010;**22**:366–81.  
17 7  
18  
19 8 53 DiStefano C, Motl RW. Self-Esteem and method effects associated with negatively worded  
20  
21 items: Investigating factorial invariance by sex. *Struct Equ Model A Multidiscip J*  
22 9  
23 2009;**16**:134–46.  
24 10  
25  
26 11 54 Gana K, Saada Y, Bailly N, *et al.* Longitudinal factorial invariance of the Rosenberg Self-  
27  
28 Esteem Scale: Determining the nature of method effects due to item wording. *J Res Pers*  
29 12  
30 2013;**47**:406–16.  
31 13  
32  
33 14 55 Lindwall M, Barkoukis V, Grano C, *et al.* Method effects: The problem with negatively  
34  
35 versus positively keyed items. *J Pers Assess* 2012;**94**:196–204.  
36 15  
37  
38 16 56 Michaelides MP, Zenger M, Koutsogiorgi C, *et al.* Personality correlates and gender  
39  
40 invariance of wording effects in the German version of the Rosenberg Self-Esteem Scale.  
41  
42 *Pers Individ Dif* 2016;**97**:13–8. doi:10.1016/J.PAID.2016.03.011  
43 18  
44  
45 19 57 Urbán R, Szigeti R, Kökönyei G, *et al.* Global self-esteem and method effects: Competing  
46  
47 factor structures, longitudinal invariance, and response styles in adolescents. *Behav Res*  
48  
49 *Methods* 2014;**46**:488–98. doi:10.3758/s13428-013-0391-5  
50 21  
51  
52 22 58 Mullen SP, Gothe NP, McAuley E. Evaluation of the factor structure of the Rosenberg Self-  
53  
54 Esteem Scale in older adults. *Pers Individ Dif* 2013;**54**:153–7.  
55 23  
56 24 59 Marsh HW. Positive and negative global self-esteem: A substantively meaningful distinction  
57  
58 or artifactors? *J Pers Soc Psychol* 1996;**70**:810–9. doi:10.1037/0022-3514.70.4.810  
59  
60

- 1  
2  
3 1 60 Catalonian Labor Relations and Quality of Work Department. *Segunda Encuesta Catalana*  
4  
5 2 *de Condiciones de Trabajo [Second Catalonian Survey of Working Conditions]*. Barcelona: :  
6  
7 Author 2012.  
8 3  
9  
10 4 61 Lobo A, Muñoz PE. Versiones en lengua española validadas. In: Goldberg D, Williams P,  
11  
12 5 eds. *Cuestionario de Salud General GHQ (General Health Questionnaire)*. Guia para el  
13  
14 6 usuario de las distintas versiones [Guide for the use of the different validated versions in  
15  
16 7 Spanish language]. Barcelona, Spain: : Editorial Masson 1996.  
17  
18  
19 8 62 Muthén LK, Muthén BO. *Mplus User's Guide*. 6th ed. Los Angeles, CA: : Muthén &  
20  
21 9 Muthén 2011.  
22  
23  
24 10 63 Browne MW. Asymptotic distribution free methods in the analysis of covariance structures.  
25  
26 11 *Br J Math Stat Psychol* 1984;**37**:62–83.  
27  
28  
29 12 64 Wouters E, Booyens F le R, Ponnet K, *et al*. Wording Effects and the Factor Structure of the  
30  
31 13 Hospital Anxiety & Depression Scale in HIV/AIDS Patients on Antiretroviral  
32  
33 14 Treatment in South Africa. *PLoS One* 2012;**7**:1–7. doi:10.1371/journal.pone.0034881  
34  
35  
36 15 65 Bors DA, Vigneau FO, Lalonde F. Measuring the Need for Cognition: Item polarity,  
37  
38 16 dimensionality, and the relation with ability. *Pers Individ Dif* 2006;**40**:819–28.  
39  
40  
41 17 66 Chen YH, Rendina-Gobioff G, Dedrick RF. Factorial Invariance of a Chinese Self-Esteem  
42  
43 18 Scale for Third and Sixth Grade Students: Evaluating Method Effects Associated with  
44  
45 19 Positively and Negatively Worded Items. *Int J Educ Psychol Assess* 2010;**6**:21–35.  
46  
47  
48 20 67 Corwyn RF. The factor structure of global self-esteem among adolescents and adults. *J Res*  
49  
50 21 *Pers* 2000;**34**:357–79.  
51  
52  
53 22 68 Rammstedt B, Goldberg LR, Borg I. The measurement equivalence of Big-Five factor  
54  
55 23 markers for persons with different levels of education. *J Res Pers* 2010;**44**:53–61.  
56  
57  
58 24 69 Schmitt DP, Allik J. Simultaneous administration of the Rosenberg Self-Esteem Scale in 53  
59  
60 25 nations: Exploring the universal and culture-specific features of global self-esteem. *J Pers*

- 1  
2  
3 1        *Soc Psychol* 2005;**89**:623–42.  
4  
5 2 70     Podsakoff PM, MacKenzie SB, Podsakoff NP. Sources of method bias in social science  
6  
7 3        research and recommendations on how to control it. *Annu Rev Psychol* 2012;**63**:539–69.  
8  
9  
10 4 71     Kamoen N, Holleman B, Mak P, *et al.* Agree or Disagree? Cognitive Processes in Answering  
11  
12 5        Contrastive Survey Questions. *Discourse Process* 2011;**48**:355–85.  
13  
14 6        doi:10.1080/0163853X.2011.578910  
15  
16  
17 7  
18  
19  
20  
21  
22  
23  
24  
25  
26  
27  
28  
29  
30  
31  
32  
33  
34  
35  
36  
37  
38  
39  
40  
41  
42  
43  
44  
45  
46  
47  
48  
49  
50  
51  
52  
53  
54  
55  
56  
57  
58  
59  
60

1  
2  
3  
4  
5  
6  
7  
8  
9  
10  
11  
12  
13  
14  
15  
16  
17  
18  
19  
20  
21  
22  
23  
24  
25  
26  
27  
28  
29  
30  
31  
32  
33  
34  
35  
36  
37  
38  
39  
40  
41  
42  
43  
44  
45  
46  
47  
48  
49  
50  
51  
52  
53  
54  
55  
56  
57  
58  
59  
60

1  
2 →FILE Figure1.pdf

3  
4 *Figure 1.* Competing models tested for the 12–Item General Health Questionnaire. Underlined numbers identify negatively  
5 worded items. GPH: General Psychological Health factor; NW: Method factor associated with negatively worded items;  
6 PW: Method factor associated with positively worded items.

1  
2  
3 1  
4 2  
5 3 →FILE Figure2.pdf  
6  
7 4  
8  
9  
10 5  
11  
12 6  
13  
14 7  
15  
16 8  
17  
18 9  
19  
20 10  
21  
22 11  
23  
24 12  
25  
26 13  
27  
28 14  
29  
30 15  
31  
32 16  
33  
34 17  
35  
36 18  
37  
38 19  
39  
40  
41  
42  
43  
44  
45  
46  
47  
48  
49  
50  
51  
52  
53  
54  
55  
56  
57  
58  
59  
60

Figure 2. Bar charts of the response distributions for the 12-item General Health Questionnaire. Responses were given on a different 4-point response scale for the positively worded items (0 = *better than usual*, 1 = *same as usual*, 2 = *less than usual*, 3 = *much less than usual*) and for the negatively worded items (0 = *not at all*, 1 = *no more than usual*, 2 = *more than usual*, 3 = *much more than usual*).

## Positively worded items

## Negatively worded items

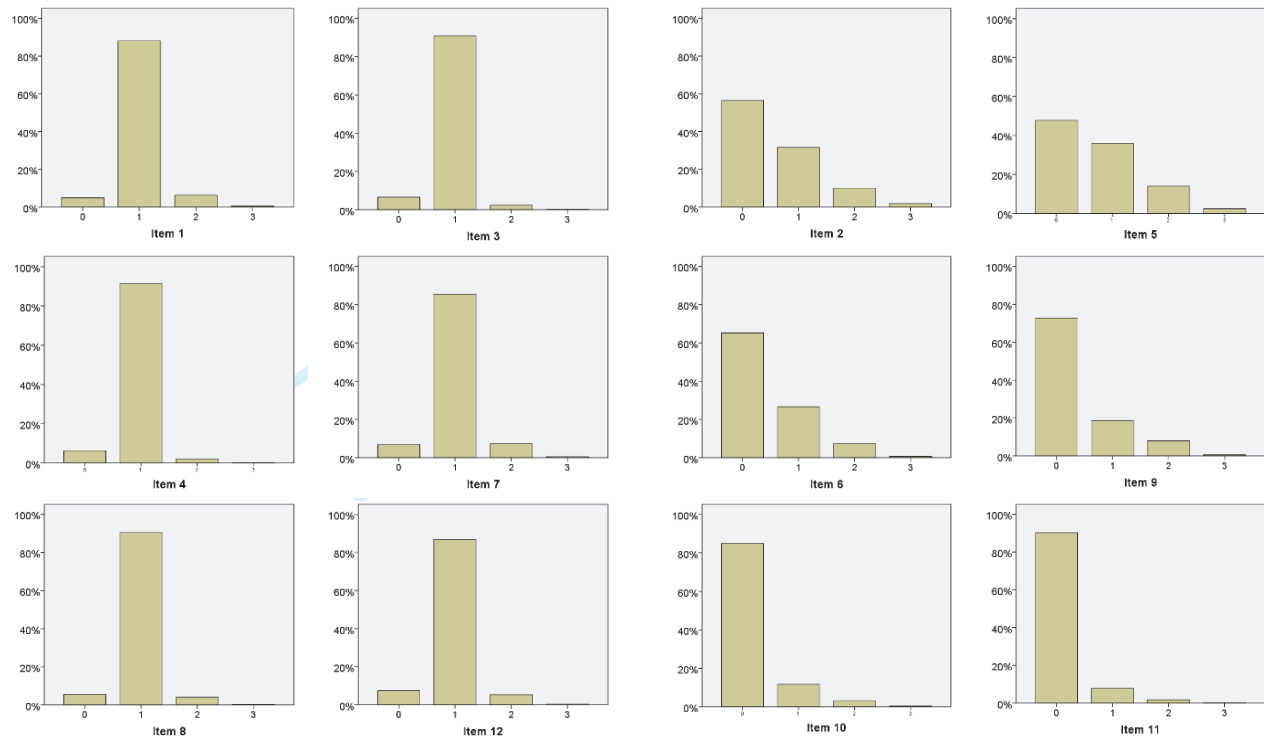

Figure 2. Bar charts of the response distributions for the 12-item General Health Questionnaire. Responses were given on a different 4-point response scale for the positively worded items (0 = better than usual, 1 = same as usual, 2 = less than usual, 3 = much less than usual) and for the negatively worded items (0 = not at all, 1 = no more than usual, 2 = more than usual, 3 = much more than usual).



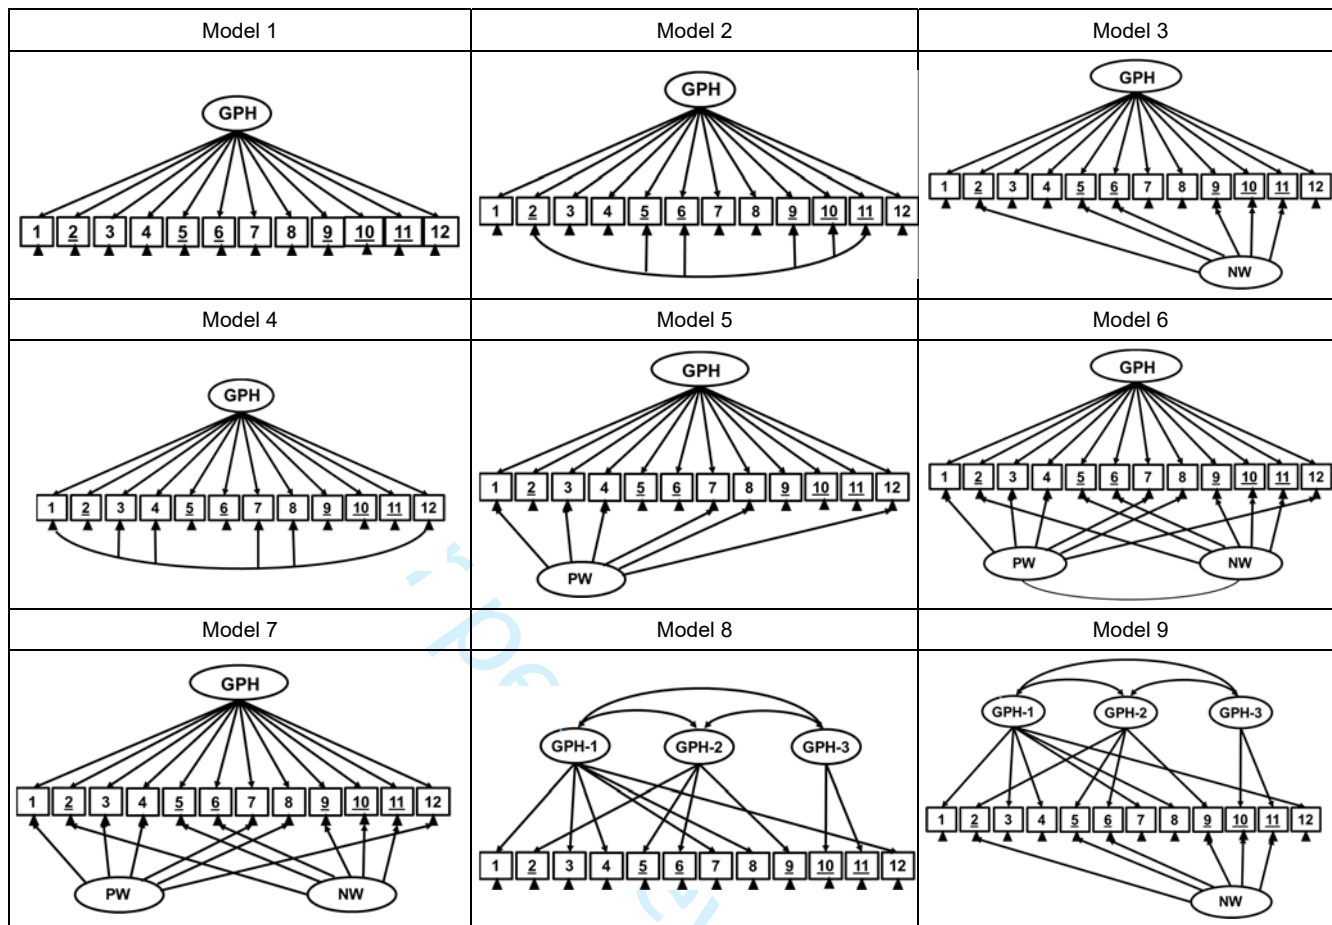

Figure 1. Competing models tested for the 12–Item General Health Questionnaire. Underlined numbers identify negatively worded items. GPH: General Psychological Health factor; GPH–1: Social dysfunction; GPH–2: Anxiety and depression; GPH–3: Loss of confidence; NW: Method factor associated with negatively worded items; PW: Method factor associated with positively worded items.

1  
2  
3  
4  
5  
6  
7  
8  
9  
10  
11  
12  
13  
14  
15  
16  
17  
18  
19  
20  
21  
22  
23  
24  
25  
26  
27  
28  
29  
30  
31  
32  
33  
34  
35  
36  
37  
38  
39  
40  
41  
42  
43  
44  
45  
46  
47  
48  
49  
50  
51  
52  
53  
54  
55  
56  
57  
58  
59  
60STROBE Statement—Checklist of items that should be included in reports of *cross-sectional studies*

|                              | <b>Item No</b> | <b>Recommendation</b>                                                                                                                                                                                                                                 |
|------------------------------|----------------|-------------------------------------------------------------------------------------------------------------------------------------------------------------------------------------------------------------------------------------------------------|
| <b>Title and abstract</b>    | 1              | (a) Indicate the study's design with a commonly used term in the title or the abstract<br><b>P.1 Lines 1-4 (Title)</b>                                                                                                                                |
|                              |                | (b) Provide in the abstract an informative and balanced summary of what was done and what was found<br><b>P.3 Lines 1-18 (Abstract)</b>                                                                                                               |
| <b>Introduction</b>          |                |                                                                                                                                                                                                                                                       |
| Background/rationale         | 2              | Explain the scientific background and rationale for the investigation being reported<br><b>P.5 - P.8 (Introduction)</b>                                                                                                                               |
| Objectives                   | 3              | State specific objectives, including any prespecified hypotheses<br><b>P.8 Lines 5-9 (Introduction)</b>                                                                                                                                               |
| <b>Methods</b>               |                |                                                                                                                                                                                                                                                       |
| Study design                 | 4              | Present key elements of study design early in the paper<br><b>P.8 Lines 13-14 (Method - Participants)</b>                                                                                                                                             |
| Setting                      | 5              | Describe the setting, locations, and relevant dates, including periods of recruitment, exposure, follow-up, and data collection<br><b>P.8 Lines 15-16 (Method - Participants)</b>                                                                     |
| Participants                 | 6              | (a) Give the eligibility criteria, and the sources and methods of selection of participants<br><b>P.8 Lines 14-15 (Method - Participants)</b>                                                                                                         |
| Variables                    | 7              | Clearly define all outcomes, exposures, predictors, potential confounders, and effect modifiers. Give diagnostic criteria, if applicable<br><b>P.9 Lines 2-11 and P.11 Lines 1-5 (Method - Measures)</b>                                              |
| Data sources/<br>measurement | 8*             | For each variable of interest, give sources of data and details of methods of assessment (measurement). Describe comparability of assessment methods if there is more than one group<br><b>P.8 Lines 14-16 and P.9 Lines 2-11 (Method - Measures)</b> |
| Bias                         | 9              | Describe any efforts to address potential sources of bias<br><b>P.8 Line 14 (Method - Participants)</b>                                                                                                                                               |
| Study size                   | 10             | Explain how the study size was arrived at<br><b>P.8 Line 13 (Method - Participants)</b>                                                                                                                                                               |
| Quantitative variables       | 11             | Explain how quantitative variables were handled in the analyses. If applicable, describe which groupings were chosen and why<br><b>P.11 Lines 14-24 and P.12 Line 2 (Method – Statistical Analysis)</b>                                               |
| Statistical methods          | 12             | (a) Describe all statistical methods, including those used to control for confounding<br><b>P.11 Lines 7-24 (Method – Statistical Analysis)</b>                                                                                                       |
|                              |                | (b) Describe any methods used to examine subgroups and interactions<br><b>P.11 Line 25 and P.12 Lines 1-2 (Method – Statistical Analysis)</b>                                                                                                         |
|                              |                | (c) Explain how missing data were addressed<br><b>P.8 Lines 13-14 (Method – Participants). No missing data (personal interview)</b>                                                                                                                   |
|                              |                | (d) If applicable, describe analytical methods taking account of sampling strategy<br><b>P.8 Line 13 (Method – Participants)</b>                                                                                                                      |
|                              |                | (e) Describe any sensitivity analyses<br><b>P.11 Lines 14-24 (Method – Statistical Analysis)</b>                                                                                                                                                      |

**Results**

|                          |     |                                                                                                                                                                                                                                                                                                                                                                                                                                                                                                                                                                 |
|--------------------------|-----|-----------------------------------------------------------------------------------------------------------------------------------------------------------------------------------------------------------------------------------------------------------------------------------------------------------------------------------------------------------------------------------------------------------------------------------------------------------------------------------------------------------------------------------------------------------------|
| Participants             | 13* | (a) Report numbers of individuals at each stage of study—eg numbers potentially eligible, examined for eligibility, confirmed eligible, included in the study, completing follow-up, and analysed<br><a href="#">P.8 Lines 16-18 (Method – Participants)</a><br>(b) Give reasons for non-participation at each stage<br><a href="#">P.8 Line 13 (Method – Participants) Previous study cited (reference number 60)</a><br>(c) Consider use of a flow diagram<br><a href="#">P.8 Line 13 (Method – Participants) Previous study cited (reference number 60)</a>  |
| Descriptive data         | 14* | (a) Give characteristics of study participants (eg demographic, clinical, social) and information on exposures and potential confounders<br><a href="#">P.8 Table 1 (Method – Participants)</a><br>(b) Indicate number of participants with missing data for each variable of interest<br><a href="#">P.8 Lines 13-14 (Method – Participants). No missing data (personal interview)</a>                                                                                                                                                                         |
| Outcome data             | 15* | Report numbers of outcome events or summary measures<br><a href="#">P.9 Table 2 (Method - Measures) and P.12 Figure 2 (Method – Statistical Analysis)</a>                                                                                                                                                                                                                                                                                                                                                                                                       |
| Main results             | 16  | (a) Give unadjusted estimates and, if applicable, confounder-adjusted estimates and their precision (eg, 95% confidence interval). Make clear which confounders were adjusted for and why they were included<br><a href="#">P.9 Table 2 (Method - Measures) and P.12 Table 3 (Results)</a><br>(b) Report category boundaries when continuous variables were categorized<br><a href="#">Not applicable</a><br>(c) If relevant, consider translating estimates of relative risk into absolute risk for a meaningful time period<br><a href="#">Not applicable</a> |
| Other analyses           | 17  | Report other analyses done—eg analyses of subgroups and interactions, and sensitivity analyses<br><a href="#">P.13 Lines 4-14 (Results)</a>                                                                                                                                                                                                                                                                                                                                                                                                                     |
| <b>Discussion</b>        |     |                                                                                                                                                                                                                                                                                                                                                                                                                                                                                                                                                                 |
| Key results              | 18  | Summarise key results with reference to study objectives<br><a href="#">P.13 Lines 23-25 and P.14 Lines 1-14 (Discussion)</a>                                                                                                                                                                                                                                                                                                                                                                                                                                   |
| Limitations              | 19  | Discuss limitations of the study, taking into account sources of potential bias or imprecision. Discuss both direction and magnitude of any potential bias<br><a href="#">P.4 Lines 10-14 (Limitations) and P.15 Lines 20-21 (Discussion)</a>                                                                                                                                                                                                                                                                                                                   |
| Interpretation           | 20  | Give a cautious overall interpretation of results considering objectives, limitations, multiplicity of analyses, results from similar studies, and other relevant evidence<br><a href="#">P.14 Lines 21-25 and P.15 Lines 1-15 (Discussion)</a>                                                                                                                                                                                                                                                                                                                 |
| Generalisability         | 21  | Discuss the generalisability (external validity) of the study results<br><a href="#">P.15 Lines 16-20 (Discussion)</a>                                                                                                                                                                                                                                                                                                                                                                                                                                          |
| <b>Other information</b> |     |                                                                                                                                                                                                                                                                                                                                                                                                                                                                                                                                                                 |
| Funding                  | 22  | Give the source of funding and the role of the funders for the present study and, if applicable, for the original study on which the present article is based<br><a href="#">P.16 Lines 1-5 (Funding)</a>                                                                                                                                                                                                                                                                                                                                                       |

\*Give information separately for exposed and unexposed groups.

**Note:** An Explanation and Elaboration article discusses each checklist item and gives methodological background and published examples of transparent reporting. The STROBE checklist is best used in conjunction with this article (freely

1  
2  
3  
4  
5  
6  
7  
8  
9  
10  
11  
12  
13  
14  
15  
16  
17  
18  
19  
20  
21  
22  
23  
24  
25  
26  
27  
28  
29  
30  
31  
32  
33  
34  
35  
36  
37  
38  
39  
40  
41  
42  
43  
44  
45  
46  
47  
48  
49  
50  
51  
52  
53  
54  
55  
56  
57  
58  
59  
60

available on the Web sites of PLoS Medicine at <http://www.plosmedicine.org/>, Annals of Internal Medicine at <http://www.annals.org/>, and Epidemiology at <http://www.epidem.com/>). Information on the STROBE Initiative is available at [www.strobe-statement.org](http://www.strobe-statement.org).

For peer review only

# BMJ Open

## Method Effects Associated with Negatively and Positively Worded Items on the 12-Item General Health Questionnaire (GHQ-12): results from a cross-sectional survey with a representative sample of Catalanian workers

|                                 |                                                                                                                                                                                                                                                |
|---------------------------------|------------------------------------------------------------------------------------------------------------------------------------------------------------------------------------------------------------------------------------------------|
| Journal:                        | <i>BMJ Open</i>                                                                                                                                                                                                                                |
| Manuscript ID                   | bmjopen-2019-031859.R2                                                                                                                                                                                                                         |
| Article Type:                   | Original research                                                                                                                                                                                                                              |
| Date Submitted by the Author:   | 03-Sep-2019                                                                                                                                                                                                                                    |
| Complete List of Authors:       | Rodrigo, Maria F.; University of Valencia<br>Molina, J. Gabriel; University of Valencia<br>Losilla, Josep-Maria; Autonomous University of Barcelona<br>Vives, Jaume; Autonomous University of Barcelona<br>Tomás, José; University of Valencia |
| <b>Primary Subject Heading</b>: | Mental health                                                                                                                                                                                                                                  |
| Secondary Subject Heading:      | Research methods, Mental health                                                                                                                                                                                                                |
| Keywords:                       | psychological health, General Health Questionnaire (GHQ-12), method effects, item wording effects, confirmatory factor analysis                                                                                                                |
|                                 |                                                                                                                                                                                                                                                |

SCHOLARONE™  
Manuscripts

1  
2  
3  
4  
5  
6  
7  
8  
9  
10  
11  
12  
13  
14  
15  
16  
17  
18  
19  
20  
21  
22  
23  
24  
25  
26  
27  
28  
29  
30  
31  
32  
33  
34  
35  
36  
37  
38  
39  
40  
41  
42  
43  
44  
45  
46  
47  
48  
49  
50  
51  
52  
53  
54  
55  
56  
57  
58  
59  
60

1 **Title**

2 Method Effects Associated with Negatively and Positively Worded Items on the 12–Item General  
3 Health Questionnaire (GHQ–12): results from a cross-sectional survey with a representative  
4 sample of Catalanian workers

6 2. Authors and affiliation

7 Rodrigo, Maria F.  
8 Department of Methodology for the Behavioral Sciences  
9 University of Valencia  
10 Valencia (Spain)

12 Molina, J. Gabriel †  
13 Department of Methodology for the Behavioral Sciences  
14 University of Valencia  
15 Valencia (Spain)

17 Losilla, Josep-Maria  
18 Department of Psychobiology and Methodology of Health Sciences  
19 Universitat Autònoma de Barcelona  
20 Barcelona (Spain)

22 Vives, Jaume  
23 Department of Psychobiology and Methodology of Health Sciences  
24 Universitat Autònoma de Barcelona  
25 Barcelona (Spain)

27 Tomás, José M.  
28 Department of Methodology for the Behavioral Sciences  
29 University of Valencia  
30 Valencia (Spain)

32 †Deceased September 26, 2014

34 3. Word count, excluding title page, abstract, references, figures and tables: 3119

36 4. Authors' statements

37 All authors have agreed to authorship in the indicated order.

38 All authors declare that this paper is an original unpublished work and it is not being submitted  
39 elsewhere.

40 All authors do not have any financial interests that might be interpreted as influencing the research,  
41 and APA ethical standard were followed in the conduct of the study.

1  
2  
3  
4  
5  
6  
7  
8  
9  
10  
11  
12  
13  
14  
15  
16  
17  
18  
19  
20  
21  
22  
23  
24  
25  
26  
27  
28  
29  
30  
31  
32  
33  
34  
35  
36  
37  
38  
39  
40  
41  
42  
43  
44  
45  
46  
47  
48  
49  
50  
51  
52  
53  
54  
55  
56  
57  
58  
59  
60

1 5. Ethics statement.

2 The research was not submitted to approval by an institutional review board since this is not a  
3 requirement at our universities for this type of study.

4 Ethics approval was not sought for this study since this was a secondary analysis of anonymized  
5 data.

6

7 6. Data availability statement

8 Data is publicly available upon request to the Catalanian Labor Relations and Quality of Work  
9 Department.

10

11 7. Contact information for the corresponding author:

12 Jaume Vives

13 Department of Psychobiology and Methodology of Health Sciences

14 Universitat Autònoma de Barcelona

15 Edifici B - Despatx B5b/081

16 Carrer de la Fortuna / Carrer de Ca n'Altayó. Campus de la UAB

17 08193 Bellaterra (Cerdanyola del Vallès). Barcelona (Spain)

18 E-mail: jaume.vives@uab.cat

19 Phone: +34 93 581 23 31

## 1           2           3           4           5           6           7           8           9           10           11           12           13           14           15           16           17           18           19           20           21           22           23           24           25           26           27           28           29           30           31           32           33           34           35           36           37           38           39           40           41           42           43           44           45           46           47           48           49           50           51           52           53           54           55           56           57           58           59           60

### 1   **Abstract**

2   **Objective.** Recent studies into the factorial structure of the 12–item version of the General Health  
3   Questionnaire (GHQ–12) have shown that it was best represented by a single substantive factor  
4   when method effects associated with negatively worded (NW) items are considered. The purpose of  
5   the present study was to examine the presence of method effects, and their relationships with  
6   demographic covariates, associated with positively worded (PW) and/or NW items.

7   **Design.** A cross-sectional, observational study to compare a comprehensive set of confirmatory  
8   factor models, including method effects associated with PW and/or NW items with GHQ-12  
9   responses.

10   **Setting.** Representative sample of all employees living in Catalonia (Spain).

11   **Participants.** 3050 participants (44.6% women) who responded the Second Catalonian Survey of  
12   Working Conditions.

13   **Results.** A confirmatory factor analysis showed that the best–fitting model was a unidimensional  
14   model with two additional uncorrelated method factors associated with PW and NW items.  
15   Furthermore, structural equation modeling revealed that method effects were differentially related  
16   to both the sex and age of the respondents.

17   **Conclusion.** Individual differences related to sex and age can help to identify respondents who are  
18   prone to answering PW and NW items differently. Consequently, is desirable that both the  
19   constructs of interest as well as the effects of method factors are considered in SEM models as a  
20   means of avoiding the drawing of inaccurate conclusions about the relationships between the  
21   substantive factors.

### 22           23           24           25           26           27           28           29           30           31           32           33           34           35           36           37           38           39           40           41           42           43           44           45           46           47           48           49           50           51           52           53           54           55           56           57           58           59           60

### 24   **Keywords**

25   psychological health, General Health Questionnaire (GHQ–12), method effects, item wording



1  
2  
3 1 effects, confirmatory factor analysis  
4  
5  
6 2  
7  
8  
9  
10  
11  
12  
13  
14  
15  
16  
17  
18  
19  
20  
21  
22  
23  
24  
25  
26  
27  
28  
29  
30  
31  
32  
33  
34  
35  
36  
37  
38  
39  
40  
41  
42  
43  
44  
45  
46  
47  
48  
49  
50  
51  
52  
53  
54  
55  
56  
57  
58  
59  
60

1  
2  
3  
4  
5  
6  
7  
8  
9  
10  
11  
12  
13  
14  
15  
16  
17  
18  
19  
20  
21  
22  
23  
24  
25  
26  
27  
28  
29  
30  
31  
32  
33  
34  
35  
36  
37  
38  
39  
40  
41  
42  
43  
44  
45  
46  
47  
48  
49  
50  
51  
52  
53  
54  
55  
56  
57  
58  
59  
60

## 1 **Strengths and limitations of this study**

2

### 3 **Strengths**

- 4 • Sampling quality: A random and large representative sample of workers and face-to-face  
5 administration by professional interviewers.
- 6 • Comparison of confirmatory models for positively and/or negatively worded items and the  
7 use of two different parameterizations. Previous works on the GHQ-12 have not included  
8 such a set of competing models.
- 9 • Investigation of demographic correlates of wording effects. There are no previous works on  
10 this subject on the GHQ-12.

11

### 12 **Limitations**

- 13 • The different response scale used for the NW items and the PW items in the questionnaire  
14 could be a confusion variable.
- 15 • The results might not be generalized to other specific populations as, for example,  
16 adolescents and elderly retired people.

## 1 Introduction

Originally developed by Goldberg[1], the General Health Questionnaire (GHQ) has been widely used as a screening instrument for measuring General Psychological Health (GPH) in both community and non-psychiatric clinical settings[2]. The shortest 12-item version (GHQ-12) is the most popular and has been employed on different settings and in several countries, as well as part of multiple major national health, social wellbeing and occupational surveys, achieving results which underline the fact that it is highly reliable and valid[3-11].

Despite its broad application, the factor structure underlying the responses to the GHQ-12 remains a controversial issue. In this sense, although the GHQ-12 was originally developed as a unidimensional scale, this one-factor latent structure has found little empirical support and some alternative multidimensional models have been proposed as more appropriate. Thus, the one with the most empirical support is the three-factor model proposed by Graetz[5,12-22]. It is important to note that the 6 positively worded (PW) items make up the first factor, whereas the other two factors are made up of the 6 negatively worded (NW) items (see Figure 1, Model 8). On the other hand, the bidimensional model, where the 6 NW and the 6 PW items in the GHQ-12 are grouped into two factors, has also obtained wide support, especially in studies based on exploratory factor analysis [5,10,23-28]. The arguments against these models and in favor of the unidimensional solution are the high correlations between the factors [13] and the low discriminant validity of the factor scores derived from these models[16,29,30].

As Hankins[31] points out, multifactor models may just be the resulting artifact of the inclusion of PW and NW items in the questionnaire and so, the controversy about the factorial structure of the GHQ-12 might relate to the effect of item wording on subjects' response patterns as part of a more general category called 'method'[32,33]. Hankins[31] found that, after modeling the wording effects for the NW items, the unidimensional model fitted better than both the two-factor model (NW vs. PW items) and Graetz's three-factor model. Other studies have called into question

1  
2  
3  
4  
5  
6  
7  
8  
9  
10  
11  
12  
13  
14  
15  
16  
17  
18  
19  
20  
21  
22  
23  
24  
25  
26  
27  
28  
29  
30  
31  
32  
33  
34  
35  
36  
37  
38  
39  
40  
41  
42  
43  
44  
45  
46  
47  
48  
49  
50  
51  
52  
53  
54  
55  
56  
57  
58  
59  
60

1 the substantive meaning of the GHQ-12 multifactor solutions, suggesting that they might just be an  
2 artifact due to the wording effects associated with NW items[29,30,34-40]. See Molina et al.[36]  
3 for a deeper review about the dimensionality of GHQ-12.

4 Some studies about other instruments, however, suggested not only considering the wording  
5 effects for the NW items but also for the PW items[41,42]. Regarding GHQ-12, only a recent meta-  
6 analysis modelled the presence of method effects for negatively and positively worded items  
7 concluding that positively keyed items explained incremental variance beyond a general mental  
8 health factor[43].

9 Therefore, another source of variability in the results about the factor structure of the GHQ-  
10 12 could come from the statistical control of method biases, that has been mainly achieved through  
11 the correlated traits-correlated methods (CTCM) and the correlated traits-correlated uniquenesses  
12 (CTCU) confirmatory factor analysis models. Both procedures have been used in GHQ-12, to deal  
13 with method effects applying the CTCM model [i.e., 30,44] the CTCU model [i.e., 29,31,39,40], or  
14 both CTCM and CTCU [i.e., 34-37].

15 To date, we have not found any study about GHQ-12 that analyze the wording effects  
16 associated with either PW items alone, nor with NW and PW items simultaneously, comparing both  
17 CTCU and CTCM models. There are several multivariate statistical models for analyzing method  
18 effect, and among them the CFA based approaches are the most popular ones [45]. Among the  
19 different CFA models stand out the CFA with correlated traits and correlated methods (CFA-  
20 CTCM) and the CFA with correlated traits and correlated uniqueness (CTCU). On one hand, the  
21 CTCM model specifies that indicators' variance can be explained by a linear combination of trait,  
22 method, and error effects [46], with trait and method effects specified as latent variables. The  
23 CTCM model, when methods are specified independent (uncorrelated), directly translates into the  
24 well-known Bifactor model [47,48]. On the other hand, the CTCU model specifies trait factors  
25 while method effects are modeled correlating the uniqueness of items (indicators) sharing a

1  
2  
3 1 common method [49]. Both CTCM and CTCU models have strengths and shortcomings and  
4  
5 2 therefore are usually employed simultaneously [50]. This work extends the previous work by  
6  
7 3 Molina et al. [36], which compares the fit of the unidimensional model, the multifactor models and  
8  
9 4 the CTCM and CTCU unidimensional models with method effects for only the NW items.

10  
11  
12 5 To clarify, Figure 1 (Model 1 to Model 9) shows the 9 CFA models estimated to test the  
13  
14 6 potential method effects associated with either the PW or the NW, or both. Model 1 is a one factor  
15  
16 7 model of general health. This model also works as a baseline model against which to compare other  
17  
18 8 more complex models. Models 2 and 3 are the CTCU and CTCM models that include method  
19  
20 9 effects for the NW items. These were the best fitting models in Molina et al. [36]. Models 4 and 5  
21  
22 10 are the CTCU and CTCM models including method effects for the PW items. Model 6 is the CTCM  
23  
24 11 model including method factors for both the NW and PW items (a CTCU model with method  
25  
26 12 effects for both PW and NW items was not estimated because it is not identified). Model 7 is a  
27  
28 13 bifactor model with a general trait factor of general health and two method factors associated to NW  
29  
30 14 and PW items. The three factors are independent (uncorrelated). Additionally, and considering the  
31  
32 15 best fitting multidimensional model in Tomás, Gutiérrez and Sancho [51] based on the results by  
33  
34 16 Graetz [12], models 8 and 9 were also tested. Model 8 posited three substantive dimensions: social  
35  
36 17 dysfunction, anxiety and depression, and loss of confidence. Model 9 included an additional method  
37  
38 18 factor associated to NW items. Models considering a method factor associated to PW items made  
39  
40 19 no sense as all PW items were indicators of social dysfunction.

41  
42 20 As stressed by Marsh et al. [52], it becomes necessary to consider this comprehensive set of  
43  
44 21 competing models to determine the relative importance and substantive nature of the method  
45  
46 22 effects.

47  
48  
49  
50  
51  
52  
53  
54 23  
55  
56 24  
57

Figure 1

58 25 Finally, there has been some research carried out on the demographic correlates of method  
59  
60

1  
2  
3 1 effects, such as sex[53–57], age[55,58] or educational level[41,59]. With respect to the GHQ–12, to  
4  
5 2 date, we have not found any studies that analyze demographic correlates of method effects.  
6  
7

8 3 Building on the previous studies, the first aim of this study was to overcome the limitation  
9  
10 4 pointed out in Molina et al.[36] and examine method effects associated with both positive and  
11  
12 5 negative wording. The second aim was to further understand the meaning of the method factors;  
13  
14 6 therefore, we evaluated the relationships between the method factors and three covariates (i.e., the  
15  
16 7 sex, age, and educational level) in the framework of a structural equation model (SEM).  
17  
18  
19 8

## 21 9 **Method**

### 22 10 *Participants*

23  
24 11 The data used in this study came from the Second Catalonian Survey of Working Conditions[60]  
25  
26 12 and were based on a representative random sample of all employees living in Catalonia (Spain).  
27  
28 13 Data were collected between September and November 2010 by professional interviewers in private  
29  
30 14 households. The sample comprised a total of 3,050 participants who responded to the GHQ–12  
31  
32 15 included in the survey. Main sociodemographic characteristics of the sample are shown in Table 1.  
33  
34  
35  
36

37 16 Table 1. *Main sociodemographic characteristics.*

|                                          | M (SD)        | n (%)       | Range |
|------------------------------------------|---------------|-------------|-------|
| <i>Gender</i>                            |               |             |       |
| Women                                    |               | 1361 (44.6) |       |
| <i>Age</i>                               | 40.46 (11.19) |             | 17-82 |
| <i>Education</i>                         |               |             |       |
| Incomplete primary studies               |               | 90 (3.0)    |       |
| Primary studies                          |               | 541 (17.9)  |       |
| Secondary studies. 1 <sup>st</sup> stage |               | 637 (21.0)  |       |
| Associate degree                         |               | 763 (25.2)  |       |
| High School                              |               | 598 (19.8)  |       |
| Graduate studies                         |               | 359 (11.9)  |       |
| Postgraduate studies                     |               | 39 (1.3)    |       |

1  
2  
3 1 *Note.* *M* = Mean; *SD* = Standard Deviation  
4

5 2 *Public Involvement*  
6

7 3 Respondents were not involved in any stage of the design of the study and were only requested to  
8  
9  
10 4 respond the survey. In the selected households, interviewers identified themselves personally and  
11  
12 5 informed this was an official survey about the working conditions of employed Catalanian people  
13  
14 6 commissioned by the Catalanian Government Work Department.  
15

16 7 Results were published on the Catalanian Government Work Department website[60] and are  
17  
18 8 available at  
19

20  
21 9 [https://treball.gencat.cat/ca/ambits/seguretat\\_i\\_salut\\_laboral/publicacions/estadistiques\\_estudis/ci/ii](https://treball.gencat.cat/ca/ambits/seguretat_i_salut_laboral/publicacions/estadistiques_estudis/ci/ii)  
22  
23 10 [ecct/treballadors/](https://treball.gencat.cat/ca/ambits/seguretat_i_salut_laboral/publicacions/estadistiques_estudis/ci/ii)  
24

25  
26 11 *Measures*  
27

28 12 The GHQ–12 is a self–report scale that contains 6 PW items (e.g. “Have you been able to face up to  
29  
30 13 problems?”) and 6 NW items (e.g. “Have you been losing confidence in yourself?”). The GHQ–12  
31  
32 14 was validated in Spain by Lobo and Muñoz[61]. Table 2 shows the statements of these items in the  
33  
34 15 same order as they were presented in the survey. It must be noted that the GHQ–12 has a different  
35  
36 16 response scale for the PW items (i.e.: *more than usual*; *same as usual*; *less than usual*; and *much*  
37  
38 17 *less than usual*) and the NW items (i.e.: *not at all*; *no more than usual*; *rather more than usual*; and  
39  
40 18 *much more than usual*). Accordingly, the 4–point scoring scheme was applied in our study so total  
41  
42 19 scores in the GHQ–12 ranged from 0 to a maximum of 36, with higher scores indicating lower  
43  
44 20 levels of GPH.  
45  
46  
47

48 21 Table 2. *Descriptive statistics, standardized factor loadings from Model 7 and correlations between the*  
49  
50 22 *Model 7 factors and the covariates*  
51

| <i>Item</i>                   | <i>M</i> | <i>SD</i> | Model 7    |           |           |
|-------------------------------|----------|-----------|------------|-----------|-----------|
|                               |          |           | <i>GPH</i> | <i>PW</i> | <i>NW</i> |
| Item 1. Able to concentrate   | 1.03     | 0.37      | .42*       | .49*      |           |
| Item 2. Lost sleep over worry | 0.57     | 0.75      | .78*       |           | .07       |

1  
2  
3  
4  
5  
6  
7  
8  
9  
10  
11  
12  
13  
14  
15  
16  
17  
18  
19  
20  
21  
22  
23  
24  
25  
26  
27  
28  
29  
30  
31  
32  
33  
34  
35  
36  
37  
38  
39  
40  
41  
42  
43  
44  
45  
46  
47  
48  
49  
50  
51  
52  
53  
54  
55  
56  
57  
58  
59  
60

|                                                     |      |      |      |      |
|-----------------------------------------------------|------|------|------|------|
| Item 3. Playing a useful part in things             | 0.96 | 0.31 | .09* | .59* |
| Item 4. Capable of making decisions                 | 0.96 | 0.30 | .14* | .70* |
| Item 5. Constantly under strain                     | 0.71 | 0.79 | .83* | .03  |
| Item 6. Could not overcome difficulties             | 0.44 | 0.66 | .76* | .25* |
| Item 7. Enjoy day-to-day activities                 | 1.01 | 0.40 | .53* | .55* |
| Item 8. Face up to problems                         | 0.99 | 0.32 | .39* | .60* |
| Item 9. Feeling unhappy and depressed               | 0.37 | 0.66 | .78* | .38* |
| Item 10. Losing confidence in yourself              | 0.19 | 0.48 | .53* | .70* |
| Item 11. Thinking of yourself as a worthless person | 0.12 | 0.40 | .48* | .72* |
| Item 12. Feeling reasonably happy                   | 0.99 | 0.38 | .44* | .72* |

---

Relations between the Model 7 factors and the socio-demographic variables

---

|                   |  |  |      |       |      |
|-------------------|--|--|------|-------|------|
| Sex               |  |  | .13* | -.08* | -.02 |
| Age               |  |  | .11* | .08*  | .01  |
| Educational level |  |  | .00  | -.02  | -.06 |

---

1 *Note.* *M* = Mean; *SD* = Standard Deviation; *GPH* = General Health Psychology factor; *PW* = Positive Wording factor;

2 *NW* = Negative Wording factor. \**p* < .05



1  
2  
3 1 For the purposes of exploring the correlates of method effects (i.e., item wording effects),  
4  
5 2 we used the following three covariates: (a) sex (0= men and 1= women); (b) age; and (c)  
6  
7 3 educational level, which was measured as a self-reported question with 7 response graduated  
8  
9 4 categories ranging from *incomplete primary studies* to *postgraduate studies*. The educational level  
10  
11 5 was scored as the highest level of education reached.  
12  
13  
14  
15 6

### 17 7 *Statistical Analysis*

18  
19 8 A set of competing confirmatory factor models were estimated using MPlus 8.3[62]. Figure 1  
20  
21 9 shows the specification of all these CFA models. The goodness-of-fit indices computed were: the  
22  
23 10 chi-square statistic; the Comparative Fit Index (CFI); the Root Mean Square Error of  
24  
25 11 Approximation (RMSEA) with its 90% confidence interval; and the Standardized Root Mean  
26  
27 12 Square Residual (SRMR). Values greater than 0.95 for CFI and TLI, and lower than 0.06 and 0.08  
28  
29 13 for RMSEA and SRMR, respectively, are considered to indicate good model fit.  
30  
31  
32

33 14 As concerns the estimation of CFA models, most studies into the GHQ-12 factor structure  
34  
35 15 have used maximum likelihood[16,31,35,40,44]. This estimation method relies on several  
36  
37 16 assumptions which should be met to be confident about the results obtained. This is the case of the  
38  
39 17 assumption of multivariate normality which implies, first, that the variables are continuous in nature  
40  
41 18 and, second, that the joint distribution of the variables is normal. The first condition is unlikely to  
42  
43 19 be met with the GHQ-12 Likert-type response data; nor is the second if the variables depart  
44  
45 20 markedly from normality as is the case for the responses to the NW items which were heavily  
46  
47 21 positively skewed (see Figure 2). An alternative when these conditions are not met is to use the  
48  
49 22 weighted least squares (WLS) estimator [63], which has already been used in some studies about  
50  
51 23 the GHQ-12 factor structure[13,18,20,29] and it will be the estimation method used here. Thus, the  
52  
53 24 various CFA models were estimated using Diagonally WLS.  
54  
55  
56  
57

58 25 Finally, correlates of the GHQ-12 factors were evaluated using SEM through the inclusion  
59  
60

1  
2  
3  
4  
5  
6  
7  
8  
9  
10  
11  
12  
13  
14  
15  
16  
17  
18  
19  
20  
21  
22  
23  
24  
25  
26  
27  
28  
29  
30  
31  
32  
33  
34  
35  
36  
37  
38  
39  
40  
41  
42  
43  
44  
45  
46  
47  
48  
49  
50  
51  
52  
53  
54  
55  
56  
57  
58  
59  
60

1 in the finally selected model of the 3 covariates considered in this study: sex was treated as  
2 categorical, whereas age and educational level were treated as continuous variables.

## Figure 2

### Results

The goodness-of-fit statistics and indices obtained for the 9 models compared here are shown in Table 3.

Table 3. *Fit indexes for the alternative models of the 12-item General Health Questionnaire*

| <i>Models</i>  | <i>df</i> | <i>Chi-</i> | <i>CFI</i> | <i>RMSEA [90% CI]</i> | <i>SRMR</i> |
|----------------|-----------|-------------|------------|-----------------------|-------------|
| <i>Model 1</i> | 54        | 5378.68     | .77        | .180 [.176, .184]     | .119        |
| <i>Model 2</i> | 39        | 928.099     | .96        | .086 [.082, .091]     | .049        |
| <i>Model 3</i> | 48        | 1345.38     | .95        | .094 [.090, .059]     | .061        |
| <i>Model 4</i> | 39        | 934.690     | .96        | .087 [.083, .092]     | .052        |
| <i>Model 5</i> | 48        | 1275.28     | .95        | .092 [.087, .096]     | .058        |
| <i>Model 6</i> | 41        | 497.520     | .98        | .060 [.056, .065]     | .030        |
| <i>Model 7</i> | 42        | 507.741     | .98        | .060 [.056, .065]     | .030        |
| <i>Model 8</i> | 51        | 1142.88     | .95        | .084 [.080, .088]     | .054        |
| <i>Model 9</i> | 45        | 960.388     | .96        | .082 [.078, .086]     | .049        |

Notes: Models are specified in Figure 1; CFI = Comparative Fit Index; RMSEA = Root Mean Square Error of Approximation; CI = Confidence Interval; SRMR = Standardized Root Mean Square Residual.

Model 1, with a single factor of general health, and model 8, with three substantive factors, had worse fit than the models that include wording effects. That is, a careful look at fit indexes makes clear that the inclusion of method effects always improves model fit. Indeed, both NW and PW method effects are needed to get the best fitting models. These best fitting models were models 6 and 7. Their fit was practically indistinguishable and, given that they only differ in that model 7 is more parsimonious because constrains method factors correlation to zero, it will be retained as the best representation of the observed data.

1  
2  
3 1 An in-depth inspection of the parameter estimates in Model 7 (see Table 2) showed that all  
4  
5 2 factor loadings were statistically significant for the three factors, except for items 2 and 5 in the  
6  
7 3 method factor comprising the NW items.  
8  
9

10 4 Finally, a statistical analysis of the relationships between the latent factors in Model 7 and  
11  
12 5 the 3 covariates considered in this study (i.e. sex, age and educational level) was performed through  
13  
14 6 a MIMIC SEM model in which the effects between the 3 latent factors in Model 7 and the 3  
15  
16 7 covariates were freely estimated, the focus being on the relationships between the method factors  
17  
18 8 and the covariates. The model fit was excellent (RMSEA = .040; RMSEA 90% IC = [.037, .049];  
19  
20 9 CFI = .99; SRMR = .029). As can be seen in Table 2, the relations of age with the method factors  
21  
22 10 were near to 0 and statistically non-significant for NW items, and positive and significant although  
23  
24 11 small with PW items (.08). Sex was significantly related with the method factor associated with PW  
25  
26 12 items (−.08), whereas the educational level was not significantly related to method factors. Thus,  
27  
28 13 men and women differ in the way they answer PW items, meaning that men are slightly more likely  
29  
30 14 than women to endorse PW items, and method effects associated to PW items also increased by age.  
31  
32  
33  
34  
35  
36  
37  
38

## 39 16 **Discussion**

40 17 This study focused on the examination of the latent structure underlying the responses to the GHQ–  
41  
42 18 12, considering the role of method effects associated with both, positive and negative items  
43  
44 19 wording, and using two alternative parameterizations of the CFA measurement models. What  
45  
46 20 should first be noted is that the studies that have included method effects in the measurement model  
47  
48 21 of the GHQ–12 have been more the exception than the rule in previous research into the factor  
49  
50 22 structure of this questionnaire.  
51  
52  
53

54 23 According to the results of the present study, we conclude that the GHQ–12 factor structure  
55  
56 24 is best characterized by introducing latent method factors that capture both the method effects  
57  
58 25 associated with NW and PW items (Model 7). These results support the conclusion from previous  
59  
60

1  
2  
3 1 research that the good fit obtained by multidimensional models (mainly the two-factor model and  
4  
5 2 the three-factor Graetz's model) could simply be explained by the artificial grouping of PW and  
6  
7 3 NW items. However, the interpretation of the latent (method) factors as purely integrating method  
8  
9 4 bias due to wording is not straightforward. It is obvious that NW and PW items share the wording.  
10  
11  
12 5 It is also clear that this three bifactor model (one trait and two method factors) fitted the data best.  
13  
14 6 And finally, there is a lot of empirical evidence on these wording effects. However, it is also  
15  
16 7 relevant to discuss the large loadings of many items on the method factors, being these loadings  
17  
18 8 sometimes larger than their loadings in the trait factor. The general factor explains a 52% of the  
19  
20 9 shared variance, but there are some items that deserve careful attention. For example, items 3  
21  
22 10 ("playing useful part in things") and 4 ("capable of making decisions") had very low loads on the  
23  
24 11 trait factor. If we understand PW method factor as only method bias, then it follows that these two  
25  
26 12 items are purely method effects, but surely they must share some trait variance. In the same vein,  
27  
28 13 items 10 ("losing confidence in yourself") and 11 ("thinking of yourself as a worthless person")  
29  
30 14 load very high in the NW method factor and, as a reviewer pointed out, a likely (post-hoc)  
31  
32 15 explanation is that wording bias are still confounded with a confidence/self-image factor. Therefore,  
33  
34 16 the interpretation of these effects as purely method may be compromised and, accordingly, the  
35  
36 17 interpretation of an overall score for the scale difficult.  
37  
38  
39  
40  
41

42 18 The second aim of this study was to examine the relationships between the method factors  
43  
44 19 associated with both NW and PW items and three demographic variables, namely, the sex, age and  
45  
46 20 educational level of the respondents. Regarding the sex, we found a statistically significant, but  
47  
48 21 weak, relationship between PW and sex, so that men were more likely than women to endorse PW  
49  
50 22 items. These results are in line with previous works that, in the context of RSES, have found sex  
51  
52 23 differences in wording effects[56,57]. As for the explanatory role of age on method effects, we  
53  
54 24 found that the relationship between age and the negative wording effect was not statistically  
55  
56 25 significant, which supports previous research using other questionnaires (e.g., self-esteem  
57  
58  
59  
60

1  
2  
3 1 scales,[50]; Hospital Anxiety & Depression Scale,[64]). Moreover, our results give support to  
4  
5 2 previous studies which had stated that, in older adults, the strongest method effects would be  
6  
7  
8 3 associated with PW items, rather than NW items[55,58].  
9

10 4 As to the educational level, we found that there was not a significant correlation of this  
11  
12 5 variable on the two method factors. This result supports and extends the evidence obtained in  
13  
14 6 Tomás et al.[50], that found that the educational level of the respondents had no effect on the  
15  
16  
17 7 negative method factor using self-esteem questionnaires. This results contradicts previous research  
18  
19 8 on the relationship of the negative wording factor and the educational level/verbal ability with  
20  
21 9 different questionnaires and samples[41,64–69].  
22  
23

24 10 Overall, the significant effects of sex and age on trait and method factors point out that  
25  
26 11 women have a worse wellbeing, but this effect is partly modified by a method effect on the  
27  
28 12 positively worded items, whereas the results for age suggest that older respondents have worse  
29  
30 13 well-being and this effect is magnified by a method effect on the positive wording factor. The  
31  
32  
33 14 results on the individual differences related to the demographic variables considered in this study  
34  
35 15 cannot only help to understand the presence of wording method effects but also to identify  
36  
37 16 respondents who are prone to answering PW and NW items differently. In this sense, the  
38  
39  
40 17 relationship that appears as more evident is for the age and sex variables.  
41

42 18 Another practical consequence of our study concerns the relationship between the intended  
43  
44 19 measure of the GHQ–12 (i.e., the GPH factor) and other constructs of interest. Several studies have  
45  
46 20 shown that method effects can inflate, deflate or have no effect at all on estimates of the relationship  
47  
48 21 between two constructs (see Podsakoff[70], for a further review of the effects that method biases  
49  
50  
51 22 have on individual measures and on the covariation between different constructs). Thus, it is  
52  
53 23 desirable that both the constructs of interest as well as the effects of method factors, like positive  
54  
55 24 and negative wording, are considered in SEM models as a means of controlling these systematic  
56  
57  
58 25 sources of bias and, thus, avoiding the drawing of inaccurate conclusions about the relationships  
59  
60

1  
2  
3 1 between the substantive factors.  
4

5 2 Previous research on the GHQ-12 (e.g.[31,36]) has outlined the asymmetry in the  
6  
7 3 participants' responses as a function of the wording of the items, as well as the different responses  
8  
9 4 scales for the positive and negative items. This asymmetry in the participants' responses as a  
10  
11 5 function of the wording of the items is consistent with results from previous research into wording  
12  
13 6 effects for contrastive survey questions[71]. The extent to which the presence of method effects is  
14  
15 7 linked to the asymmetric pattern of responses and/or to the different response scales for the PW and  
16  
17 8 NW items in the GHQ-12 should be examined in future research.  
18  
19  
20

21 9 Comparing the current work with previous studies into the factorial structure of the GHQ-  
22  
23 10 12, to our knowledge, this is the first study that, on the one hand, tests a comprehensive set of  
24  
25 11 models including method effects associated with both PW and NW items and also explores some  
26  
27 12 demographic correlates of these method effects. Another strength of this work was the fact that it  
28  
29 13 used a large representative sample of workers, but the results might not be generalized to other  
30  
31 14 specific populations, for example, adolescents and elderly retired people.  
32  
33  
34  
35  
36  
37  
38  
39  
40  
41  
42  
43  
44  
45  
46  
47  
48  
49  
50  
51  
52  
53  
54  
55  
56  
57  
58  
59  
60

1  
2  
3 **1 Funding**  
4 2

5 3 This work was supported by the Grant PGC2018-100675-B-I00, Spanish Ministry of  
6 4 Science, Innovation and Universities (Spain). The funders had no role in the study design, data  
7 5 collection and analysis, decision to publish, or preparation of the manuscript.  
8 6  
9 6

10 6  
11 **7 Competing interests**

12 8 No conflict of interest has been declared by the authors.  
13 9  
14 9

15 **10 Contributorship Statement**

16 11 All authors meet the criteria recommended by the International Committee of Medical Journal  
17 12 Editors, ICMJE. All authors made substantial contributions to conception and design, acquisition of  
18 13 data, or analysis and interpretation of data. MFR and GM: drafted the article. JV and JML: critically  
19 14 revised the draft for important intellectual content. JMT worked in the statistical analysis and  
20 15 interpretation of data. All authors agreed on the final version.  
21  
22  
23  
24  
25  
26  
27  
28  
29  
30  
31  
32  
33  
34  
35  
36  
37  
38  
39  
40  
41  
42  
43  
44  
45  
46  
47  
48  
49  
50  
51  
52  
53  
54  
55  
56  
57  
58  
59  
60

## References

- 1 Goldberg DP. *The detection of psychiatric illness by questionnaire*. London: : Oxford University Press 1972.
- 2 Goldberg DP, Williams P. *A user's guide to the General Health Questionnaire*. Windsor, United Kingdom: : NFER-Nelson 1988.
- 3 Bhui K, Bhugra D, Goldberg D. Cross-cultural validity of the Amritsar Depression Inventory and the General Health Questionnaire amongst English and Punjabi primary care attenders. *Soc Psychiatry Psychiatr Epidemiol* 2000;**35**:248–54.
- 4 Daradkeh TK, Ghubash R, El-Rufaie O. Reliability, validity, and factor structure of the Arabic version of the 12-item General Health Questionnaire. *Psychol Rep* 2001;**89**:85–94.
- 5 Gelaye B, Tadesse MG, Lohsoonthorn V, *et al*. Psychometric properties and factor structure of the General Health Questionnaire as a screening tool for anxiety and depressive symptoms in a multi-national study of young adults. *J Affect Disord* 2015;**187**:197–202. doi:10.1016/J.JAD.2015.08.045
- 6 Goldberg DP, Gater R, Sartorius N, *et al*. The validity of two versions of the GHQ in the WHO study of mental illness in general health care. *Psychol Med* 1997;**27**:191–7.
- 7 Lundin A, Hallgren M, Theobald H, *et al*. Validity of the 12-item version of the General Health Questionnaire in detecting depression in the general population. *Public Health* 2016;**136**:66–74. doi:10.1016/J.PUHE.2016.03.005
- 8 Rocha K, Pérez K, Rodríguez-Sanz M, *et al*. Propiedades psicométricas y valores normativos del General Health Questionnaire (GHQ-12) en población general española. *Int J Clin Heal Psychol* 2011;**11**:125–39.
- 9 Sanchez-Lopez MP, Dresch V. The 12-item General Health Questionnaire (GHQ-12): Reliability, external validity and factor structure in the Spanish population. *Psicothema* 2008;**20**:839–43.



- 1  
2  
3 1 10 Schmitz N, Kruse J, Tress W. Psychometric properties of the General Health Questionnaire  
4  
5 2 (GHQ-12) in a German primary care sample. *Acta Psychiatr Scand* 1999;**100**:462–8.  
6  
7 3 11 Tait RJ, French DJ, Hulse GK. Validity and psychometric properties of the General Health  
8  
9 Questionnaire-12 in young Australian adolescents. *Aust N Z J Psychiatry* 2003;**37**:374–81.  
10 4  
11 5 12 Graetz B. Multidimensional properties of the General Health Questionnaire. *Soc Psychiatry*  
12  
13 *Psychiatr Epidemiol* 1991;**26**:132–8.  
14 6  
15 7 13 Campbell A, Knowles S. A confirmatory factor analysis of the GHQ12 using a large  
16  
17 8 Australian sample. In: *European Journal of Psychological Assessment*. 2007. 2–8.  
18  
19 9 14 Cheung YB. A confirmatory factor analysis of the 12-item General Health Questionnaire  
20  
21 10 among older people. *Int J Geriatr Psychiatry* 2002;**17**:739–44.  
22  
23 11 15 French DJ, Tait RJ. Measurement invariance in the General Health Questionnaire-12 in  
24  
25 12 young Australian adolescents. *Eur Child Adolesc Psychiatry* 2004;**13**:1–7.  
26  
27 13 16 Gao F, Luo N, Thumboo J, *et al*. Does the 12-item General Health Questionnaire contain  
28  
29 14 multiple factors and do we need them? *Health Qual Life Outcomes* 2004;**2**:1–7.  
30  
31 15 doi:10.1186/1477-7525-2-63  
32  
33 16 17 Mäkikangas A, Feldt T, Kinnunen U, *et al*. The factor structure and factorial invariance of  
34  
35 18 the 12-item General Health Questionnaire (GHQ-12) across time: Evidence from two  
36  
37 19 community-based samples. *Psychol Assess* 2006;**18**:444–51.  
38  
39 20 18 Padrón A, Galán I, Durbán M, *et al*. Confirmatory factor analysis of the General Health  
40  
41 21 Questionnaire (GHQ-12) in Spanish adolescents. *Qual Life Res* 2012;**21**:1291–8.  
42  
43 22 19 Penninkilampi-Kerola V, Miettunen J, Ebeling H. Health and disability: A comparative  
44  
45 23 assessment of the factor structures and psychometric properties of the GHQ-12 and the  
46  
47 24 GHQ-20 based on data from a Finnish population-based sample. *Scand J Psychol*  
48  
49 2006;**47**:431–40.  
50  
51 25 20 Shevlin M, Adamson G. Alternative factor models and factorial invariance of the GHQ-12: A  
52  
53  
54  
55  
56  
57  
58  
59  
60

1  
2  
3  
4  
5  
6  
7  
8  
9  
10  
11  
12  
13  
14  
15  
16  
17  
18  
19  
20  
21  
22  
23  
24  
25  
26  
27  
28  
29  
30  
31  
32  
33  
34  
35  
36  
37  
38  
39  
40  
41  
42  
43  
44  
45  
46  
47  
48  
49  
50  
51  
52  
53  
54  
55  
56  
57  
58  
59  
60

- 1 large sample analysis using confirmatory factor analysis. *Psychol Assess* 2005;**17**:231–6.
- 2 21 Martin CR, Newell RJ. The factor structure of the 12-item General Health Questionnaire in  
3 individuals with facial disfigurement. *J Psychosom Res* 2005;**59**:193–9.  
4 doi:10.1016/j.jpsychores.2005.02.020
- 5 22 Tomás JM, Meléndez JC, Oliver A, *et al*. Efectos de método en las escalas de Ryff: Un  
6 estudio en población de personas mayores. *Psicológica* 2010;**31**:383–400.
- 7 23 Andrich D, Van Schoubroeck L. The General Health Questionnaire: a psychometric analysis  
8 using latent trait theory. *Psychol Med* 1989;**19**:469–85.
- 9 24 Gao W, Stark D, Bennett MI, *et al*. Using the 12-item General Health Questionnaire to  
10 screen psychological distress from survivorship to end-of-life care: Dimensionality and item  
11 quality. *Psychooncology* 2012;**21**:954–61.
- 12 25 Glozah FN, Pevalin DJ. Factor structure and psychometric properties of the General Health  
13 Questionnaire (GHQ-12) among Ghanaian adolescents. *J Child Adolesc Ment Heal*  
14 2015;**27**:53–7. doi:10.2989/17280583.2015.1007867
- 15 26 Kilic C, Rezaki M, Rezaki B, *et al*. General Health Questionnaire (GHQ-12 & GHQ-28):  
16 Psychometric properties and factor structure of the scales in a Turkish primary care sample.  
17 *Soc Psychiatry Psychiatr Epidemiol* 1997;**32**:327.
- 18 27 Picardi A, Abeni D, Pasquini P. Assessing psychological distress in patients with skin  
19 diseases: Reliability, validity and factor structure of the GHQ-12. *Eur Acad Dermatology*  
20 *Venereol* 2001;**15**:410.
- 21 28 Werneke U, Goldberg DP, Yalcin I, *et al*. The stability of the factor structure of the General  
22 Health Questionnaire. *Psychol Med* 2000;**30**:823.
- 23 29 Aguado J, Campbell A, Ascaso C, *et al*. Examining the factor structure and discriminant  
24 validity of the 12-item General Health Questionnaire (GHQ-12) among Spanish post-partum  
25 women. *Assessment* 2012;**19**:517–25.

- 1  
2  
3 1 30 Ye S. Factor structure of the General Health Questionnaire (GHQ-12): The role of wording  
4 effects. *Pers Individ Dif* 2009;**46**:197–201.  
5  
6 2  
7  
8 3 31 Hankins M. The factor structure of the twelve item General Health Questionnaire (GHQ-12):  
9 the result of negative phrasing? *Clin Pract Epidemiol Ment Heal* 2008;**4**:10.  
10  
11 4  
12 5 32 Harvey RJ, Billings RS, Nilan KJ. Confirmatory factor analysis of the Job Diagnostic  
13 Survey: Good news and bad news. *J Appl Psychol* 1985;**70**:461–8.  
14  
15 6  
16  
17 7 33 Smith N, Stults DM. Factors defined by negatively keyed items: The results of careless  
18 respondents? *Appl Psychol Meas* 1985;**9**:367–73.  
19  
20 8  
21 9 34 Abubakar A, Fischer R. The factor structure of the 12-item General Health Questionnaire in a  
22 literate Kenyan population. *Stress Heal J Int Soc Investig Stress* 2012;**28**:248–54.  
23  
24 10  
25  
26 11 35 Fernandes HM, Vasconcelos-Raposo J. Factorial validity and invariance of the GHQ-12  
27 among clinical and nonclinical samples. *Assessment* 2013;**20**:219–29.  
28  
29 12  
30  
31 13 doi:<http://dx.doi.org/10.1177/1073191112465768>  
32  
33 14 36 Molina JG, Rodrigo MF, Losilla J-M, *et al.* Wording effects and the factor structure of the  
34 12-item General Health Questionnaire (GHQ-12). *Psychol Assess* 2014;**26**:1031–1037.  
35  
36 15  
37 16 doi:10.1037/a0036472  
38  
39  
40 17 37 Motamed N, Edalatian Zakeri S, Rabiee B, *et al.* The Factor Structure of the Twelve Items  
41 General Health Questionnaire (GHQ-12): a Population Based Study. *Appl Res Qual Life*  
42 2018;**13**:303–16. doi:10.1007/s11482-017-9522-y  
43  
44 18  
45 19  
46  
47 20 38 Rey JJ, Abad FJ, Barrada JR, *et al.* The impact of ambiguous response categories on the  
48 factor structure of the GHQ–12. *Psychol Assess* 2014;**26**:1021–30. doi:10.1037/a0036468  
49  
50 21  
51 22 39 Romppel M, Braehler E, Roth M, *et al.* What is the General Health Questionnaire-12  
52 assessing? *Compr Psychiatry* 2013;**54**:406–13. doi:10.1016/j.comppsy.2012.10.010  
53  
54 23  
55  
56 24 40 Smith AB, Oluboyede Y, West R, *et al.* The factor structure of the GHQ-12: The interaction  
57 between item phrasing, variance and levels of distress. *Qual Life Res An Int J Qual Life Asp*  
58  
59 25  
60

- 1  
2  
3 1 *Treat Care Rehabil* 2013;**22**:145–52.  
4  
5 2 41 Marsh HW. Negative item bias in ratings scales for preadolescent children: A cognitive-  
6  
7 developmental phenomenon. *Dev Psychol* 1986;**22**:37–49.  
8 3  
9  
10 4 42 Tomás JM, Oliver A. Rosenberg’s Self-Esteem Scale: Two factors or method effects. *Struct*  
11  
12 5  
13 *Equ Model A Multidiscip J* 1999;**6**:84–98.  
14  
15 6 43 Gnambs T, Staufenbiel T. The structure of the General Health Questionnaire (GHQ-12): two  
16  
17 7 meta-analytic factor analyses. *Health Psychol Rev* 2018;**12**:179–94.  
18  
19 8 doi:10.1080/17437199.2018.1426484  
20  
21 9 44 Wang L, Lin W. Wording effects and the dimensionality of the General Health Questionnaire  
22  
23 (GHQ-12). *Pers Individ Dif* 2011;**50**:1056–61.  
24 10  
25  
26 11 45 Wothke W. Models for multitrait-multimethod matrix analysis. In: Marcoulides GA,  
27  
28 12 Schumacker RE, eds. *Advanced Structural Equation Modeling: Issues and Techniques*.  
29  
30 Mahwah, NJ: : Lawrence Erlbaum Associates 1996.  
31 13  
32  
33 14 46 Jöreskog KG. Analyzing psychological data by structural analysis of covariance matrices. In:  
34  
35 15 Atkinson RC, Krantz DH, Luce RD, *et al.*, eds. *Contemporary developments in mathematical*  
36  
37 16 *psychology. Vol. 2*. San Francisco: : Freeman 1974. 1–56.  
38  
39  
40 17 47 Markon KE. Bifactor and Hierarchical Models: Specification, Inference, and Interpretation.  
41  
42 18 *Annu Rev Clin Psychol* 2019;**15**:51–69. doi:10.1146/annurev-clinpsy-050718-095522  
43  
44 19 48 Reise SP. The Rediscovery of Bifactor Measurement Models. *Multivariate Behav Res*  
45  
46 20 2012;**47**:667–96. doi:10.1080/00273171.2012.715555  
47  
48  
49 21 49 Marsh HW, Bailey M. Confirmatory Factor Analyses of Multitrait-Multimethod Data: A  
50  
51 22 Comparison of Alternative Models. *Appl Psychol Meas* 1991;**15**:47–70.  
52  
53 23 doi:10.1177/014662169101500106  
54  
55  
56 24 50 Tomás JM, Oliver A, Galiana L, *et al.* Explaining method effects associated with negatively  
57  
58 25 worded items in trait and state global and domain-specific self-esteem scales. *Struct Equ*  
59  
60

- 1  
2  
3 1 *Model A Multidiscip J* 2013;**20**:299–313.  
4  
5 2 51 Tomás JM, Gutiérrez M, Sancho P. Factorial Validity of the General Health Questionnaire 12  
6  
7 in an Angolan Sample. *Eur J Psychol Assess* 2017;**33**:116–22. doi:10.1027/1015-  
8 3  
9 5759/a000278  
10 4  
11  
12 5 52 Marsh HW, Scalas LF, Nagengast B. Longitudinal tests of competing factor structures for the  
13  
14 Rosenberg Self-Esteem Scale: Traits, ephemeral artifacts, and stable response styles. *Psychol*  
15 6  
16 *Assess* 2010;**22**:366–81.  
17 7  
18  
19 8 53 DiStefano C, Motl RW. Self-Esteem and method effects associated with negatively worded  
20  
21 items: Investigating factorial invariance by sex. *Struct Equ Model A Multidiscip J*  
22 9  
23 2009;**16**:134–46.  
24 10  
25  
26 11 54 Gana K, Saada Y, Bailly N, *et al.* Longitudinal factorial invariance of the Rosenberg Self-  
27  
28 Esteem Scale: Determining the nature of method effects due to item wording. *J Res Pers*  
29 12  
30 2013;**47**:406–16.  
31 13  
32  
33 14 55 Lindwall M, Barkoukis V, Grano C, *et al.* Method effects: The problem with negatively  
34  
35 versus positively keyed items. *J Pers Assess* 2012;**94**:196–204.  
36 15  
37  
38 16 56 Michaelides MP, Zenger M, Koutsogiorgi C, *et al.* Personality correlates and gender  
39  
40 invariance of wording effects in the German version of the Rosenberg Self-Esteem Scale.  
41  
42 *Pers Individ Dif* 2016;**97**:13–8. doi:10.1016/J.PAID.2016.03.011  
43 18  
44  
45 19 57 Urbán R, Szigeti R, Kökönyei G, *et al.* Global self-esteem and method effects: Competing  
46  
47 factor structures, longitudinal invariance, and response styles in adolescents. *Behav Res*  
48  
49 *Methods* 2014;**46**:488–98. doi:10.3758/s13428-013-0391-5  
50 21  
51  
52 22 58 Mullen SP, Gothe NP, McAuley E. Evaluation of the factor structure of the Rosenberg Self-  
53  
54 Esteem Scale in older adults. *Pers Individ Dif* 2013;**54**:153–7.  
55 23  
56  
57 24 59 Marsh HW. Positive and negative global self-esteem: A substantively meaningful distinction  
58  
59 or artifactors? *J Pers Soc Psychol* 1996;**70**:810–9. doi:10.1037/0022-3514.70.4.810  
60

- 1  
2  
3 1 60 Catalonian Labor Relations and Quality of Work Department. *Segunda Encuesta Catalana*  
4  
5 2 *de Condiciones de Trabajo [Second Catalonian Survey of Working Conditions]*. Barcelona: :  
6  
7 Author 2012.  
8 3  
9  
10 4 61 Lobo A, Muñoz PE. Versiones en lengua española validadas. In: Goldberg D, Williams P,  
11  
12 5 eds. *Cuestionario de Salud General GHQ (General Health Questionnaire)*. Guia para el  
13  
14 6 usuario de las distintas versiones [Guide for the use of the different validated versions in  
15  
16 7 Spanish language]. Barcelona, Spain: : Editorial Masson 1996.  
17  
18  
19 8 62 Muthén LK, Muthén BO. *Mplus User's Guide*. 6th ed. Los Angeles, CA: : Muthén &  
20  
21 9 Muthén 2011.  
22  
23  
24 10 63 Browne MW. Asymptotic distribution free methods in the analysis of covariance structures.  
25  
26 11 *Br J Math Stat Psychol* 1984;**37**:62–83.  
27  
28 12 64 Wouters E, Booyens F le R, Ponnet K, *et al*. Wording Effects and the Factor Structure of the  
29  
30 13 Hospital Anxiety & Depression Scale in HIV/AIDS Patients on Antiretroviral  
31  
32 14 Treatment in South Africa. *PLoS One* 2012;**7**:1–7. doi:10.1371/journal.pone.0034881  
33  
34  
35 15 65 Bors DA, Vigneau FO, Lalande F. Measuring the Need for Cognition: Item polarity,  
36  
37 16 dimensionality, and the relation with ability. *Pers Individ Dif* 2006;**40**:819–28.  
38  
39  
40 17 66 Chen YH, Rendina-Gobioff G, Dedrick RF. Factorial Invariance of a Chinese Self-Esteem  
41  
42 18 Scale for Third and Sixth Grade Students: Evaluating Method Effects Associated with  
43  
44 19 Positively and Negatively Worded Items. *Int J Educ Psychol Assess* 2010;**6**:21–35.  
45  
46  
47 20 67 Corwyn RF. The factor structure of global self-esteem among adolescents and adults. *J Res*  
48  
49 21 *Pers* 2000;**34**:357–79.  
50  
51  
52 22 68 Rammstedt B, Goldberg LR, Borg I. The measurement equivalence of Big-Five factor  
53  
54 23 markers for persons with different levels of education. *J Res Pers* 2010;**44**:53–61.  
55  
56 24 69 Schmitt DP, Allik J. Simultaneous administration of the Rosenberg Self-Esteem Scale in 53  
57  
58 25 nations: Exploring the universal and culture-specific features of global self-esteem. *J Pers*  
59  
60

- 1  
2  
3 1        *Soc Psychol* 2005;**89**:623–42.  
4  
5 2 70      Podsakoff PM, MacKenzie SB, Podsakoff NP. Sources of method bias in social science  
6  
7 3        research and recommendations on how to control it. *Annu Rev Psychol* 2012;**63**:539–69.  
8  
9 4 71      Kamoen N, Holleman B, Mak P, *et al*. Agree or Disagree? Cognitive Processes in Answering  
10  
11 5        Contrastive Survey Questions. *Discourse Process* 2011;**48**:355–85.  
12  
13 6        doi:10.1080/0163853X.2011.578910  
14  
15 7  
16  
17  
18  
19  
20  
21  
22  
23  
24  
25  
26  
27  
28  
29  
30  
31  
32  
33  
34  
35  
36  
37  
38  
39  
40  
41  
42  
43  
44  
45  
46  
47  
48  
49  
50  
51  
52  
53  
54  
55  
56  
57  
58  
59  
60

1  
2  
3  
4  
5  
6  
7  
8  
9  
10  
11  
12  
13  
14  
15  
16  
17  
18  
19  
20  
21  
22  
23  
24  
25  
26  
27  
28  
29  
30  
31  
32  
33  
34  
35  
36  
37  
38  
39  
40  
41  
42  
43  
44  
45  
46  
47  
48  
49  
50  
51  
52  
53  
54  
55  
56  
57  
58  
59  
60

1  
2 →FILE Figure1.pdf

3  
4 *Figure 1.* Competing models tested for the 12–Item General Health Questionnaire. Underlined numbers identify negatively  
5 worded items. GPH: General Psychological Health factor; NW: Method factor associated with negatively worded items;  
6 PW: Method factor associated with positively worded items.



1  
2  
3 1  
4 2  
5 3 →FILE Figure2.pdf  
6  
7 4  
8  
9  
10 5  
11  
12 6  
13  
14 7  
15  
16 8  
17  
18 9  
19  
20 10  
21  
22 11  
23  
24 12  
25  
26 13  
27  
28 14  
29  
30 15  
31  
32 16  
33  
34 17  
35  
36 18  
37  
38 19  
39  
40  
41  
42  
43  
44  
45  
46  
47  
48  
49  
50  
51  
52  
53  
54  
55  
56  
57  
58  
59  
60

Figure 2. Bar charts of the response distributions for the 12-item General Health Questionnaire. Responses were given on a different 4-point response scale for the positively worded items (0 = better than usual, 1 = same as usual, 2 = less than usual, 3 = much less than usual) and for the negatively worded items (0 = not at all, 1 = no more than usual, 2 = more than usual, 3 = much more than usual).

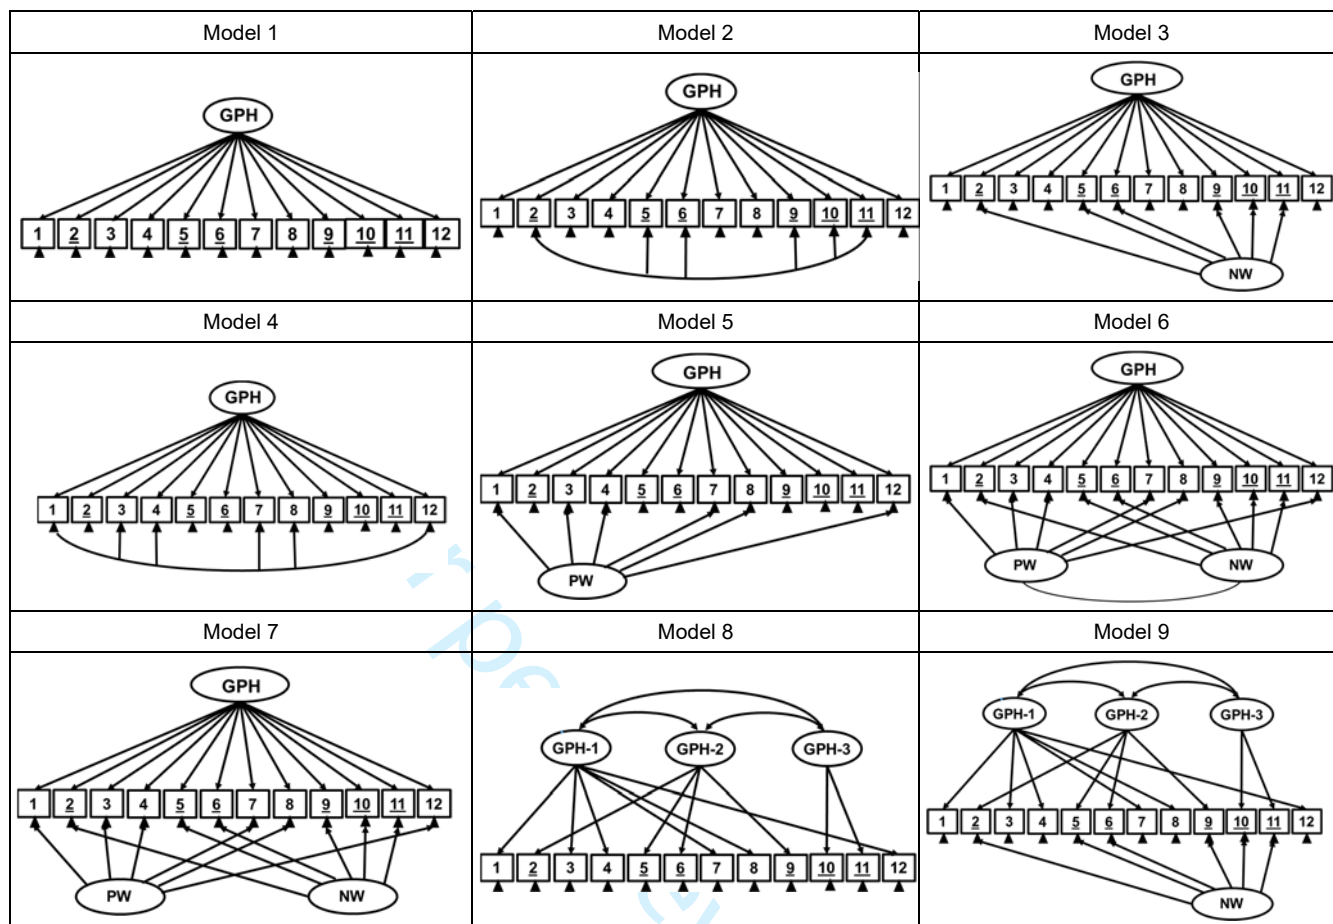

Figure 1. Competing models tested for the 12-Item General Health Questionnaire. Underlined numbers identify negatively worded items. GPH: General Psychological Health factor; GPH-1: Social dysfunction; GPH-2: Anxiety and depression; GPH-3: Loss of confidence; NW: Method factor associated with negatively worded items; PW: Method factor associated with positively worded items.

Positively worded items

Negatively worded items

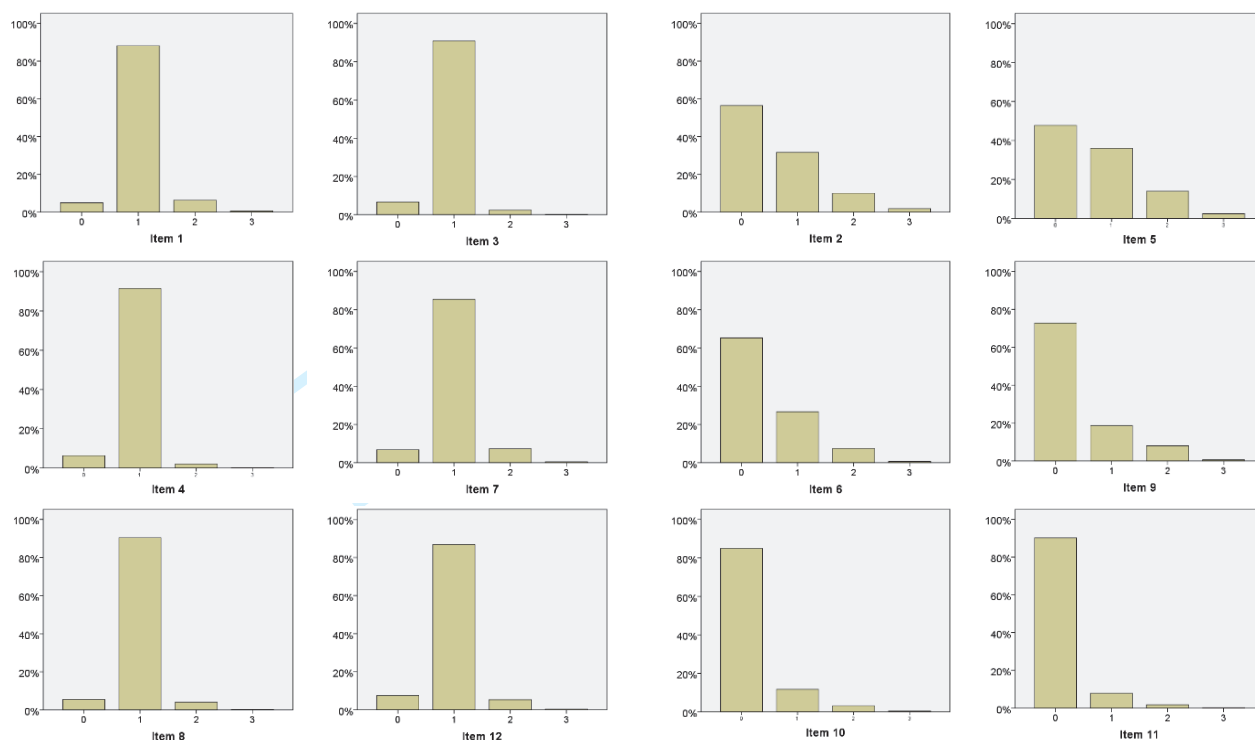

Figure 2. Bar charts of the response distributions for the 12-item General Health Questionnaire. Responses were given on a different 4-point response scale for the positively worded items (0 = better than usual, 1 = same as usual, 2 = less than usual, 3 = much less than usual) and for the negatively worded items (0 = not at all, 1 = no more than usual, 2 = more than usual, 3 = much more than usual).

1  
2  
3  
4  
5  
6  
7  
8  
9  
10  
11  
12  
13  
14  
15  
16  
17  
18  
19  
20  
21  
22  
23  
24  
25  
26  
27  
28  
29  
30  
31  
32  
33  
34  
35  
36  
37  
38  
39  
40  
41  
42  
43  
44  
45  
46  
47  
48  
49  
50  
51  
52  
53  
54  
55  
56  
57  
58  
59  
60STROBE Statement—Checklist of items that should be included in reports of *cross-sectional studies*

|                              | <b>Item No</b> | <b>Recommendation</b>                                                                                                                                                                                                                                 |
|------------------------------|----------------|-------------------------------------------------------------------------------------------------------------------------------------------------------------------------------------------------------------------------------------------------------|
| <b>Title and abstract</b>    | 1              | (a) Indicate the study's design with a commonly used term in the title or the abstract<br><b>P.1 Lines 1-4 (Title)</b>                                                                                                                                |
|                              |                | (b) Provide in the abstract an informative and balanced summary of what was done and what was found<br><b>P.3 Lines 1-18 (Abstract)</b>                                                                                                               |
| <b>Introduction</b>          |                |                                                                                                                                                                                                                                                       |
| Background/rationale         | 2              | Explain the scientific background and rationale for the investigation being reported<br><b>P.5 - P.8 (Introduction)</b>                                                                                                                               |
| Objectives                   | 3              | State specific objectives, including any prespecified hypotheses<br><b>P.8 Lines 5-9 (Introduction)</b>                                                                                                                                               |
| <b>Methods</b>               |                |                                                                                                                                                                                                                                                       |
| Study design                 | 4              | Present key elements of study design early in the paper<br><b>P.8 Lines 13-14 (Method - Participants)</b>                                                                                                                                             |
| Setting                      | 5              | Describe the setting, locations, and relevant dates, including periods of recruitment, exposure, follow-up, and data collection<br><b>P.8 Lines 15-16 (Method - Participants)</b>                                                                     |
| Participants                 | 6              | (a) Give the eligibility criteria, and the sources and methods of selection of participants<br><b>P.8 Lines 14-15 (Method - Participants)</b>                                                                                                         |
| Variables                    | 7              | Clearly define all outcomes, exposures, predictors, potential confounders, and effect modifiers. Give diagnostic criteria, if applicable<br><b>P.9 Lines 2-11 and P.11 Lines 1-5 (Method - Measures)</b>                                              |
| Data sources/<br>measurement | 8*             | For each variable of interest, give sources of data and details of methods of assessment (measurement). Describe comparability of assessment methods if there is more than one group<br><b>P.8 Lines 14-16 and P.9 Lines 2-11 (Method - Measures)</b> |
| Bias                         | 9              | Describe any efforts to address potential sources of bias<br><b>P.8 Line 14 (Method - Participants)</b>                                                                                                                                               |
| Study size                   | 10             | Explain how the study size was arrived at<br><b>P.8 Line 13 (Method - Participants)</b>                                                                                                                                                               |
| Quantitative variables       | 11             | Explain how quantitative variables were handled in the analyses. If applicable, describe which groupings were chosen and why<br><b>P.11 Lines 14-24 and P.12 Line 2 (Method – Statistical Analysis)</b>                                               |
| Statistical methods          | 12             | (a) Describe all statistical methods, including those used to control for confounding<br><b>P.11 Lines 7-24 (Method – Statistical Analysis)</b>                                                                                                       |
|                              |                | (b) Describe any methods used to examine subgroups and interactions<br><b>P.11 Line 25 and P.12 Lines 1-2 (Method – Statistical Analysis)</b>                                                                                                         |
|                              |                | (c) Explain how missing data were addressed<br><b>P.8 Lines 13-14 (Method – Participants). No missing data (personal interview)</b>                                                                                                                   |
|                              |                | (d) If applicable, describe analytical methods taking account of sampling strategy<br><b>P.8 Line 13 (Method – Participants)</b>                                                                                                                      |
|                              |                | (e) Describe any sensitivity analyses<br><b>P.11 Lines 14-24 (Method – Statistical Analysis)</b>                                                                                                                                                      |

**Results**

|                          |     |                                                                                                                                                                                                                                                                                                                                                                                                                                                                                                                                                                 |
|--------------------------|-----|-----------------------------------------------------------------------------------------------------------------------------------------------------------------------------------------------------------------------------------------------------------------------------------------------------------------------------------------------------------------------------------------------------------------------------------------------------------------------------------------------------------------------------------------------------------------|
| Participants             | 13* | (a) Report numbers of individuals at each stage of study—eg numbers potentially eligible, examined for eligibility, confirmed eligible, included in the study, completing follow-up, and analysed<br><a href="#">P.8 Lines 16-18 (Method – Participants)</a><br>(b) Give reasons for non-participation at each stage<br><a href="#">P.8 Line 13 (Method – Participants) Previous study cited (reference number 60)</a><br>(c) Consider use of a flow diagram<br><a href="#">P.8 Line 13 (Method – Participants) Previous study cited (reference number 60)</a>  |
| Descriptive data         | 14* | (a) Give characteristics of study participants (eg demographic, clinical, social) and information on exposures and potential confounders<br><a href="#">P.8 Table 1 (Method – Participants)</a><br>(b) Indicate number of participants with missing data for each variable of interest<br><a href="#">P.8 Lines 13-14 (Method – Participants). No missing data (personal interview)</a>                                                                                                                                                                         |
| Outcome data             | 15* | Report numbers of outcome events or summary measures<br><a href="#">P.9 Table 2 (Method - Measures) and P.12 Figure 2 (Method – Statistical Analysis)</a>                                                                                                                                                                                                                                                                                                                                                                                                       |
| Main results             | 16  | (a) Give unadjusted estimates and, if applicable, confounder-adjusted estimates and their precision (eg, 95% confidence interval). Make clear which confounders were adjusted for and why they were included<br><a href="#">P.9 Table 2 (Method - Measures) and P.12 Table 3 (Results)</a><br>(b) Report category boundaries when continuous variables were categorized<br><a href="#">Not applicable</a><br>(c) If relevant, consider translating estimates of relative risk into absolute risk for a meaningful time period<br><a href="#">Not applicable</a> |
| Other analyses           | 17  | Report other analyses done—eg analyses of subgroups and interactions, and sensitivity analyses<br><a href="#">P.13 Lines 4-14 (Results)</a>                                                                                                                                                                                                                                                                                                                                                                                                                     |
| <b>Discussion</b>        |     |                                                                                                                                                                                                                                                                                                                                                                                                                                                                                                                                                                 |
| Key results              | 18  | Summarise key results with reference to study objectives<br><a href="#">P.13 Lines 23-25 and P.14 Lines 1-14 (Discussion)</a>                                                                                                                                                                                                                                                                                                                                                                                                                                   |
| Limitations              | 19  | Discuss limitations of the study, taking into account sources of potential bias or imprecision. Discuss both direction and magnitude of any potential bias<br><a href="#">P.4 Lines 10-14 (Limitations) and P.15 Lines 20-21 (Discussion)</a>                                                                                                                                                                                                                                                                                                                   |
| Interpretation           | 20  | Give a cautious overall interpretation of results considering objectives, limitations, multiplicity of analyses, results from similar studies, and other relevant evidence<br><a href="#">P.14 Lines 21-25 and P.15 Lines 1-15 (Discussion)</a>                                                                                                                                                                                                                                                                                                                 |
| Generalisability         | 21  | Discuss the generalisability (external validity) of the study results<br><a href="#">P.15 Lines 16-20 (Discussion)</a>                                                                                                                                                                                                                                                                                                                                                                                                                                          |
| <b>Other information</b> |     |                                                                                                                                                                                                                                                                                                                                                                                                                                                                                                                                                                 |
| Funding                  | 22  | Give the source of funding and the role of the funders for the present study and, if applicable, for the original study on which the present article is based<br><a href="#">P.16 Lines 1-5 (Funding)</a>                                                                                                                                                                                                                                                                                                                                                       |

\*Give information separately for exposed and unexposed groups.

**Note:** An Explanation and Elaboration article discusses each checklist item and gives methodological background and published examples of transparent reporting. The STROBE checklist is best used in conjunction with this article (freely

1  
2  
3  
4  
5  
6  
7  
8  
9  
10  
11  
12  
13  
14  
15  
16  
17  
18  
19  
20  
21  
22  
23  
24  
25  
26  
27  
28  
29  
30  
31  
32  
33  
34  
35  
36  
37  
38  
39  
40  
41  
42  
43  
44  
45  
46  
47  
48  
49  
50  
51  
52  
53  
54  
55  
56  
57  
58  
59  
60

available on the Web sites of PLoS Medicine at <http://www.plosmedicine.org/>, Annals of Internal Medicine at <http://www.annals.org/>, and Epidemiology at <http://www.epidem.com/>). Information on the STROBE Initiative is available at [www.strobe-statement.org](http://www.strobe-statement.org).

For peer review only

# BMJ Open

## Method Effects Associated with Negatively and Positively Worded Items on the 12-Item General Health Questionnaire (GHQ-12): results from a cross-sectional survey with a representative sample of Catalanian workers

|                                 |                                                                                                                                                                                                                                                |
|---------------------------------|------------------------------------------------------------------------------------------------------------------------------------------------------------------------------------------------------------------------------------------------|
| Journal:                        | <i>BMJ Open</i>                                                                                                                                                                                                                                |
| Manuscript ID                   | bmjopen-2019-031859.R3                                                                                                                                                                                                                         |
| Article Type:                   | Original research                                                                                                                                                                                                                              |
| Date Submitted by the Author:   | 03-Oct-2019                                                                                                                                                                                                                                    |
| Complete List of Authors:       | Rodrigo, Maria F.; University of Valencia<br>Molina, J. Gabriel; University of Valencia<br>Losilla, Josep-Maria; Autonomous University of Barcelona<br>Vives, Jaume; Autonomous University of Barcelona<br>Tomás, José; University of Valencia |
| <b>Primary Subject Heading</b>: | Mental health                                                                                                                                                                                                                                  |
| Secondary Subject Heading:      | Research methods, Mental health                                                                                                                                                                                                                |
| Keywords:                       | psychological health, General Health Questionnaire (GHQ-12), method effects, item wording effects, confirmatory factor analysis                                                                                                                |
|                                 |                                                                                                                                                                                                                                                |

SCHOLARONE™  
Manuscripts

1  
2  
3  
4  
5  
6  
7  
8  
9  
10  
11  
12  
13  
14  
15  
16  
17  
18  
19  
20  
21  
22  
23  
24  
25  
26  
27  
28  
29  
30  
31  
32  
33  
34  
35  
36  
37  
38  
39  
40  
41  
42  
43  
44  
45  
46  
47  
48  
49  
50  
51  
52  
53  
54  
55  
56  
57  
58  
59  
60

1 **Title**

2 Method Effects Associated with Negatively and Positively Worded Items on the 12–Item General  
3 Health Questionnaire (GHQ–12): results from a cross-sectional survey with a representative  
4 sample of Catalanian workers

6 2. Authors and affiliation

7 Rodrigo, Maria F.  
8 Department of Methodology for the Behavioral Sciences  
9 University of Valencia  
10 Valencia (Spain)

12 Molina, J. Gabriel †  
13 Department of Methodology for the Behavioral Sciences  
14 University of Valencia  
15 Valencia (Spain)

17 Losilla, Josep-Maria  
18 Department of Psychobiology and Methodology of Health Sciences  
19 Universitat Autònoma de Barcelona  
20 Barcelona (Spain)

22 Vives, Jaume  
23 Department of Psychobiology and Methodology of Health Sciences  
24 Universitat Autònoma de Barcelona  
25 Barcelona (Spain)

27 Tomás, José M.  
28 Department of Methodology for the Behavioral Sciences  
29 University of Valencia  
30 Valencia (Spain)

32 †Deceased September 26, 2014

34 3. Word count, excluding title page, abstract, references, figures and tables: 3119

36 4. Authors' statements

37 All authors have agreed to authorship in the indicated order.

38 All authors declare that this paper is an original unpublished work and it is not being submitted  
39 elsewhere.

40 All authors do not have any financial interests that might be interpreted as influencing the research,  
41 and APA ethical standard were followed in the conduct of the study.



1  
2  
3  
4  
5  
6  
7  
8  
9  
10  
11  
12  
13  
14  
15  
16  
17  
18  
19  
20  
21  
22  
23  
24  
25  
26  
27  
28  
29  
30  
31  
32  
33  
34  
35  
36  
37  
38  
39  
40  
41  
42  
43  
44  
45  
46  
47  
48  
49  
50  
51  
52  
53  
54  
55  
56  
57  
58  
59  
60

1 5. Ethics statement.

2 The research was not submitted to approval by an institutional review board since this is not a  
3 requirement at our universities for this type of study.

4 Ethics approval was not sought for this study since this was a secondary analysis of anonymized  
5 data.

6

7 6. Data availability statement

8 Data is publicly available upon request to the Catalanian Labor Relations and Quality of Work  
9 Department.

10

11 7. Contact information for the corresponding author:

12 Jaume Vives

13 Department of Psychobiology and Methodology of Health Sciences

14 Universitat Autònoma de Barcelona

15 Edifici B - Despatx B5b/081

16 Carrer de la Fortuna / Carrer de Ca n'Altayó. Campus de la UAB

17 08193 Bellaterra (Cerdanyola del Vallès). Barcelona (Spain)

18 E-mail: jaume.vives@uab.cat

19 Phone: +34 93 581 23 31

## 1           2           3           4           5           6           7           8           9           10           11           12           13           14           15           16           17           18           19           20           21           22           23           24           25           26           27           28           29           30           31           32           33           34           35           36           37           38           39           40           41           42           43           44           45           46           47           48           49           50           51           52           53           54           55           56           57           58           59           60

### 1   **Abstract**

2   **Objective.** Recent studies into the factorial structure of the 12-item version of the General Health  
3   Questionnaire (GHQ-12) have shown that it was best represented by a single substantive factor  
4   when method effects associated with negatively worded (NW) items are considered. The purpose of  
5   the present study was to examine the presence of method effects, and their relationships with  
6   demographic covariates, associated with positively worded (PW) and/or NW items.

7   **Design.** A cross-sectional, observational study to compare a comprehensive set of confirmatory  
8   factor models, including method effects associated with PW and/or NW items with GHQ-12  
9   responses.

10   **Setting.** Representative sample of all employees living in Catalonia (Spain).

11   **Participants.** 3050 participants (44.6% women) who responded the Second Catalonian Survey of  
12   Working Conditions.

13   **Results.** A confirmatory factor analysis showed that the best-fitting model was a unidimensional  
14   model with two additional uncorrelated method factors associated with PW and NW items.  
15   Furthermore, structural equation modeling revealed that method effects were differentially related  
16   to both the sex and age of the respondents.

17   **Conclusion.** Individual differences related to sex and age can help to identify respondents who are  
18   prone to answering PW and NW items differently. Consequently, is desirable that both the  
19   constructs of interest as well as the effects of method factors are considered in SEM models as a  
20   means of avoiding the drawing of inaccurate conclusions about the relationships between the  
21   substantive factors.

### 22           23           24           25           26           27           28           29           30           31           32           33           34           35           36           37           38           39           40           41           42           43           44           45           46           47           48           49           50           51           52           53           54           55           56           57           58           59           60

### 24   **Keywords**

25   psychological health, General Health Questionnaire (GHQ-12), method effects, item wording

1  
2  
3 1 effects, confirmatory factor analysis  
4  
5  
6  
7  
8  
9  
10  
11  
12  
13  
14  
15  
16  
17  
18  
19  
20  
21  
22  
23  
24  
25  
26  
27  
28  
29  
30  
31  
32  
33  
34  
35  
36  
37  
38  
39  
40  
41  
42  
43  
44  
45  
46  
47  
48  
49  
50  
51  
52  
53  
54  
55  
56  
57  
58  
59  
60

1  
2  
3 1 **Strengths and limitations of this study**  
4

5 2

6  
7 3 Strengths

- 8 4 • Sampling quality: A random and large representative sample of workers and face-to-face  
9 5 administration by professional interviewers.  
10 6 • Comparison of confirmatory models for positively and/or negatively worded items and the  
11 7 use of two different parameterizations.  
12 8 • There are no previous studies regarding the demographic correlates of wording effects on  
13 9 the GHQ-12.  
14 10

15  
16  
17 11 Limitations

- 18 12 • The different response scale used for the NW items and the PW items in the questionnaire  
19 13 could be a confounding variable.  
20 14 • The results might not be generalized to other specific populations as, for example,  
21 15 adolescents and elderly retired people.  
22  
23  
24  
25  
26  
27  
28  
29  
30  
31  
32  
33  
34  
35  
36  
37  
38  
39  
40  
41  
42  
43  
44  
45  
46  
47  
48  
49  
50  
51  
52  
53  
54  
55  
56  
57  
58  
59  
60

## 1 Introduction

Originally developed by Goldberg[1], the General Health Questionnaire (GHQ) has been widely used as a screening instrument for measuring General Psychological Health (GPH) in both community and non-psychiatric clinical settings[2]. The shortest 12-item version (GHQ-12) is the most popular and has been employed on different settings and in several countries, as well as part of multiple major national health, social wellbeing and occupational surveys, achieving results which underline the fact that it is highly reliable and valid[3-11].

Despite its broad application, the factor structure underlying the responses to the GHQ-12 remains a controversial issue. In this sense, although the GHQ-12 was originally developed as a unidimensional scale, this one-factor latent structure has found little empirical support and some alternative multidimensional models have been proposed as more appropriate. Thus, the one with the most empirical support is the three-factor model proposed by Graetz[5,12-22]. It is important to note that the 6 positively worded (PW) items make up the first factor, whereas the other two factors are made up of the 6 negatively worded (NW) items (see Figure 1, Model 8). On the other hand, the bidimensional model, where the 6 NW and the 6 PW items in the GHQ-12 are grouped into two factors, has also obtained wide support, especially in studies based on exploratory factor analysis [5,10,23-28]. The arguments against these models and in favor of the unidimensional solution are the high correlations between the factors [13] and the low discriminant validity of the factor scores derived from these models[16,29,30].

As Hankins[31] points out, multifactor models may just be the resulting artifact of the inclusion of PW and NW items in the questionnaire and so, the controversy about the factorial structure of the GHQ-12 might relate to the effect of item wording on subjects' response patterns as part of a more general category called 'method'[32,33]. Hankins[31] found that, after modeling the wording effects for the NW items, the unidimensional model fitted better than both the two-factor model (NW vs. PW items) and Graetz's three-factor model. Other studies have called into question

1  
2  
3 1 the substantive meaning of the GHQ-12 multifactor solutions, suggesting that they might just be an  
4  
5 2 artifact due to the wording effects associated with NW items[29,30,34-40]. See Molina et al.[36]  
6  
7  
8 3 for a deeper review about the dimensionality of GHQ-12.

9  
10 4 Some studies about other instruments, however, suggested not only considering the wording  
11  
12 5 effects for the NW items but also for the PW items[41,42]. Regarding GHQ-12, only a recent meta-  
13  
14 6 analysis modelled the presence of method effects for negatively and positively worded items  
15  
16  
17 7 concluding that positively keyed items explained incremental variance beyond a general mental  
18  
19 8 health factor[43].

20  
21 9 Therefore, another source of variability in the results about the factor structure of the GHQ-  
22  
23 10 12 could come from the statistical control of method biases, that has been mainly achieved through  
24  
25  
26 11 the correlated traits-correlated methods (CTCM) and the correlated traits-correlated uniquenesses  
27  
28 12 (CTCU) confirmatory factor analysis models. Both procedures have been used in GHQ-12, to deal  
29  
30 13 with method effects applying the CTCM model [i.e., 30,44] the CTCU model [i.e., 29,31,39,40], or  
31  
32  
33 14 both CTCM and CTCU [i.e., 34-37].

34  
35 15 To date, we have not found any study about GHQ-12 that analyze the wording effects  
36  
37 16 associated with either PW items alone, nor with NW and PW items simultaneously, comparing both  
38  
39  
40 17 CTCU and CTCM models. There are several multivariate statistical models for analyzing method  
41  
42 18 effect, and among them the CFA based approaches are the most popular ones [45], in particular the  
43  
44 19 CFA with correlated traits and correlated methods (CFA-CTCM) and the CFA with correlated traits  
45  
46 20 and correlated uniqueness (CTCU). On one hand, the CTCM model specifies that indicators'  
47  
48  
49 21 variance can be explained by a linear combination of trait, method, and error effects [46], with trait  
50  
51 22 and method effects specified as latent variables. The CTCM model, when methods are specified  
52  
53  
54 23 independent (uncorrelated), directly translates into the well-known Bifactor model [47,48]. On the  
55  
56 24 other hand, the CTCU model specifies trait factors while method effects are modeled correlating the  
57  
58 25 uniqueness of items (indicators) sharing a common method [49]. Both CTCM and CTCU models  
59  
60

1  
2  
3 1 have strengths and shortcomings and therefore are usually employed simultaneously [50]. This  
4  
5 2 work extends the previous work by Molina et al. [36], which compares the fit of the unidimensional  
6  
7 3 model, the multifactor models and the CTCM and CTCU unidimensional models with method  
8  
9 4 effects for only the NW items.

10  
11  
12 5 To clarify, Figure 1 (Model 1 to Model 9) shows the 9 CFA models estimated to test the  
13  
14 6 potential method effects associated with either the PW or the NW, or both. Model 1 is a one factor  
15  
16 7 model of general health. This model also works as a baseline model against which to compare other  
17  
18 8 more complex models. Models 2 and 3 are the CTCU and CTCM models that include method  
19  
20 9 effects for the NW items. These were the best fitting models in Molina et al. [36]. Models 4 and 5  
21  
22 10 are the CTCU and CTCM models including method effects for the PW items. Model 6 is the CTCM  
23  
24 11 model including method factors for both the NW and PW items (a CTCU model with method  
25  
26 12 effects for both PW and NW items was not estimated because it is not identified). Model 7 is a  
27  
28 13 bifactor model with a general trait factor of general health and two method factors associated to NW  
29  
30 14 and PW items. The three factors are independent (uncorrelated). Additionally, and considering the  
31  
32 15 best fitting multidimensional model in Tomás, Gutiérrez and Sancho [51] based on the results by  
33  
34 16 Graetz [12], models 8 and 9 were also tested. Model 8 posited three substantive dimensions: social  
35  
36 17 dysfunction, anxiety and depression, and loss of confidence. Model 9 included an additional method  
37  
38 18 factor associated to NW items. Models considering a method factor associated to PW items made  
39  
40 19 no sense as all PW items were indicators of social dysfunction.

41  
42 20 As stressed by Marsh et al. [52], it becomes necessary to consider this comprehensive set of  
43  
44 21 competing models to determine the relative importance and substantive nature of the method  
45  
46 22 effects.

### 23 24 25 26 27 28 29 30 31 32 33 34 35 36 37 38 39 40 41 42 43 44 45 46 47 48 49 50 51 52 53 54 55 56 57 58 59 60

Figure 1

Finally, there has been some research carried out on the demographic correlates of method

1  
2  
3 1 effects, such as sex[53–57], age[55,58] or educational level[41,59]. With respect to the GHQ–12, to  
4  
5 2 date, we have not found any studies that analyze demographic correlates of method effects.  
6

7  
8 3 Building on the previous studies, the first aim of this study was to overcome the limitation  
9  
10 4 pointed out in Molina et al.[36] and examine method effects associated with both positive and  
11  
12 5 negative wording. The second aim was to further understand the meaning of the method factors;  
13  
14 6 therefore, we evaluated the relationships between the method factors and three covariates (i.e., the  
15  
16 7 sex, age, and educational level) in the framework of a structural equation model (SEM).  
17  
18  
19 8

## 21 9 **Method**

### 22 10 *Participants*

23  
24 11 The data used in this study came from the Second Catalonian Survey of Working Conditions[60]  
25  
26 12 and were based on a representative random sample of all employees living in Catalonia (Spain).  
27  
28 13 Data were collected between September and November 2010 by professional interviewers in private  
29  
30 14 households. The sample comprised a total of 3,050 participants who responded to the GHQ–12  
31  
32 15 included in the survey. Main sociodemographic characteristics of the sample are shown in Table 1.  
33  
34  
35 16

36  
37 16 Table 1. *Main sociodemographic characteristics.*

|                                          | M (SD)        | n (%)       | Range |
|------------------------------------------|---------------|-------------|-------|
| <i>Gender</i>                            |               |             |       |
| Women                                    |               | 1361 (44.6) |       |
| <i>Age</i>                               | 40.46 (11.19) |             | 17-82 |
| <i>Education</i>                         |               |             |       |
| Incomplete primary studies               |               | 90 (3.0)    |       |
| Primary studies                          |               | 541 (17.9)  |       |
| Secondary studies. 1 <sup>st</sup> stage |               | 637 (21.0)  |       |
| Associate degree                         |               | 763 (25.2)  |       |
| High School                              |               | 598 (19.8)  |       |
| Graduate studies                         |               | 359 (11.9)  |       |
| Postgraduate studies                     |               | 39 (1.3)    |       |



1  
2  
3 1 *Note.* *M* = Mean; *SD* = Standard Deviation  
4

5 2 *Public Involvement*  
6

7 3 Respondents were not involved in any stage of the design of the study and were only requested to  
8  
9  
10 4 respond the survey. In the selected households, interviewers identified themselves personally and  
11  
12 5 informed this was an official survey about the working conditions of employed Catalanian people  
13  
14 6 commissioned by the Catalanian Government Work Department.  
15

16 7 Results were published on the Catalanian Government Work Department website[60] and are  
17  
18 8 available at  
19

20  
21 9 [https://treball.gencat.cat/ca/ambits/seguretat\\_i\\_salut\\_laboral/publicacions/estadistiques\\_estudis/ci/ii](https://treball.gencat.cat/ca/ambits/seguretat_i_salut_laboral/publicacions/estadistiques_estudis/ci/ii)  
22  
23 10 [ecct/treballadors/](https://treball.gencat.cat/ca/ambits/seguretat_i_salut_laboral/publicacions/estadistiques_estudis/ci/ii)  
24

25  
26 11 *Measures*  
27

28 12 The GHQ–12 is a self–report scale that contains 6 PW items (e.g. “Have you been able to face up to  
29  
30 13 problems?”) and 6 NW items (e.g. “Have you been losing confidence in yourself?”). The GHQ–12  
31  
32 14 was validated in Spain by Lobo and Muñoz[61]. Table 2 shows the statements of these items in the  
33  
34 15 same order as they were presented in the survey. It must be noted that the GHQ–12 has a different  
35  
36 16 response scale for the PW items (i.e.: *more than usual*; *same as usual*; *less than usual*; and *much*  
37  
38 17 *less than usual*) and the NW items (i.e.: *not at all*; *no more than usual*; *rather more than usual*; and  
39  
40 18 *much more than usual*). Accordingly, the 4–point scoring scheme was applied in our study so total  
41  
42 19 scores in the GHQ–12 ranged from 0 to a maximum of 36, with higher scores indicating lower  
43  
44 20 levels of GPH.  
45  
46  
47

48 21 Table 2. *Descriptive statistics, standardized factor loadings from Model 7 and correlations between the*  
49  
50 22 *Model 7 factors and the covariates*  
51

| <i>Item</i>                   | <i>M</i> | <i>SD</i> | Model 7    |           |           |
|-------------------------------|----------|-----------|------------|-----------|-----------|
|                               |          |           | <i>GPH</i> | <i>PW</i> | <i>NW</i> |
| Item 1. Able to concentrate   | 1.03     | 0.37      | .42*       | .49*      |           |
| Item 2. Lost sleep over worry | 0.57     | 0.75      | .78*       |           | .07       |

1  
2  
3  
4  
5  
6  
7  
8  
9  
10  
11  
12  
13  
14  
15  
16  
17  
18  
19  
20  
21  
22  
23  
24  
25  
26  
27  
28  
29  
30  
31  
32  
33  
34  
35  
36  
37  
38  
39  
40  
41  
42  
43  
44  
45  
46  
47  
48  
49  
50  
51  
52  
53  
54  
55  
56  
57  
58  
59  
60

|                                                     |      |      |      |      |
|-----------------------------------------------------|------|------|------|------|
| Item 3. Playing a useful part in things             | 0.96 | 0.31 | .09* | .59* |
| Item 4. Capable of making decisions                 | 0.96 | 0.30 | .14* | .70* |
| Item 5. Constantly under strain                     | 0.71 | 0.79 | .83* | .03  |
| Item 6. Could not overcome difficulties             | 0.44 | 0.66 | .76* | .25* |
| Item 7. Enjoy day-to-day activities                 | 1.01 | 0.40 | .53* | .55* |
| Item 8. Face up to problems                         | 0.99 | 0.32 | .39* | .60* |
| Item 9. Feeling unhappy and depressed               | 0.37 | 0.66 | .78* | .38* |
| Item 10. Losing confidence in yourself              | 0.19 | 0.48 | .53* | .70* |
| Item 11. Thinking of yourself as a worthless person | 0.12 | 0.40 | .48* | .72* |
| Item 12. Feeling reasonably happy                   | 0.99 | 0.38 | .44* | .72* |

---

Relations between the Model 7 factors and the socio-demographic variables

---

|                   |  |  |      |       |      |
|-------------------|--|--|------|-------|------|
| Sex               |  |  | .13* | -.08* | -.02 |
| Age               |  |  | .11* | .08*  | .01  |
| Educational level |  |  | .00  | -.02  | -.06 |

---

1 *Note.* *M* = Mean; *SD* = Standard Deviation; *GPH* = General Health Psychology factor; *PW* = Positive Wording factor;

2 *NW* = Negative Wording factor. \**p* < .05

1  
2  
3 1 For the purposes of exploring the correlates of method effects (i.e., item wording effects),  
4  
5 2 we used the following three covariates: (a) sex (0= men and 1= women); (b) age; and (c)  
6  
7 3 educational level, which was measured as a self-reported question with 7 response graduated  
8  
9 4 categories ranging from *incomplete primary studies* to *postgraduate studies*. The educational level  
10  
11 5 was scored as the highest level of education reached.  
12  
13  
14  
15 6

### 17 7 *Statistical Analysis*

18  
19 8 A set of competing confirmatory factor models were estimated using MPlus 8.3[62]. Figure 1  
20  
21 9 shows the specification of all these CFA models. The goodness-of-fit indices computed were: the  
22  
23 10 chi-square statistic; the Comparative Fit Index (CFI); the Root Mean Square Error of  
24  
25 11 Approximation (RMSEA) with its 90% confidence interval; and the Standardized Root Mean  
26  
27 12 Square Residual (SRMR). Values greater than 0.95 for CFI and TLI, and lower than 0.06 and 0.08  
28  
29 13 for RMSEA and SRMR, respectively, are considered to indicate good model fit.  
30  
31  
32

33 14 As concerns the estimation of CFA models, most studies into the GHQ-12 factor structure  
34  
35 15 have used maximum likelihood[16,31,35,40,44]. This estimation method relies on several  
36  
37 16 assumptions which should be met to be confident about the results obtained. This is the case of the  
38  
39 17 assumption of multivariate normality which implies, first, that the variables are continuous in nature  
40  
41 18 and, second, that the joint distribution of the variables is normal. The first condition is unlikely to  
42  
43 19 be met with the GHQ-12 Likert-type response data; nor is the second if the variables depart  
44  
45 20 markedly from normality as is the case for the responses to the NW items which were heavily  
46  
47 21 positively skewed (see Figure 2). An alternative when these conditions are not met is to use the  
48  
49 22 weighted least squares (WLS) estimator [63], which has already been used in some studies about  
50  
51 23 the GHQ-12 factor structure[13,18,20,29] and it will be the estimation method used here. Thus, the  
52  
53 24 various CFA models were estimated using Diagonally WLS.  
54  
55  
56  
57

58 25 Finally, correlates of the GHQ-12 factors were evaluated using SEM through the inclusion  
59  
60

1  
2  
3  
4  
5  
6  
7  
8  
9  
10  
11  
12  
13  
14  
15  
16  
17  
18  
19  
20  
21  
22  
23  
24  
25  
26  
27  
28  
29  
30  
31  
32  
33  
34  
35  
36  
37  
38  
39  
40  
41  
42  
43  
44  
45  
46  
47  
48  
49  
50  
51  
52  
53  
54  
55  
56  
57  
58  
59  
60

1 in the finally selected model of the 3 covariates considered in this study: sex was treated as  
2 categorical, whereas age and educational level were treated as continuous variables.

## Figure 2

### Results

The goodness-of-fit statistics and indices obtained for the 9 models compared here are shown in Table 3.

Table 3. *Fit indexes for the alternative models of the 12-item General Health Questionnaire*

| <i>Models</i>  | <i>df</i> | <i>Chi-</i> | <i>CFI</i> | <i>RMSEA [90% CI]</i> | <i>SRMR</i> |
|----------------|-----------|-------------|------------|-----------------------|-------------|
| <i>Model 1</i> | 54        | 5378.68     | .77        | .180 [.176, .184]     | .119        |
| <i>Model 2</i> | 39        | 928.099     | .96        | .086 [.082, .091]     | .049        |
| <i>Model 3</i> | 48        | 1345.38     | .95        | .094 [.090, .059]     | .061        |
| <i>Model 4</i> | 39        | 934.690     | .96        | .087 [.083, .092]     | .052        |
| <i>Model 5</i> | 48        | 1275.28     | .95        | .092 [.087, .096]     | .058        |
| <i>Model 6</i> | 41        | 497.520     | .98        | .060 [.056, .065]     | .030        |
| <i>Model 7</i> | 42        | 507.741     | .98        | .060 [.056, .065]     | .030        |
| <i>Model 8</i> | 51        | 1142.88     | .95        | .084 [.080, .088]     | .054        |
| <i>Model 9</i> | 45        | 960.388     | .96        | .082 [.078, .086]     | .049        |

Notes: Models are specified in Figure 1; CFI = Comparative Fit Index; RMSEA = Root Mean Square Error of Approximation; CI = Confidence Interval; SRMR = Standardized Root Mean Square Residual.

Model 1, with a single factor of general health, and model 8, with three substantive factors, had worse fit than the models that include wording effects. That is, a careful look at fit indexes makes clear that the inclusion of method effects always improves model fit. Indeed, both NW and PW method effects are needed to get the best fitting models. These best fitting models were models 6 and 7. Their fit was practically indistinguishable and, given that they only differ in that model 7 is more parsimonious because constrains method factors correlation to zero, it will be retained as the best representation of the observed data.

1  
2  
3 1 An in-depth inspection of the parameter estimates in Model 7 (see Table 2) showed that all  
4  
5 2 factor loadings were statistically significant for the three factors, except for items 2 and 5 in the  
6  
7 3 method factor comprising the NW items.  
8  
9

10 4 Finally, a statistical analysis of the relationships between the latent factors in Model 7 and  
11  
12 5 the 3 covariates considered in this study (i.e. sex, age and educational level) was performed through  
13  
14 6 a MIMIC SEM model in which the effects between the 3 latent factors in Model 7 and the 3  
15  
16 7 covariates were freely estimated, the focus being on the relationships between the method factors  
17  
18 8 and the covariates. The model fit was excellent (RMSEA = .040; RMSEA 90% IC = [.037, .049];  
19  
20 9 CFI = .99; SRMR = .029). As can be seen in Table 2, the relations of age with the method factors  
21  
22 10 were near to 0 and statistically non-significant for NW items, and positive and significant although  
23  
24 11 small with PW items (.08). Sex was significantly related with the method factor associated with PW  
25  
26 12 items (−.08), whereas the educational level was not significantly related to method factors. Thus,  
27  
28 13 men and women differ in the way they answer PW items, meaning that men are slightly more likely  
29  
30 14 than women to endorse PW items, and method effects associated to PW items also increased by age.  
31  
32  
33  
34  
35  
36  
37  
38

## 39 16 **Discussion**

40 17 This study focused on the examination of the latent structure underlying the responses to the GHQ–  
41  
42 18 12, considering the role of method effects associated with both, positive and negative items  
43  
44 19 wording, and using two alternative parameterizations of the CFA measurement models. What  
45  
46 20 should first be noted is that the studies that have included method effects in the measurement model  
47  
48 21 of the GHQ–12 have been more the exception than the rule in previous research into the factor  
49  
50 22 structure of this questionnaire.  
51  
52  
53

54 23 According to the results of the present study, we conclude that the GHQ–12 factor structure  
55  
56 24 is best characterized by introducing latent method factors that capture both the method effects  
57  
58 25 associated with NW and PW items (Model 7). These results support the conclusion from previous  
59  
60

1  
2  
3 1 research that the good fit obtained by multidimensional models (mainly the two-factor model and  
4  
5 2 the three-factor Graetz's model) could simply be explained by the artificial grouping of PW and  
6  
7 3 NW items. However, the interpretation of the latent (method) factors as purely integrating method  
8  
9 4 bias due to wording is not straightforward. It is obvious that NW and PW items share the wording.  
10  
11  
12 5 It is also clear that this three bifactor model (one trait and two method factors) fitted the data best.  
13  
14 6 And finally, there is a lot of empirical evidence on these wording effects. However, it is also  
15  
16 7 relevant to discuss the large loadings of many items on the method factors, being these loadings  
17  
18 8 sometimes larger than their loadings in the trait factor. The general factor explains a 52% of the  
19  
20 9 shared variance, but there are some items that deserve careful attention. For example, items 3  
21  
22 10 ("playing useful part in things") and 4 ("capable of making decisions") had very low loadings on  
23  
24 11 the trait factor. If we understand PW method factor as only method bias, then it follows that these  
25  
26 12 two items are purely method effects, but surely they must share some trait variance. In the same  
27  
28 13 vein, items 10 ("losing confidence in yourself") and 11 ("thinking of yourself as a worthless  
29  
30 14 person") load very high in the NW method factor and, as a reviewer pointed out, a likely (post-hoc)  
31  
32 15 explanation is that wording bias are still confounded with a confidence/self-image factor. Therefore,  
33  
34 16 the interpretation of these effects as purely method may be compromised and, accordingly, the  
35  
36 17 interpretation of an overall score for the scale difficult.  
37  
38  
39

40  
41  
42 18 The second aim of this study was to examine the relationships between the method factors  
43  
44 19 associated with both NW and PW items and three demographic variables, namely, the sex, age and  
45  
46 20 educational level of the respondents. Regarding the sex, we found a statistically significant, but  
47  
48 21 weak, relationship between PW and sex, so that men were more likely than women to endorse PW  
49  
50 22 items. These results are in line with previous works that, in the context of RSES, have found sex  
51  
52 23 differences in wording effects[56,57]. As for the explanatory role of age on method effects, we  
53  
54 24 found that the relationship between age and the negative wording effect was not statistically  
55  
56 25 significant, which supports previous research using other questionnaires (e.g., self-esteem  
57  
58  
59  
60

1  
2  
3 1 scales,[50]; Hospital Anxiety & Depression Scale,[64]). Moreover, our results give support to  
4  
5 2 previous studies which had stated that, in older adults, the strongest method effects would be  
6  
7 3 associated with PW items, rather than NW items[55,58].  
8  
9

10 4 As to the educational level, we found that there was not a significant correlation of this  
11  
12 5 variable on the two method factors. This result supports and extends the evidence obtained in  
13  
14 6 Tomás et al.[50], that found that the educational level of the respondents had no effect on the  
15  
16 7 negative method factor using self-esteem questionnaires. This results contradicts previous research  
17  
18 8 on the relationship of the negative wording factor and the educational level/verbal ability with  
19  
20 9 different questionnaires and samples[41,64–69].  
21  
22  
23

24 10 Overall, the significant effects of sex and age on trait and method factors point out that  
25  
26 11 women have a worse wellbeing, but this effect is partly modified by a method effect on the  
27  
28 12 positively worded items, whereas the results for age suggest that older respondents have worse  
29  
30 13 well-being and this effect is magnified by a method effect on the positive wording factor. The  
31  
32 14 results on the individual differences related to the demographic variables considered in this study  
33  
34 15 cannot only help to understand the presence of wording method effects but also to identify  
35  
36 16 respondents who are prone to answering PW and NW items differently. In this sense, the  
37  
38 17 relationship that appears as more evident is for the age and sex variables.  
39  
40  
41

42 18 Another practical consequence of our study concerns the relationship between the intended  
43  
44 19 measure of the GHQ–12 (i.e., the GPH factor) and other constructs of interest. Several studies have  
45  
46 20 shown that method effects can inflate, deflate or have no effect at all on estimates of the relationship  
47  
48 21 between two constructs (see Podsakoff[70], for a further review of the effects that method biases  
49  
50 22 have on individual measures and on the covariation between different constructs). Thus, it is  
51  
52 23 desirable that both the constructs of interest as well as the effects of method factors, like positive  
53  
54 24 and negative wording, are considered in SEM models as a means of controlling these systematic  
55  
56 25 sources of bias and, thus, avoiding the drawing of inaccurate conclusions about the relationships  
57  
58  
59  
60

1  
2  
3 1 between the substantive factors.  
4

5 2 Previous research on the GHQ-12 (e.g.[31,36]) has outlined the asymmetry in the  
6  
7 3 participants' responses as a function of the wording of the items, as well as the different responses  
8  
9 4 scales for the positive and negative items. This asymmetry in the participants' responses as a  
10  
11 5 function of the wording of the items is consistent with results from previous research into wording  
12  
13 6 effects for contrastive survey questions[71]. The extent to which the presence of method effects is  
14  
15 7 linked to the asymmetric pattern of responses and/or to the different response scales for the PW and  
16  
17 8 NW items in the GHQ-12 should be examined in future research.  
18  
19  
20

21 9 Comparing the current work with previous studies into the factorial structure of the GHQ-  
22  
23 10 12, to our knowledge, this is the first study that, on the one hand, tests a comprehensive set of  
24  
25 11 models including method effects associated with both PW and NW items and also explores some  
26  
27 12 demographic correlates of these method effects. Another strength of this work was the fact that it  
28  
29 13 used a large representative sample of workers, but the results might not be generalized to other  
30  
31 14 specific populations, for example, adolescents and elderly retired people.  
32  
33  
34  
35  
36  
37  
38  
39  
40  
41  
42  
43  
44  
45  
46  
47  
48  
49  
50  
51  
52  
53  
54  
55  
56  
57  
58  
59  
60



1  
2  
3 **1 Funding**  
4 2

5 3 This work was supported by the Grant PGC2018-100675-B-I00, Spanish Ministry of  
6 4 Science, Innovation and Universities (Spain). The funders had no role in the study design, data  
7 5 collection and analysis, decision to publish, or preparation of the manuscript.  
8 6  
9 6

10 6  
11 **7 Competing interests**

12 8 No conflict of interest has been declared by the authors.  
13 9  
14 9

15 **10 Contributorship Statement**

16 11 All authors meet the criteria recommended by the International Committee of Medical Journal  
17 12 Editors, ICMJE. All authors made substantial contributions to conception and design, acquisition of  
18 13 data, or analysis and interpretation of data. MFR and GM: drafted the article. JV and JML: critically  
19 14 revised the draft for important intellectual content. JMT worked in the statistical analysis and  
20 15 interpretation of data. All authors agreed on the final version.  
21  
22  
23  
24  
25  
26  
27  
28  
29  
30  
31  
32  
33  
34  
35  
36  
37  
38  
39  
40  
41  
42  
43  
44  
45  
46  
47  
48  
49  
50  
51  
52  
53  
54  
55  
56  
57  
58  
59  
60

## References

- 1 Goldberg DP. *The detection of psychiatric illness by questionnaire*. London: : Oxford University Press 1972.
- 2 Goldberg DP, Williams P. *A user's guide to the General Health Questionnaire*. Windsor, United Kingdom: : NFER-Nelson 1988.
- 3 Bhui K, Bhugra D, Goldberg D. Cross-cultural validity of the Amritsar Depression Inventory and the General Health Questionnaire amongst English and Punjabi primary care attenders. *Soc Psychiatry Psychiatr Epidemiol* 2000;**35**:248–54.
- 4 Daradkeh TK, Ghubash R, El-Rufaie O. Reliability, validity, and factor structure of the Arabic version of the 12-item General Health Questionnaire. *Psychol Rep* 2001;**89**:85–94.
- 5 Gelaye B, Tadesse MG, Lohsoonthorn V, *et al*. Psychometric properties and factor structure of the General Health Questionnaire as a screening tool for anxiety and depressive symptoms in a multi-national study of young adults. *J Affect Disord* 2015;**187**:197–202. doi:10.1016/J.JAD.2015.08.045
- 6 Goldberg DP, Gater R, Sartorius N, *et al*. The validity of two versions of the GHQ in the WHO study of mental illness in general health care. *Psychol Med* 1997;**27**:191–7.
- 7 Lundin A, Hallgren M, Theobald H, *et al*. Validity of the 12-item version of the General Health Questionnaire in detecting depression in the general population. *Public Health* 2016;**136**:66–74. doi:10.1016/J.PUHE.2016.03.005
- 8 Rocha K, Pérez K, Rodríguez-Sanz M, *et al*. Propiedades psicométricas y valores normativos del General Health Questionnaire (GHQ-12) en población general española. *Int J Clin Heal Psychol* 2011;**11**:125–39.
- 9 Sanchez-Lopez MP, Dresch V. The 12-item General Health Questionnaire (GHQ-12): Reliability, external validity and factor structure in the Spanish population. *Psicothema* 2008;**20**:839–43.

- 1  
2  
3 1 10 Schmitz N, Kruse J, Tress W. Psychometric properties of the General Health Questionnaire  
4  
5 2 (GHQ-12) in a German primary care sample. *Acta Psychiatr Scand* 1999;**100**:462–8.  
6  
7 3 11 Tait RJ, French DJ, Hulse GK. Validity and psychometric properties of the General Health  
8  
9 Questionnaire-12 in young Australian adolescents. *Aust N Z J Psychiatry* 2003;**37**:374–81.  
10 4  
11 5 12 Graetz B. Multidimensional properties of the General Health Questionnaire. *Soc Psychiatry*  
12  
13 *Psychiatr Epidemiol* 1991;**26**:132–8.  
14 6  
15 7 13 Campbell A, Knowles S. A confirmatory factor analysis of the GHQ12 using a large  
16  
17 8 Australian sample. In: *European Journal of Psychological Assessment*. 2007. 2–8.  
18  
19 9 14 Cheung YB. A confirmatory factor analysis of the 12-item General Health Questionnaire  
20  
21 10 among older people. *Int J Geriatr Psychiatry* 2002;**17**:739–44.  
22  
23 11 15 French DJ, Tait RJ. Measurement invariance in the General Health Questionnaire-12 in  
24  
25 12 young Australian adolescents. *Eur Child Adolesc Psychiatry* 2004;**13**:1–7.  
26  
27 13 16 Gao F, Luo N, Thumboo J, *et al*. Does the 12-item General Health Questionnaire contain  
28  
29 14 multiple factors and do we need them? *Health Qual Life Outcomes* 2004;**2**:1–7.  
30  
31 15 doi:10.1186/1477-7525-2-63  
32  
33 16 17 Mäkikangas A, Feldt T, Kinnunen U, *et al*. The factor structure and factorial invariance of  
34  
35 18 the 12-item General Health Questionnaire (GHQ-12) across time: Evidence from two  
36  
37 19 community-based samples. *Psychol Assess* 2006;**18**:444–51.  
38  
39 20 18 Padrón A, Galán I, Durbán M, *et al*. Confirmatory factor analysis of the General Health  
40  
41 21 Questionnaire (GHQ-12) in Spanish adolescents. *Qual Life Res* 2012;**21**:1291–8.  
42  
43 22 19 Penninkilampi-Kerola V, Miettunen J, Ebeling H. Health and disability: A comparative  
44  
45 23 assessment of the factor structures and psychometric properties of the GHQ-12 and the  
46  
47 24 GHQ-20 based on data from a Finnish population-based sample. *Scand J Psychol*  
48  
49 2006;**47**:431–40.  
50  
51 25 20 Shevlin M, Adamson G. Alternative factor models and factorial invariance of the GHQ-12: A  
52  
53  
54  
55  
56  
57  
58  
59  
60

- 1  
2  
3 1 large sample analysis using confirmatory factor analysis. *Psychol Assess* 2005;**17**:231–6.  
4  
5 2 21 Martin CR, Newell RJ. The factor structure of the 12-item General Health Questionnaire in  
6  
7 individuals with facial disfigurement. *J Psychosom Res* 2005;**59**:193–9.  
8 3  
9  
10 4 doi:10.1016/j.jpsychores.2005.02.020  
11  
12 5 22 Tomás JM, Meléndez JC, Oliver A, *et al*. Efectos de método en las escalas de Ryff: Un  
13  
14 estudio en población de personas mayores. *Psicológica* 2010;**31**:383–400.  
15 6  
16  
17 7 23 Andrich D, Van Schoubroeck L. The General Health Questionnaire: a psychometric analysis  
18  
19 using latent trait theory. *Psychol Med* 1989;**19**:469–85.  
20 8  
21 9 24 Gao W, Stark D, Bennett MI, *et al*. Using the 12-item General Health Questionnaire to  
22  
23 screen psychological distress from survivorship to end-of-life care: Dimensionality and item  
24 10  
25 quality. *Psychooncology* 2012;**21**:954–61.  
26 11  
27  
28 12 25 Glozah FN, Pevalin DJ. Factor structure and psychometric properties of the General Health  
29  
30 Questionnaire (GHQ-12) among Ghanaian adolescents. *J Child Adolesc Ment Heal*  
31 13  
32 2015;**27**:53–7. doi:10.2989/17280583.2015.1007867  
33 14  
34  
35 15 26 Kilic C, Rezaki M, Rezaki B, *et al*. General Health Questionnaire (GHQ-12 & GHQ-28):  
36  
37 Psychometric properties and factor structure of the scales in a Turkish primary care sample.  
38 16  
39 *Soc Psychiatry Psychiatr Epidemiol* 1997;**32**:327.  
40 17  
41  
42 18 27 Picardi A, Abeni D, Pasquini P. Assessing psychological distress in patients with skin  
43  
44 diseases: Reliability, validity and factor structure of the GHQ-12. *Eur Acad Dermatology*  
45 19  
46 *Venereol* 2001;**15**:410.  
47 20  
48  
49 21 28 Werneke U, Goldberg DP, Yalcin I, *et al*. The stability of the factor structure of the General  
50  
51 Health Questionnaire. *Psychol Med* 2000;**30**:823.  
52 22  
53  
54 23 29 Aguado J, Campbell A, Ascaso C, *et al*. Examining the factor structure and discriminant  
55  
56 validity of the 12-item General Health Questionnaire (GHQ-12) among Spanish post-partum  
57  
58 women. *Assessment* 2012;**19**:517–25.  
59 25  
60

- 1  
2  
3 1 30 Ye S. Factor structure of the General Health Questionnaire (GHQ-12): The role of wording  
4 effects. *Pers Individ Dif* 2009;**46**:197–201.  
5  
6 2  
7  
8 3 31 Hankins M. The factor structure of the twelve item General Health Questionnaire (GHQ-12):  
9 the result of negative phrasing? *Clin Pract Epidemiol Ment Heal* 2008;**4**:10.  
10  
11 4  
12 5 32 Harvey RJ, Billings RS, Nilan KJ. Confirmatory factor analysis of the Job Diagnostic  
13 Survey: Good news and bad news. *J Appl Psychol* 1985;**70**:461–8.  
14  
15 6  
16  
17 7 33 Smith N, Stults DM. Factors defined by negatively keyed items: The results of careless  
18 respondents? *Appl Psychol Meas* 1985;**9**:367–73.  
19  
20 8  
21 9 34 Abubakar A, Fischer R. The factor structure of the 12-item General Health Questionnaire in a  
22 literate Kenyan population. *Stress Heal J Int Soc Investig Stress* 2012;**28**:248–54.  
23  
24 10  
25  
26 11 35 Fernandes HM, Vasconcelos-Raposo J. Factorial validity and invariance of the GHQ-12  
27 among clinical and nonclinical samples. *Assessment* 2013;**20**:219–29.  
28  
29 12  
30  
31 13 doi:<http://dx.doi.org/10.1177/1073191112465768>  
32  
33 14 36 Molina JG, Rodrigo MF, Losilla J-M, *et al.* Wording effects and the factor structure of the  
34 12-item General Health Questionnaire (GHQ-12). *Psychol Assess* 2014;**26**:1031–1037.  
35  
36 15  
37 16 doi:10.1037/a0036472  
38  
39  
40 17 37 Motamed N, Edalatian Zakeri S, Rabiee B, *et al.* The Factor Structure of the Twelve Items  
41 General Health Questionnaire (GHQ-12): a Population Based Study. *Appl Res Qual Life*  
42 2018;**13**:303–16. doi:10.1007/s11482-017-9522-y  
43  
44 19  
45  
46 20 38 Rey JJ, Abad FJ, Barrada JR, *et al.* The impact of ambiguous response categories on the  
47 factor structure of the GHQ–12. *Psychol Assess* 2014;**26**:1021–30. doi:10.1037/a0036468  
48  
49 21  
50  
51 22 39 Romppel M, Braehler E, Roth M, *et al.* What is the General Health Questionnaire-12  
52 assessing? *Compr Psychiatry* 2013;**54**:406–13. doi:10.1016/j.comppsy.2012.10.010  
53  
54 23  
55  
56 24 40 Smith AB, Oluboyede Y, West R, *et al.* The factor structure of the GHQ-12: The interaction  
57 between item phrasing, variance and levels of distress. *Qual Life Res An Int J Qual Life Asp*  
58  
59 25  
60

- 1  
2  
3 1 *Treat Care Rehabil* 2013;**22**:145–52.  
4  
5 2 41 Marsh HW. Negative item bias in ratings scales for preadolescent children: A cognitive-  
6  
7 developmental phenomenon. *Dev Psychol* 1986;**22**:37–49.  
8 3  
9  
10 4 42 Tomás JM, Oliver A. Rosenberg’s Self-Esteem Scale: Two factors or method effects. *Struct*  
11  
12 5  
13 *Equ Model A Multidiscip J* 1999;**6**:84–98.  
14  
15 6 43 Gnambs T, Staufenbiel T. The structure of the General Health Questionnaire (GHQ-12): two  
16  
17 7 meta-analytic factor analyses. *Health Psychol Rev* 2018;**12**:179–94.  
18  
19 8 doi:10.1080/17437199.2018.1426484  
20  
21 9 44 Wang L, Lin W. Wording effects and the dimensionality of the General Health Questionnaire  
22  
23 (GHQ-12). *Pers Individ Dif* 2011;**50**:1056–61.  
24 10  
25  
26 11 45 Wothke W. Models for multitrait-multimethod matrix analysis. In: Marcoulides GA,  
27  
28 12 Schumacker RE, eds. *Advanced Structural Equation Modeling: Issues and Techniques*.  
29  
30 Mahwah, NJ: : Lawrence Erlbaum Associates 1996.  
31 13  
32  
33 14 46 Jöreskog KG. Analyzing psychological data by structural analysis of covariance matrices. In:  
34  
35 15 Atkinson RC, Krantz DH, Luce RD, *et al.*, eds. *Contemporary developments in mathematical*  
36  
37 16 *psychology. Vol. 2*. San Francisco: : Freeman 1974. 1–56.  
38  
39  
40 17 47 Markon KE. Bifactor and Hierarchical Models: Specification, Inference, and Interpretation.  
41  
42 18 *Annu Rev Clin Psychol* 2019;**15**:51–69. doi:10.1146/annurev-clinpsy-050718-095522  
43  
44 19 48 Reise SP. The Rediscovery of Bifactor Measurement Models. *Multivariate Behav Res*  
45  
46 20 2012;**47**:667–96. doi:10.1080/00273171.2012.715555  
47  
48  
49 21 49 Marsh HW, Bailey M. Confirmatory Factor Analyses of Multitrait-Multimethod Data: A  
50  
51 22 Comparison of Alternative Models. *Appl Psychol Meas* 1991;**15**:47–70.  
52  
53 23 doi:10.1177/014662169101500106  
54  
55  
56 24 50 Tomás JM, Oliver A, Galiana L, *et al.* Explaining method effects associated with negatively  
57  
58 25 worded items in trait and state global and domain-specific self-esteem scales. *Struct Equ*  
59  
60

- 1  
2  
3 1 *Model A Multidiscip J* 2013;**20**:299–313.  
4  
5 2 51 Tomás JM, Gutiérrez M, Sancho P. Factorial Validity of the General Health Questionnaire 12  
6  
7 in an Angolan Sample. *Eur J Psychol Assess* 2017;**33**:116–22. doi:10.1027/1015-  
8 3  
9 5759/a000278  
10 4  
11  
12 5 52 Marsh HW, Scalas LF, Nagengast B. Longitudinal tests of competing factor structures for the  
13  
14 Rosenberg Self-Esteem Scale: Traits, ephemeral artifacts, and stable response styles. *Psychol*  
15 6  
16 *Assess* 2010;**22**:366–81.  
17 7  
18  
19 8 53 DiStefano C, Motl RW. Self-Esteem and method effects associated with negatively worded  
20  
21 items: Investigating factorial invariance by sex. *Struct Equ Model A Multidiscip J*  
22 9  
23 2009;**16**:134–46.  
24 10  
25  
26 11 54 Gana K, Saada Y, Bailly N, *et al.* Longitudinal factorial invariance of the Rosenberg Self-  
27  
28 Esteem Scale: Determining the nature of method effects due to item wording. *J Res Pers*  
29 12  
30 2013;**47**:406–16.  
31 13  
32  
33 14 55 Lindwall M, Barkoukis V, Grano C, *et al.* Method effects: The problem with negatively  
34  
35 versus positively keyed items. *J Pers Assess* 2012;**94**:196–204.  
36 15  
37  
38 16 56 Michaelides MP, Zenger M, Koutsogiorgi C, *et al.* Personality correlates and gender  
39  
40 invariance of wording effects in the German version of the Rosenberg Self-Esteem Scale.  
41  
42 *Pers Individ Dif* 2016;**97**:13–8. doi:10.1016/J.PAID.2016.03.011  
43 18  
44  
45 19 57 Urbán R, Szigeti R, Kökönyei G, *et al.* Global self-esteem and method effects: Competing  
46  
47 factor structures, longitudinal invariance, and response styles in adolescents. *Behav Res*  
48  
49 *Methods* 2014;**46**:488–98. doi:10.3758/s13428-013-0391-5  
50 21  
51  
52 22 58 Mullen SP, Gothe NP, McAuley E. Evaluation of the factor structure of the Rosenberg Self-  
53  
54 Esteem Scale in older adults. *Pers Individ Dif* 2013;**54**:153–7.  
55 23  
56 24 59 Marsh HW. Positive and negative global self-esteem: A substantively meaningful distinction  
57  
58 or artifactors? *J Pers Soc Psychol* 1996;**70**:810–9. doi:10.1037/0022-3514.70.4.810  
59  
60

- 1  
2  
3 1 60 Catalonian Labor Relations and Quality of Work Department. *Segunda Encuesta Catalana*  
4  
5 2 *de Condiciones de Trabajo [Second Catalonian Survey of Working Conditions]*. Barcelona: :  
6  
7 Author 2012.  
8 3  
9  
10 4 61 Lobo A, Muñoz PE. Versiones en lengua española validadas. In: Goldberg D, Williams P,  
11  
12 5 eds. *Cuestionario de Salud General GHQ (General Health Questionnaire)*. Guia para el  
13  
14 6 usuario de las distintas versiones [Guide for the use of the different validated versions in  
15  
16 7 Spanish language]. Barcelona, Spain: : Editorial Masson 1996.  
17  
18  
19 8 62 Muthén LK, Muthén BO. *Mplus User's Guide*. 6th ed. Los Angeles, CA: : Muthén &  
20  
21 9 Muthén 2011.  
22  
23  
24 10 63 Browne MW. Asymptotic distribution free methods in the analysis of covariance structures.  
25  
26 11 *Br J Math Stat Psychol* 1984;**37**:62–83.  
27  
28 12 64 Wouters E, Booyens F le R, Ponnet K, *et al*. Wording Effects and the Factor Structure of the  
29  
30 13 Hospital Anxiety & Depression Scale in HIV/AIDS Patients on Antiretroviral  
31  
32 14 Treatment in South Africa. *PLoS One* 2012;**7**:1–7. doi:10.1371/journal.pone.0034881  
33  
34  
35 15 65 Bors DA, Vigneau FO, Lalonde F. Measuring the Need for Cognition: Item polarity,  
36  
37 16 dimensionality, and the relation with ability. *Pers Individ Dif* 2006;**40**:819–28.  
38  
39  
40 17 66 Chen YH, Rendina-Gobioff G, Dedrick RF. Factorial Invariance of a Chinese Self-Esteem  
41  
42 18 Scale for Third and Sixth Grade Students: Evaluating Method Effects Associated with  
43  
44 19 Positively and Negatively Worded Items. *Int J Educ Psychol Assess* 2010;**6**:21–35.  
45  
46  
47 20 67 Corwyn RF. The factor structure of global self-esteem among adolescents and adults. *J Res*  
48  
49 21 *Pers* 2000;**34**:357–79.  
50  
51  
52 22 68 Rammstedt B, Goldberg LR, Borg I. The measurement equivalence of Big-Five factor  
53  
54 23 markers for persons with different levels of education. *J Res Pers* 2010;**44**:53–61.  
55  
56 24 69 Schmitt DP, Allik J. Simultaneous administration of the Rosenberg Self-Esteem Scale in 53  
57  
58 25 nations: Exploring the universal and culture-specific features of global self-esteem. *J Pers*  
59  
60



- 1  
2  
3 1        *Soc Psychol* 2005;**89**:623–42.  
4  
5 2 70      Podsakoff PM, MacKenzie SB, Podsakoff NP. Sources of method bias in social science  
6  
7 3        research and recommendations on how to control it. *Annu Rev Psychol* 2012;**63**:539–69.  
8  
9 4 71      Kamoen N, Holleman B, Mak P, *et al*. Agree or Disagree? Cognitive Processes in Answering  
10  
11 5        Contrastive Survey Questions. *Discourse Process* 2011;**48**:355–85.  
12  
13 6        doi:10.1080/0163853X.2011.578910  
14  
15 7  
16  
17  
18  
19  
20  
21  
22  
23  
24  
25  
26  
27  
28  
29  
30  
31  
32  
33  
34  
35  
36  
37  
38  
39  
40  
41  
42  
43  
44  
45  
46  
47  
48  
49  
50  
51  
52  
53  
54  
55  
56  
57  
58  
59  
60

1  
2  
3  
4  
5  
6  
7  
8  
9  
10  
11  
12  
13  
14  
15  
16  
17  
18  
19  
20  
21  
22  
23  
24  
25  
26  
27  
28  
29  
30  
31  
32  
33  
34  
35  
36  
37  
38  
39  
40  
41  
42  
43  
44  
45  
46  
47  
48  
49  
50  
51  
52  
53  
54  
55  
56  
57  
58  
59  
60

1  
2 →FILE Figure1.pdf

3  
4 *Figure 1.* Competing models tested for the 12-Item General Health Questionnaire. Underlined numbers identify negatively  
5 worded items. GPH: General Psychological Health factor; NW: Method factor associated with negatively worded items;  
6 PW: Method factor associated with positively worded items.

1  
2  
3 1  
4 2  
5 3 →FILE Figure2.pdf  
6  
7 4  
8  
9  
10 5  
11  
12 6  
13  
14 7  
15  
16 8  
17  
18 9  
19  
20 10  
21  
22 11  
23  
24 12  
25  
26 13  
27  
28 14  
29  
30 15  
31  
32 16  
33  
34 17  
35  
36 18  
37  
38 19  
39  
40  
41  
42  
43  
44  
45  
46  
47  
48  
49  
50  
51  
52  
53  
54  
55  
56  
57  
58  
59  
60

Figure 2. Bar charts of the response distributions for the 12-item General Health Questionnaire. Responses were given on a different 4-point response scale for the positively worded items (0 = *better than usual*, 1 = *same as usual*, 2 = *less than usual*, 3 = *much less than usual*) and for the negatively worded items (0 = *not at all*, 1 = *no more than usual*, 2 = *more than usual*, 3 = *much more than usual*).



Figure 1. Competing models tested for the 12-Item General Health Questionnaire. Underlined numbers identify negatively worded items. GPH: General Psychological Health factor; GPH-1: Social dysfunction; GPH-2: Anxiety and depression; GPH-3: Loss of confidence; NW: Method factor associated with negatively worded items; PW: Method factor associated with positively worded items.

Positively worded items

Negatively worded items



Figure 2. Bar charts of the response distributions for the 12-item General Health Questionnaire. Responses were given on a different 4-point response scale for the positively worded items (0 = better than usual, 1 = same as usual, 2 = less than usual, 3 = much less than usual) and for the negatively worded items (0 = not at all, 1 = no more than usual, 2 = more than usual, 3 = much more than usual).

1  
2  
3  
4  
5  
6  
7  
8  
9  
10  
11  
12  
13  
14  
15  
16  
17  
18  
19  
20  
21  
22  
23  
24  
25  
26  
27  
28  
29  
30  
31  
32  
33  
34  
35  
36  
37  
38  
39  
40  
41  
42  
43  
44  
45  
46  
47  
48  
49  
50  
51  
52  
53  
54  
55  
56  
57  
58  
59  
60STROBE Statement—Checklist of items that should be included in reports of *cross-sectional studies*

|                              | <b>Item No</b> | <b>Recommendation</b>                                                                                                                                                                                                                                 |
|------------------------------|----------------|-------------------------------------------------------------------------------------------------------------------------------------------------------------------------------------------------------------------------------------------------------|
| <b>Title and abstract</b>    | 1              | (a) Indicate the study's design with a commonly used term in the title or the abstract<br><b>P.1 Lines 1-4 (Title)</b>                                                                                                                                |
|                              |                | (b) Provide in the abstract an informative and balanced summary of what was done and what was found<br><b>P.3 Lines 1-18 (Abstract)</b>                                                                                                               |
| <b>Introduction</b>          |                |                                                                                                                                                                                                                                                       |
| Background/rationale         | 2              | Explain the scientific background and rationale for the investigation being reported<br><b>P.5 - P.8 (Introduction)</b>                                                                                                                               |
| Objectives                   | 3              | State specific objectives, including any prespecified hypotheses<br><b>P.8 Lines 5-9 (Introduction)</b>                                                                                                                                               |
| <b>Methods</b>               |                |                                                                                                                                                                                                                                                       |
| Study design                 | 4              | Present key elements of study design early in the paper<br><b>P.8 Lines 13-14 (Method - Participants)</b>                                                                                                                                             |
| Setting                      | 5              | Describe the setting, locations, and relevant dates, including periods of recruitment, exposure, follow-up, and data collection<br><b>P.8 Lines 15-16 (Method - Participants)</b>                                                                     |
| Participants                 | 6              | (a) Give the eligibility criteria, and the sources and methods of selection of participants<br><b>P.8 Lines 14-15 (Method - Participants)</b>                                                                                                         |
| Variables                    | 7              | Clearly define all outcomes, exposures, predictors, potential confounders, and effect modifiers. Give diagnostic criteria, if applicable<br><b>P.9 Lines 2-11 and P.11 Lines 1-5 (Method - Measures)</b>                                              |
| Data sources/<br>measurement | 8*             | For each variable of interest, give sources of data and details of methods of assessment (measurement). Describe comparability of assessment methods if there is more than one group<br><b>P.8 Lines 14-16 and P.9 Lines 2-11 (Method - Measures)</b> |
| Bias                         | 9              | Describe any efforts to address potential sources of bias<br><b>P.8 Line 14 (Method - Participants)</b>                                                                                                                                               |
| Study size                   | 10             | Explain how the study size was arrived at<br><b>P.8 Line 13 (Method - Participants)</b>                                                                                                                                                               |
| Quantitative variables       | 11             | Explain how quantitative variables were handled in the analyses. If applicable, describe which groupings were chosen and why<br><b>P.11 Lines 14-24 and P.12 Line 2 (Method – Statistical Analysis)</b>                                               |
| Statistical methods          | 12             | (a) Describe all statistical methods, including those used to control for confounding<br><b>P.11 Lines 7-24 (Method – Statistical Analysis)</b>                                                                                                       |
|                              |                | (b) Describe any methods used to examine subgroups and interactions<br><b>P.11 Line 25 and P.12 Lines 1-2 (Method – Statistical Analysis)</b>                                                                                                         |
|                              |                | (c) Explain how missing data were addressed<br><b>P.8 Lines 13-14 (Method – Participants). No missing data (personal interview)</b>                                                                                                                   |
|                              |                | (d) If applicable, describe analytical methods taking account of sampling strategy<br><b>P.8 Line 13 (Method – Participants)</b>                                                                                                                      |
|                              |                | (e) Describe any sensitivity analyses<br><b>P.11 Lines 14-24 (Method – Statistical Analysis)</b>                                                                                                                                                      |

**Results**

|                          |     |                                                                                                                                                                                                                                                                                                                                                                                                                                                                                                                                                                 |
|--------------------------|-----|-----------------------------------------------------------------------------------------------------------------------------------------------------------------------------------------------------------------------------------------------------------------------------------------------------------------------------------------------------------------------------------------------------------------------------------------------------------------------------------------------------------------------------------------------------------------|
| Participants             | 13* | (a) Report numbers of individuals at each stage of study—eg numbers potentially eligible, examined for eligibility, confirmed eligible, included in the study, completing follow-up, and analysed<br><a href="#">P.8 Lines 16-18 (Method – Participants)</a><br>(b) Give reasons for non-participation at each stage<br><a href="#">P.8 Line 13 (Method – Participants) Previous study cited (reference number 60)</a><br>(c) Consider use of a flow diagram<br><a href="#">P.8 Line 13 (Method – Participants) Previous study cited (reference number 60)</a>  |
| Descriptive data         | 14* | (a) Give characteristics of study participants (eg demographic, clinical, social) and information on exposures and potential confounders<br><a href="#">P.8 Table 1 (Method – Participants)</a><br>(b) Indicate number of participants with missing data for each variable of interest<br><a href="#">P.8 Lines 13-14 (Method – Participants). No missing data (personal interview)</a>                                                                                                                                                                         |
| Outcome data             | 15* | Report numbers of outcome events or summary measures<br><a href="#">P.9 Table 2 (Method - Measures) and P.12 Figure 2 (Method – Statistical Analysis)</a>                                                                                                                                                                                                                                                                                                                                                                                                       |
| Main results             | 16  | (a) Give unadjusted estimates and, if applicable, confounder-adjusted estimates and their precision (eg, 95% confidence interval). Make clear which confounders were adjusted for and why they were included<br><a href="#">P.9 Table 2 (Method - Measures) and P.12 Table 3 (Results)</a><br>(b) Report category boundaries when continuous variables were categorized<br><a href="#">Not applicable</a><br>(c) If relevant, consider translating estimates of relative risk into absolute risk for a meaningful time period<br><a href="#">Not applicable</a> |
| Other analyses           | 17  | Report other analyses done—eg analyses of subgroups and interactions, and sensitivity analyses<br><a href="#">P.13 Lines 4-14 (Results)</a>                                                                                                                                                                                                                                                                                                                                                                                                                     |
| <b>Discussion</b>        |     |                                                                                                                                                                                                                                                                                                                                                                                                                                                                                                                                                                 |
| Key results              | 18  | Summarise key results with reference to study objectives<br><a href="#">P.13 Lines 23-25 and P.14 Lines 1-14 (Discussion)</a>                                                                                                                                                                                                                                                                                                                                                                                                                                   |
| Limitations              | 19  | Discuss limitations of the study, taking into account sources of potential bias or imprecision. Discuss both direction and magnitude of any potential bias<br><a href="#">P.4 Lines 10-14 (Limitations) and P.15 Lines 20-21 (Discussion)</a>                                                                                                                                                                                                                                                                                                                   |
| Interpretation           | 20  | Give a cautious overall interpretation of results considering objectives, limitations, multiplicity of analyses, results from similar studies, and other relevant evidence<br><a href="#">P.14 Lines 21-25 and P.15 Lines 1-15 (Discussion)</a>                                                                                                                                                                                                                                                                                                                 |
| Generalisability         | 21  | Discuss the generalisability (external validity) of the study results<br><a href="#">P.15 Lines 16-20 (Discussion)</a>                                                                                                                                                                                                                                                                                                                                                                                                                                          |
| <b>Other information</b> |     |                                                                                                                                                                                                                                                                                                                                                                                                                                                                                                                                                                 |
| Funding                  | 22  | Give the source of funding and the role of the funders for the present study and, if applicable, for the original study on which the present article is based<br><a href="#">P.16 Lines 1-5 (Funding)</a>                                                                                                                                                                                                                                                                                                                                                       |

\*Give information separately for exposed and unexposed groups.

**Note:** An Explanation and Elaboration article discusses each checklist item and gives methodological background and published examples of transparent reporting. The STROBE checklist is best used in conjunction with this article (freely

1  
2  
3  
4  
5  
6  
7  
8  
9  
10  
11  
12  
13  
14  
15  
16  
17  
18  
19  
20  
21  
22  
23  
24  
25  
26  
27  
28  
29  
30  
31  
32  
33  
34  
35  
36  
37  
38  
39  
40  
41  
42  
43  
44  
45  
46  
47  
48  
49  
50  
51  
52  
53  
54  
55  
56  
57  
58  
59  
60

available on the Web sites of PLoS Medicine at <http://www.plosmedicine.org/>, Annals of Internal Medicine at <http://www.annals.org/>, and Epidemiology at <http://www.epidem.com/>). Information on the STROBE Initiative is available at [www.strobe-statement.org](http://www.strobe-statement.org).

For peer review only
